# Supplementary material
Source: publisher figshare collection journal article supplement (https://acs.figshare.com/ndownloader/files/4244869)

**Supporting Information**  
**Palladium-Catalyzed Direct *ortho* C-H Arylation of 2-Arylpyridine**  
**Derivatives with Aryltrimethoxysilane**

*Wu Li, Zhangwei Yin, Xiaoqing Jiang and Peipei Sun\**

*College of Chemistry and Materials Science, Nanjing Normal University, Nanjing, 210097, China.*

sunpeipei@njnu.edu.cn

**Contents:**

|                              |        |
|------------------------------|--------|
| General Considerations ..... | S1     |
| NMR spectras .....           | S2-S38 |

**General Considerations:** All of the reagents were used as received. Melting points (°C) are uncorrected. <sup>1</sup>H and <sup>13</sup>C NMR spectra were recorded at 400 and 100 MHz, respectively.

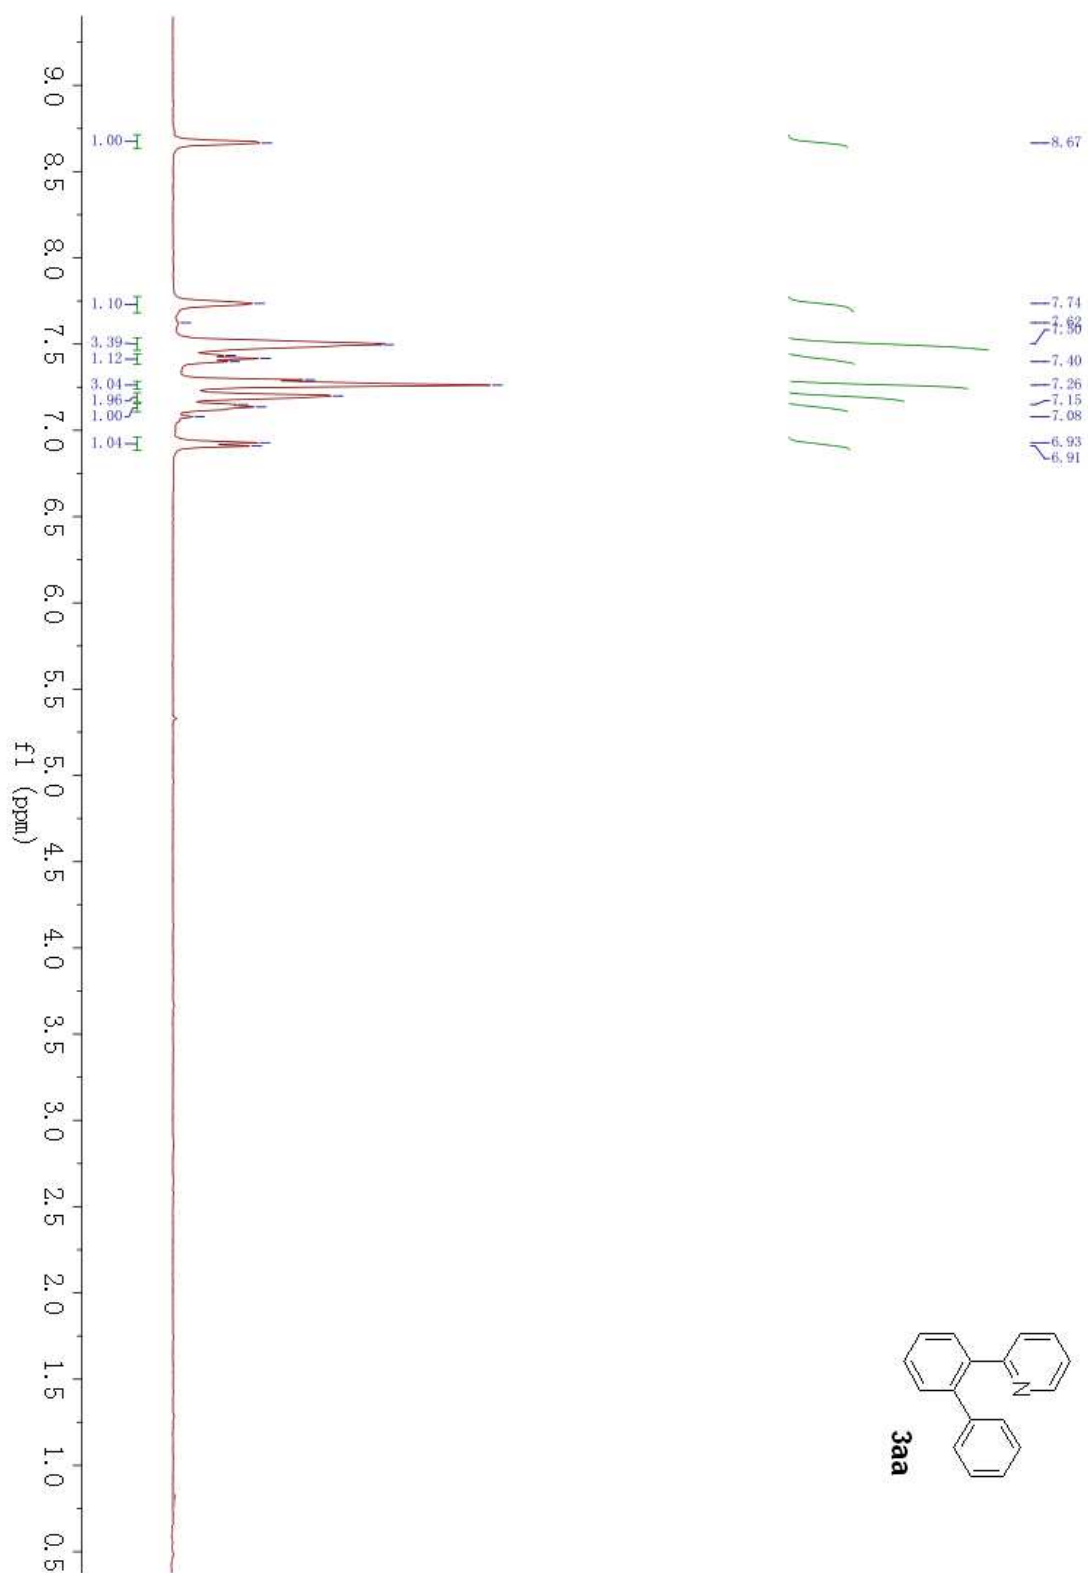

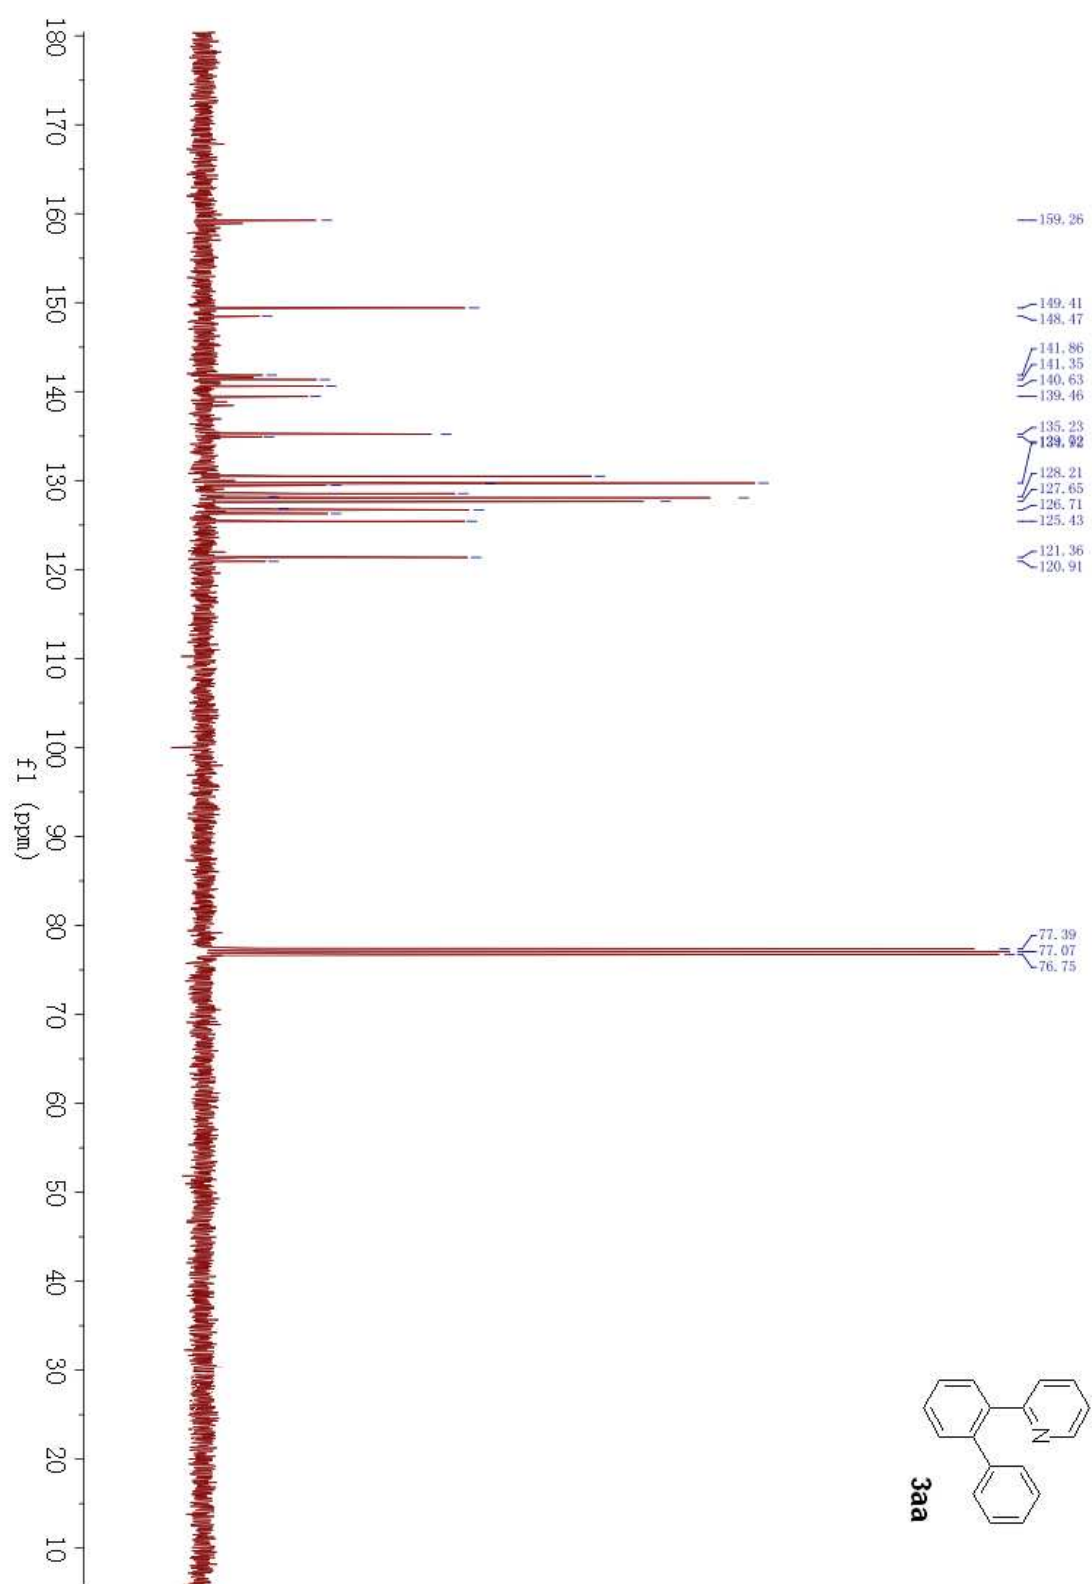

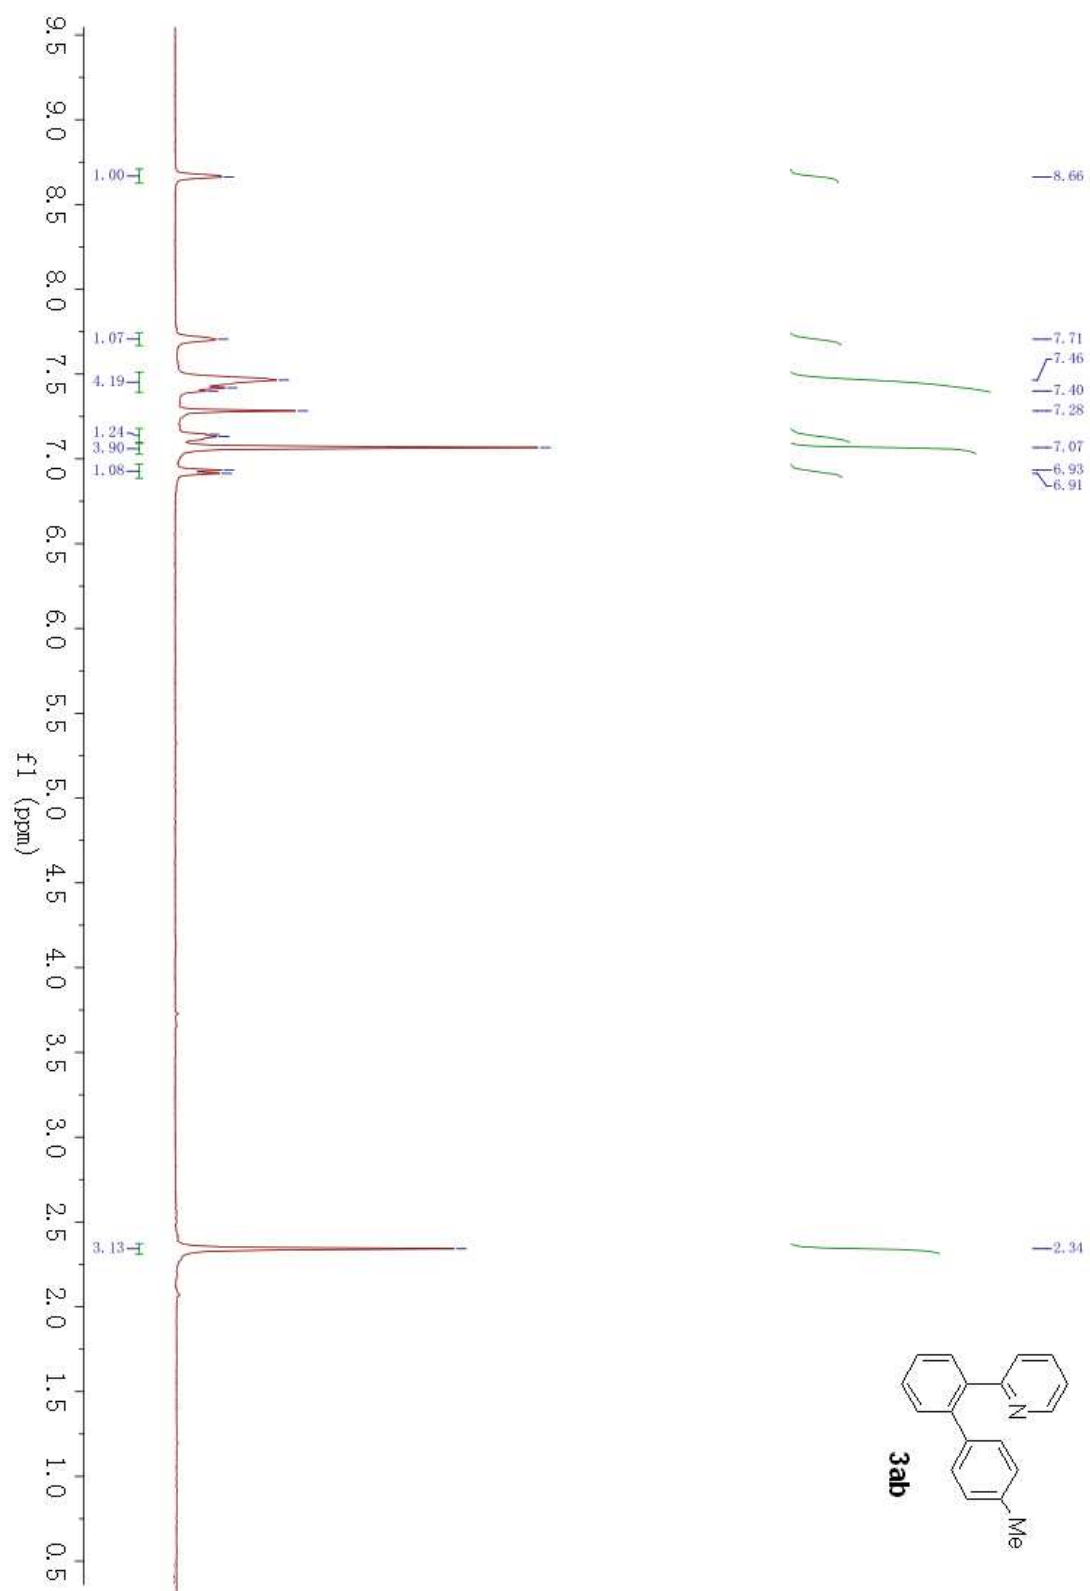

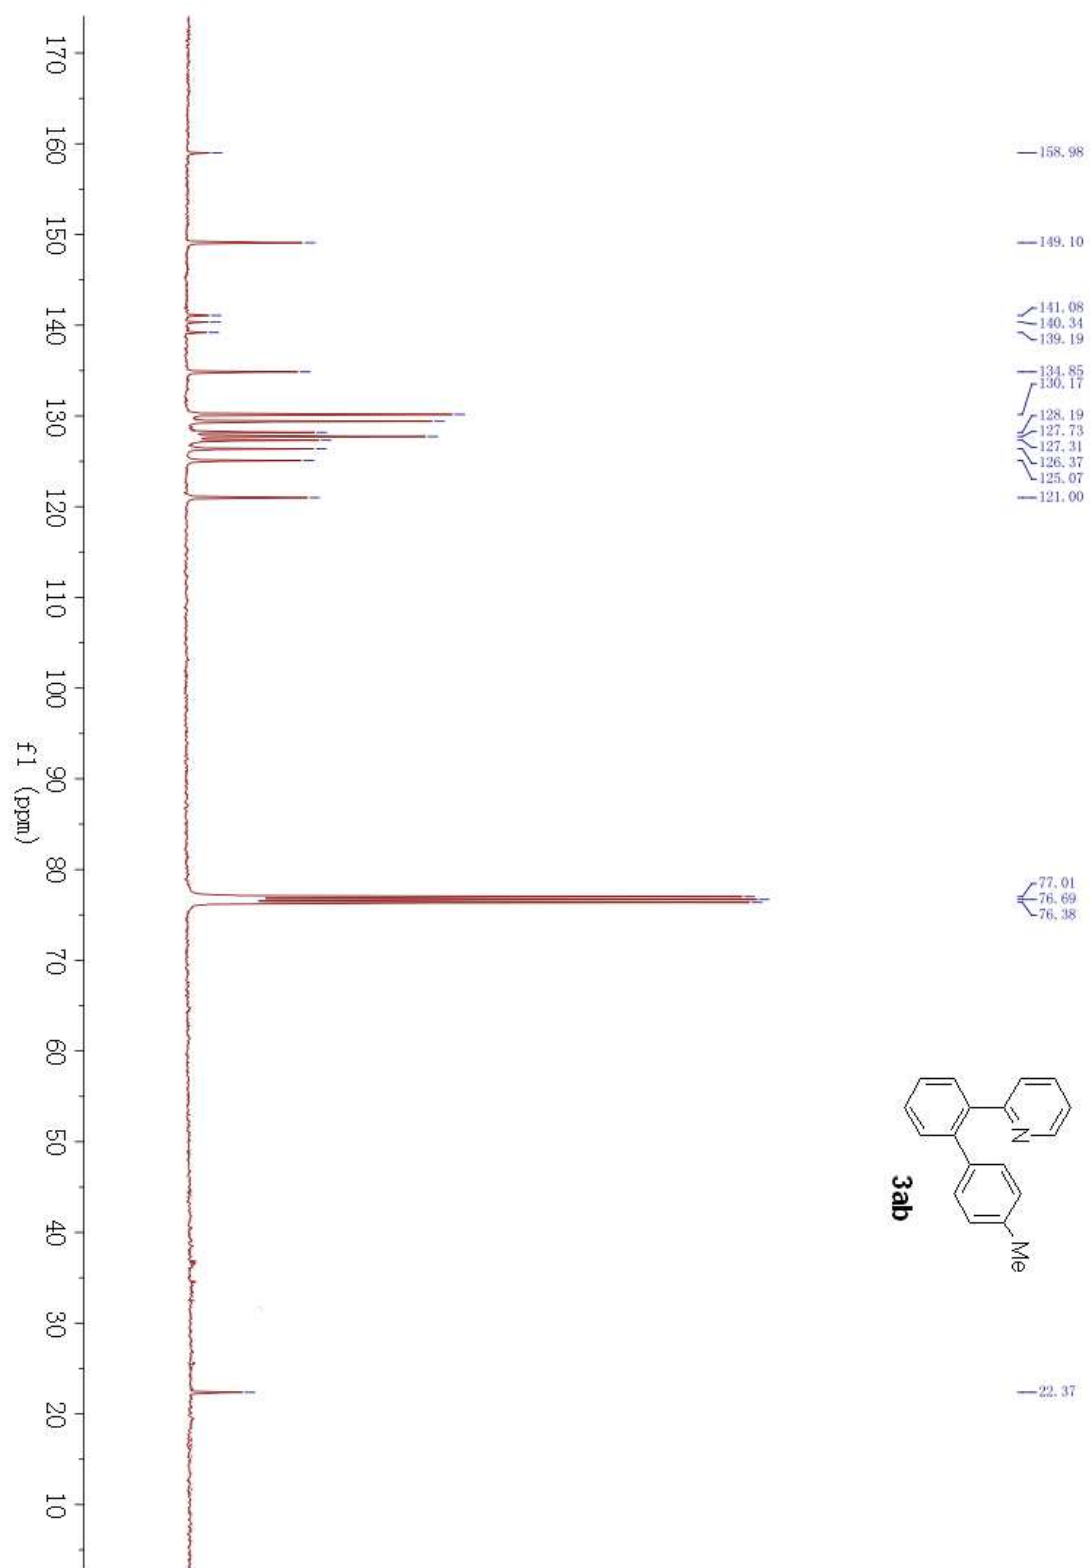

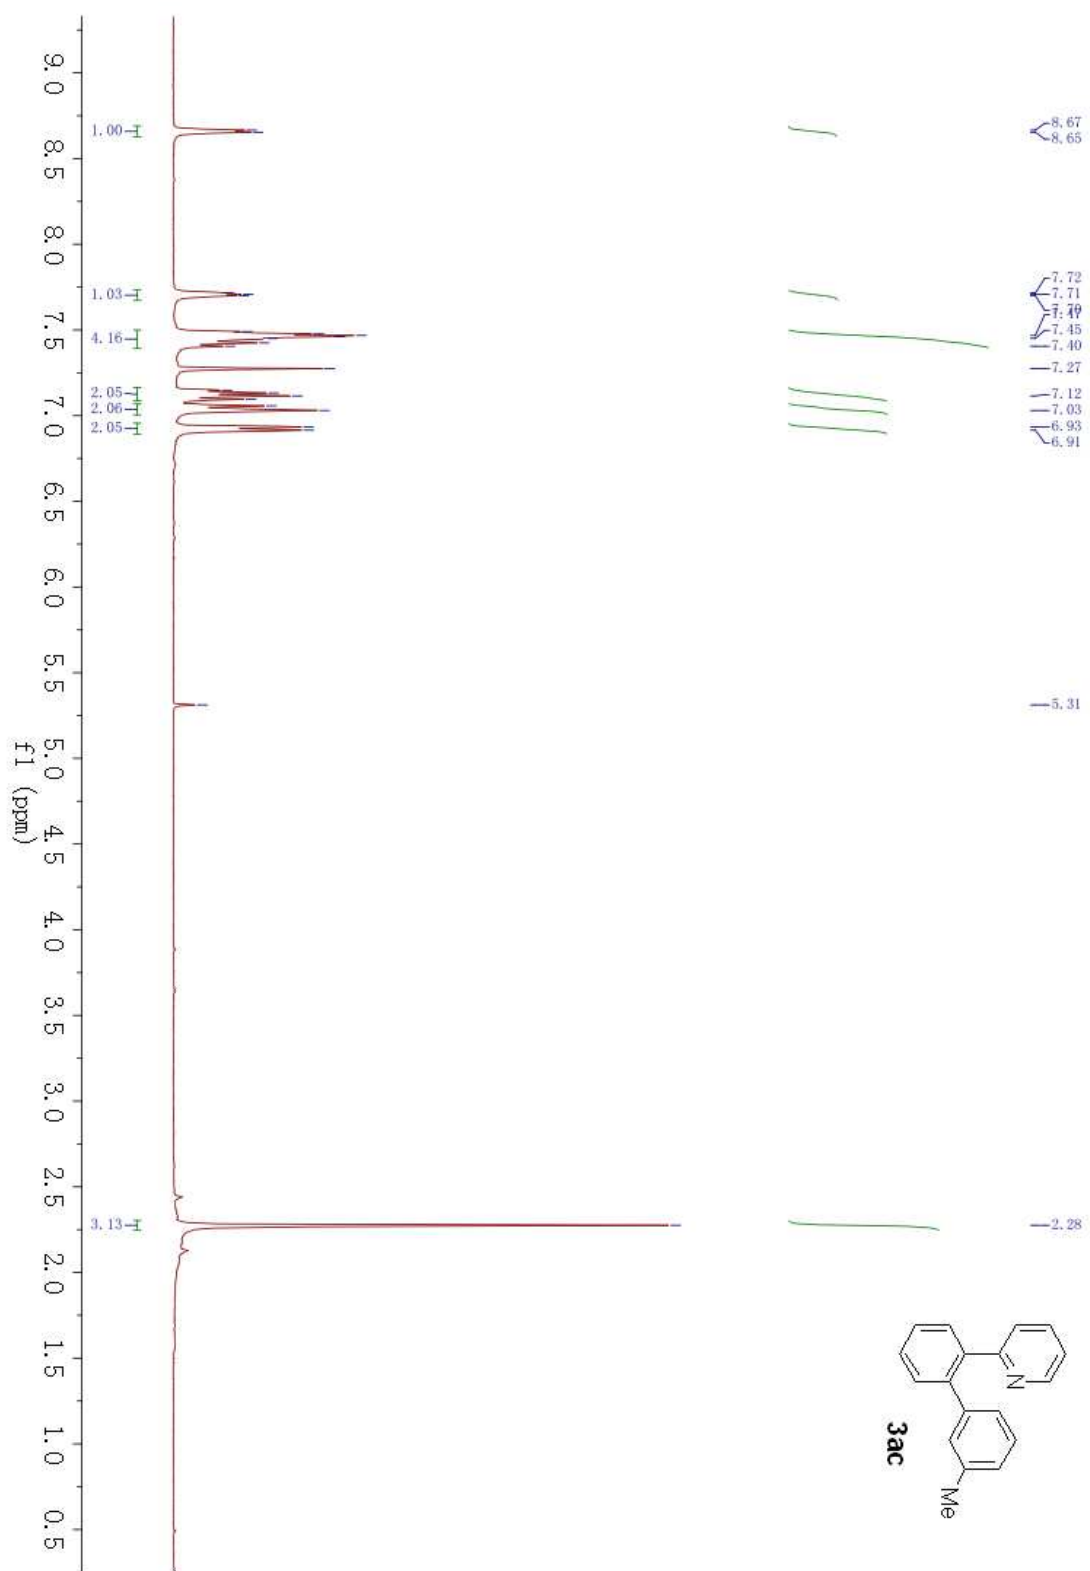

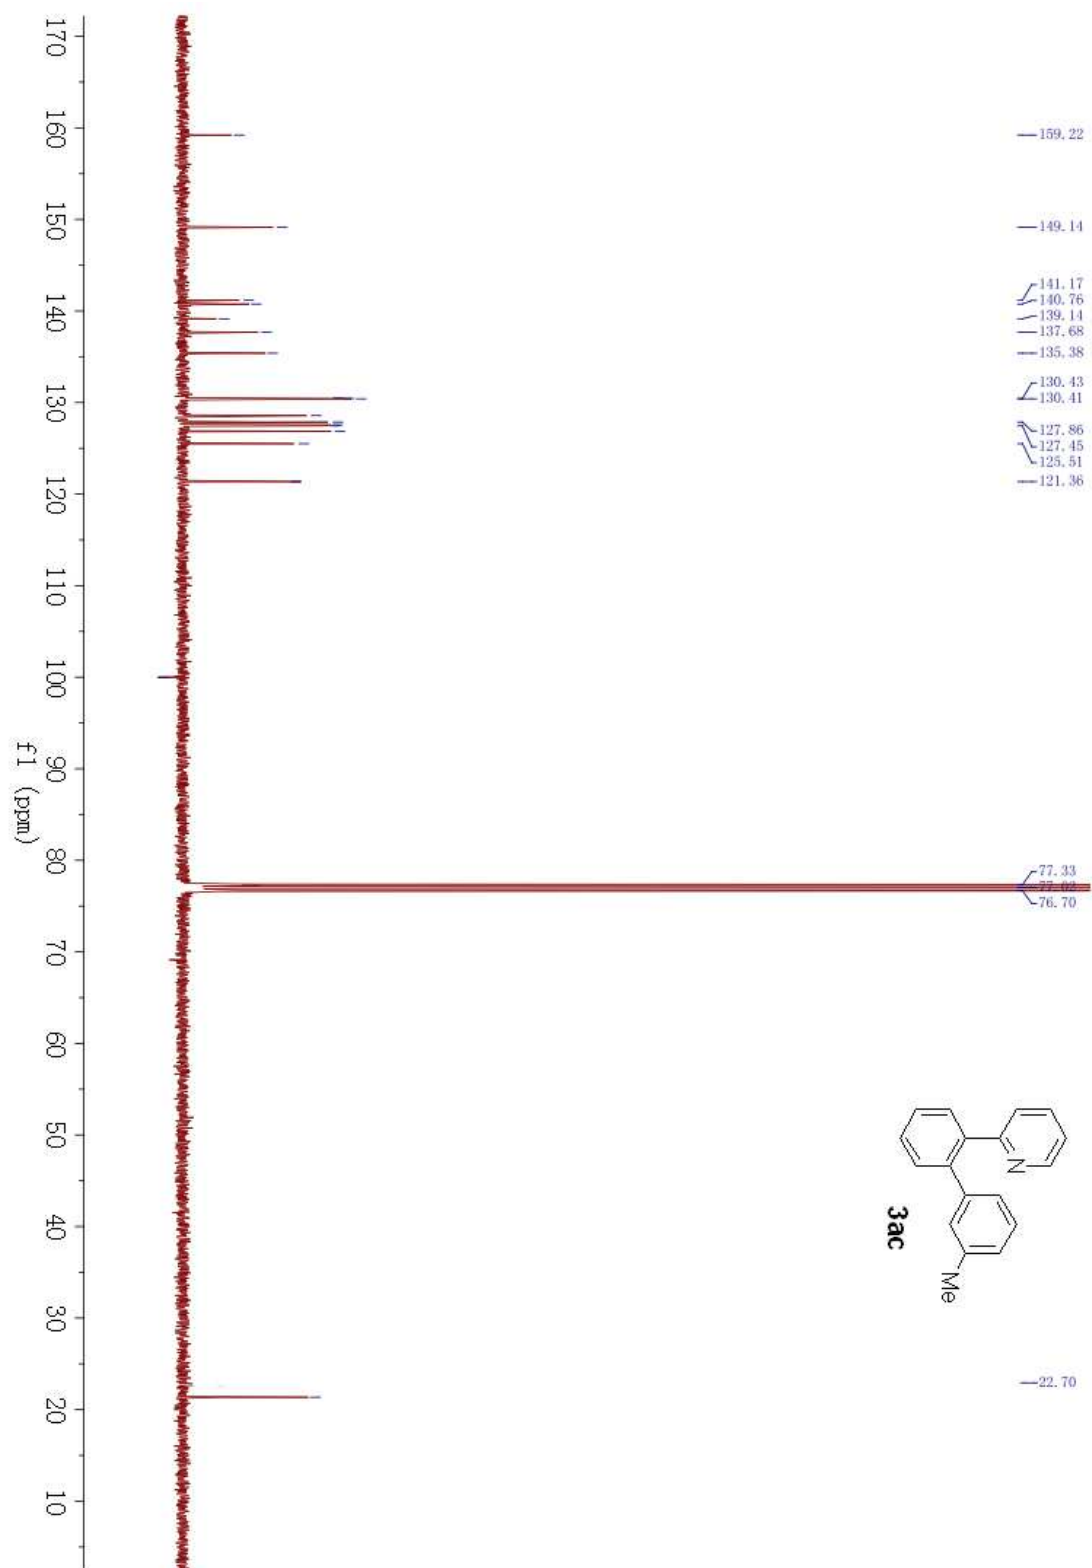

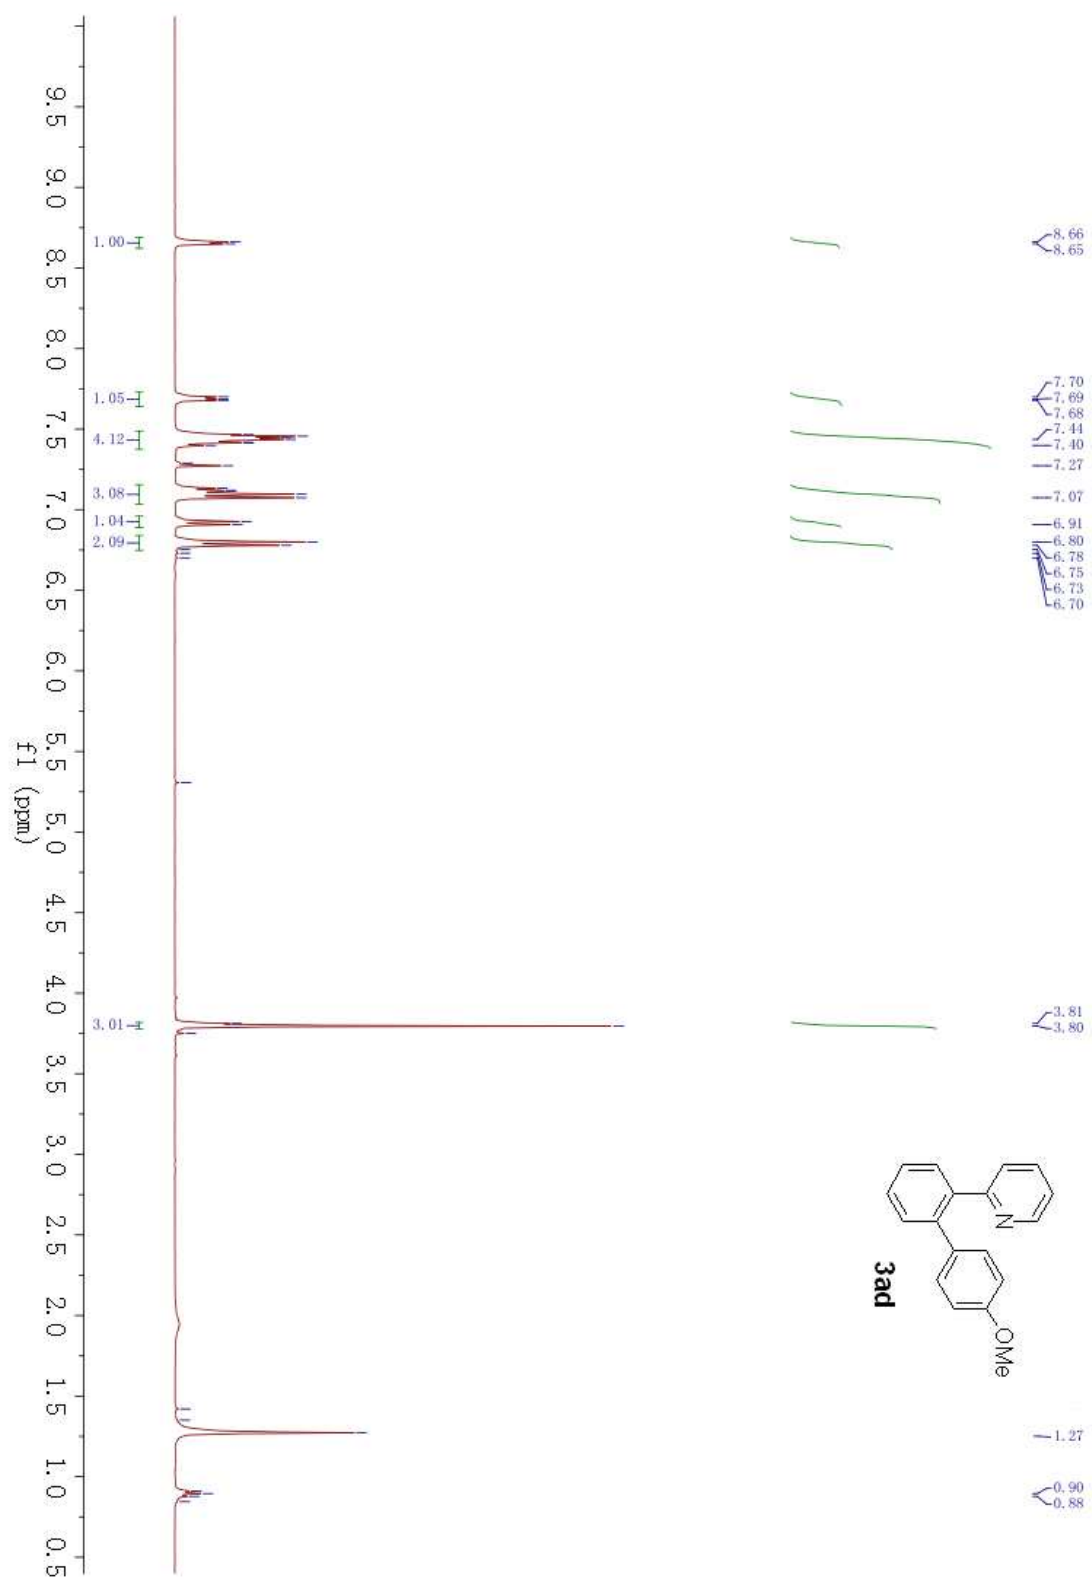



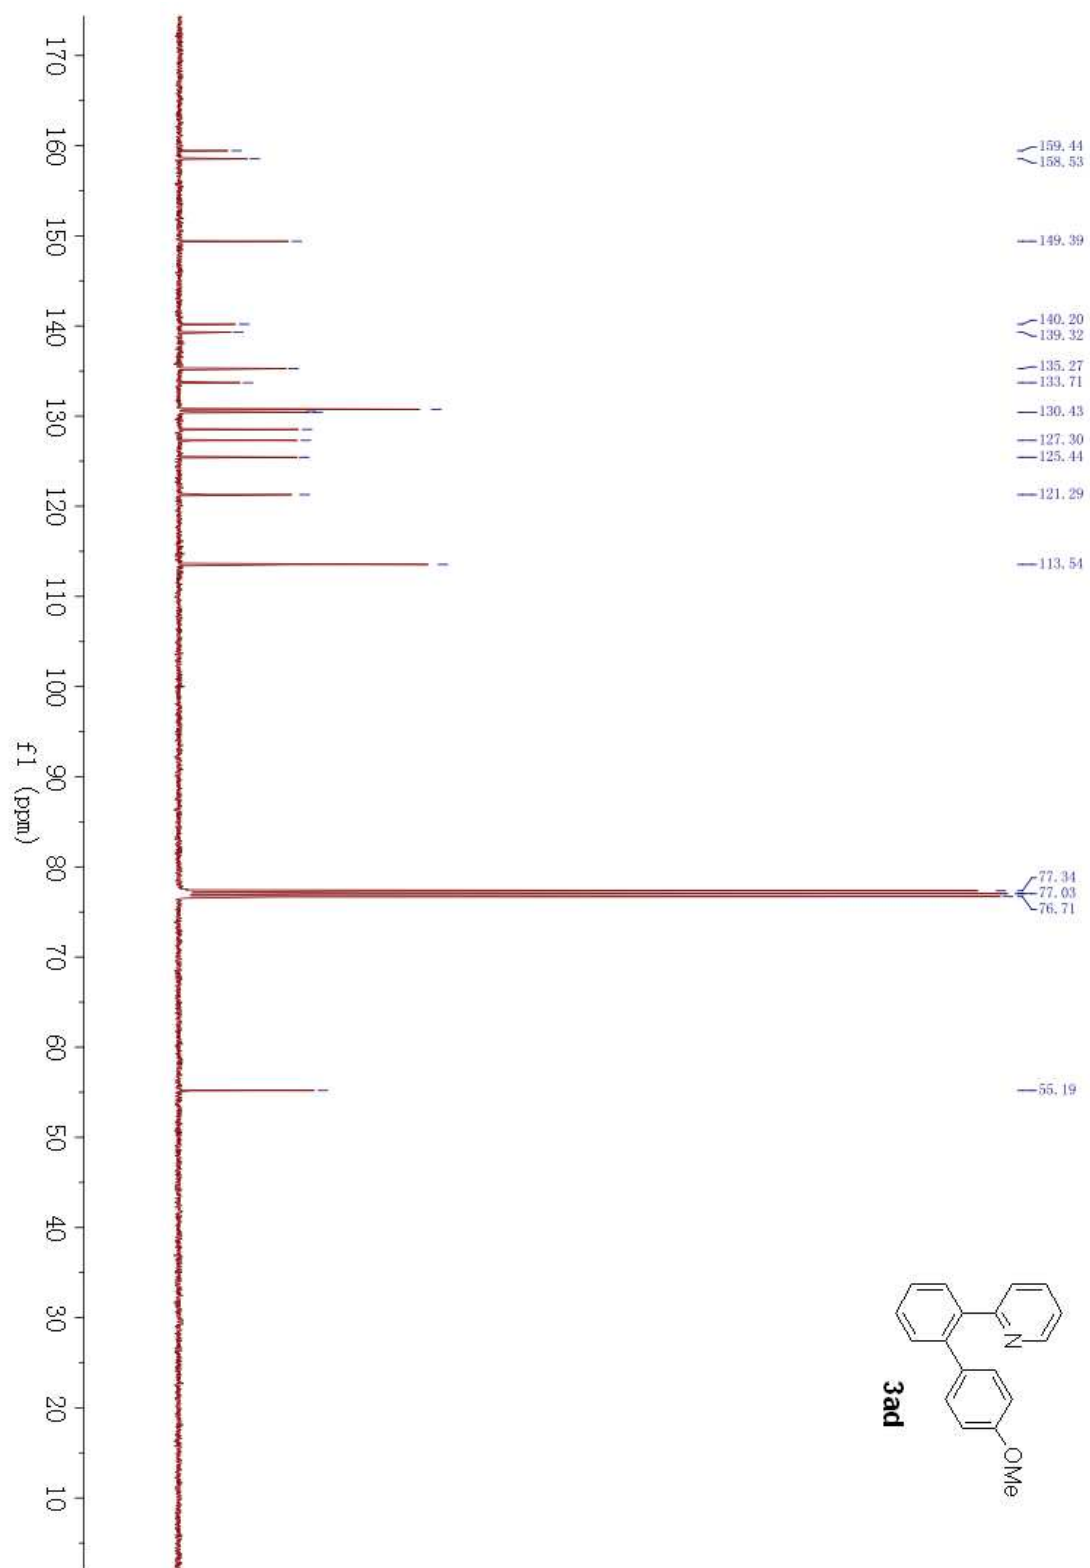

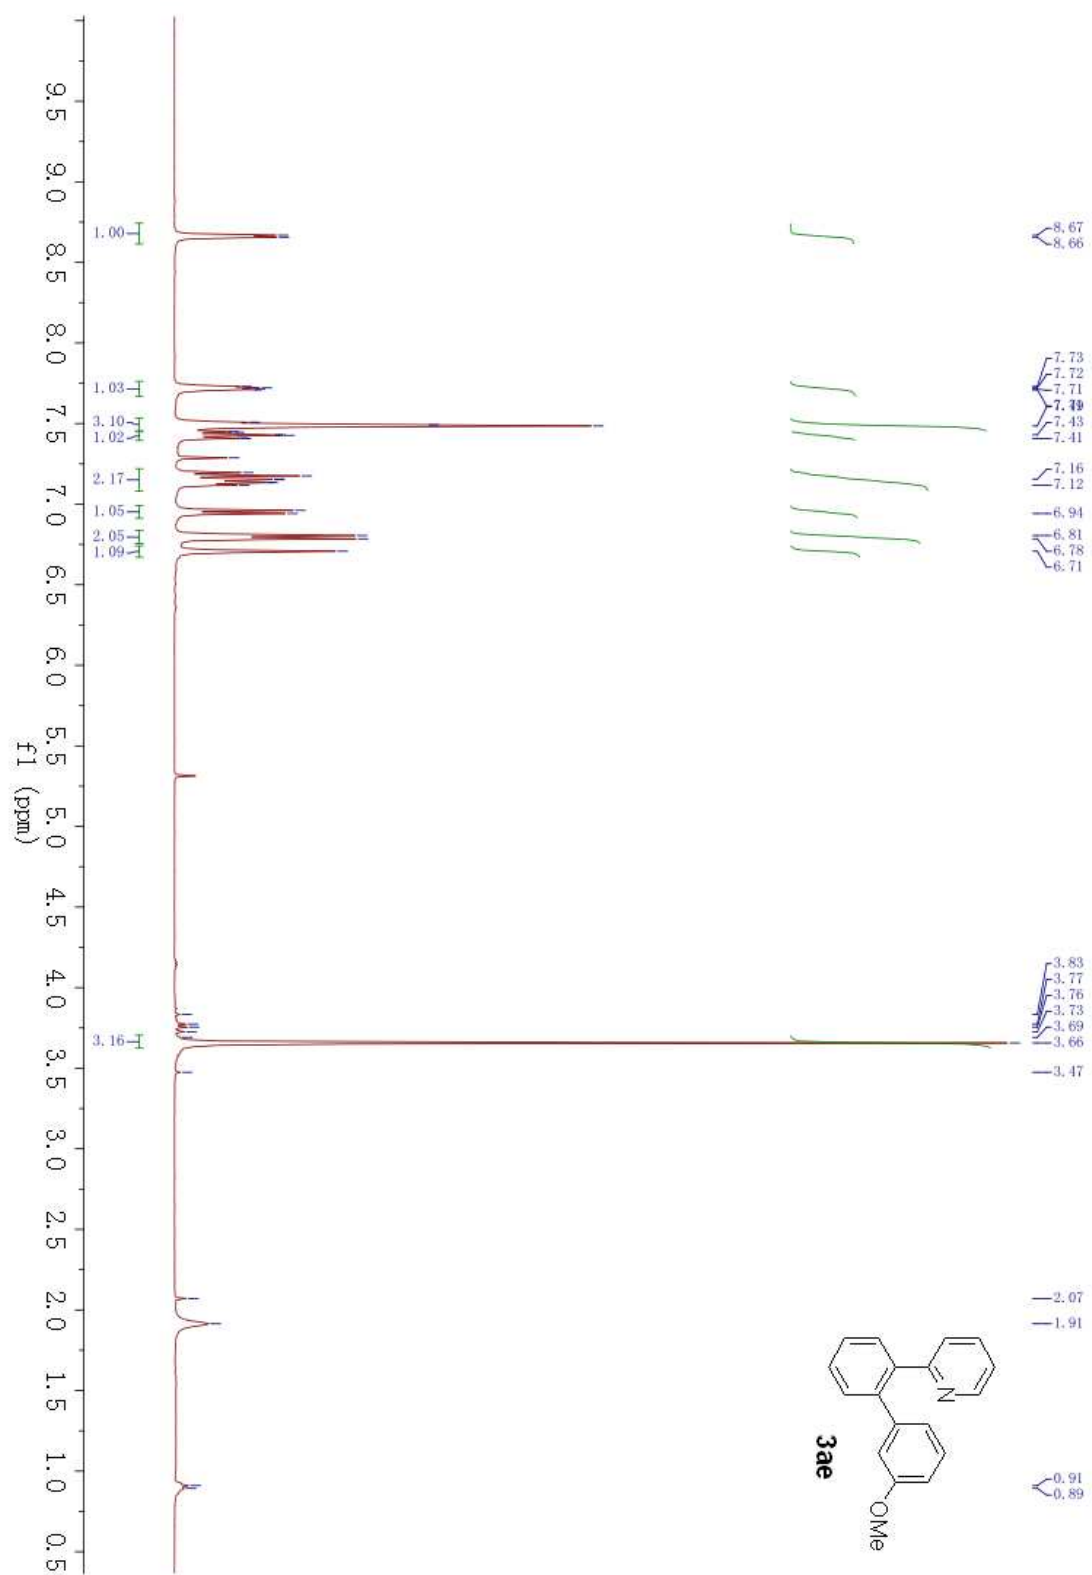

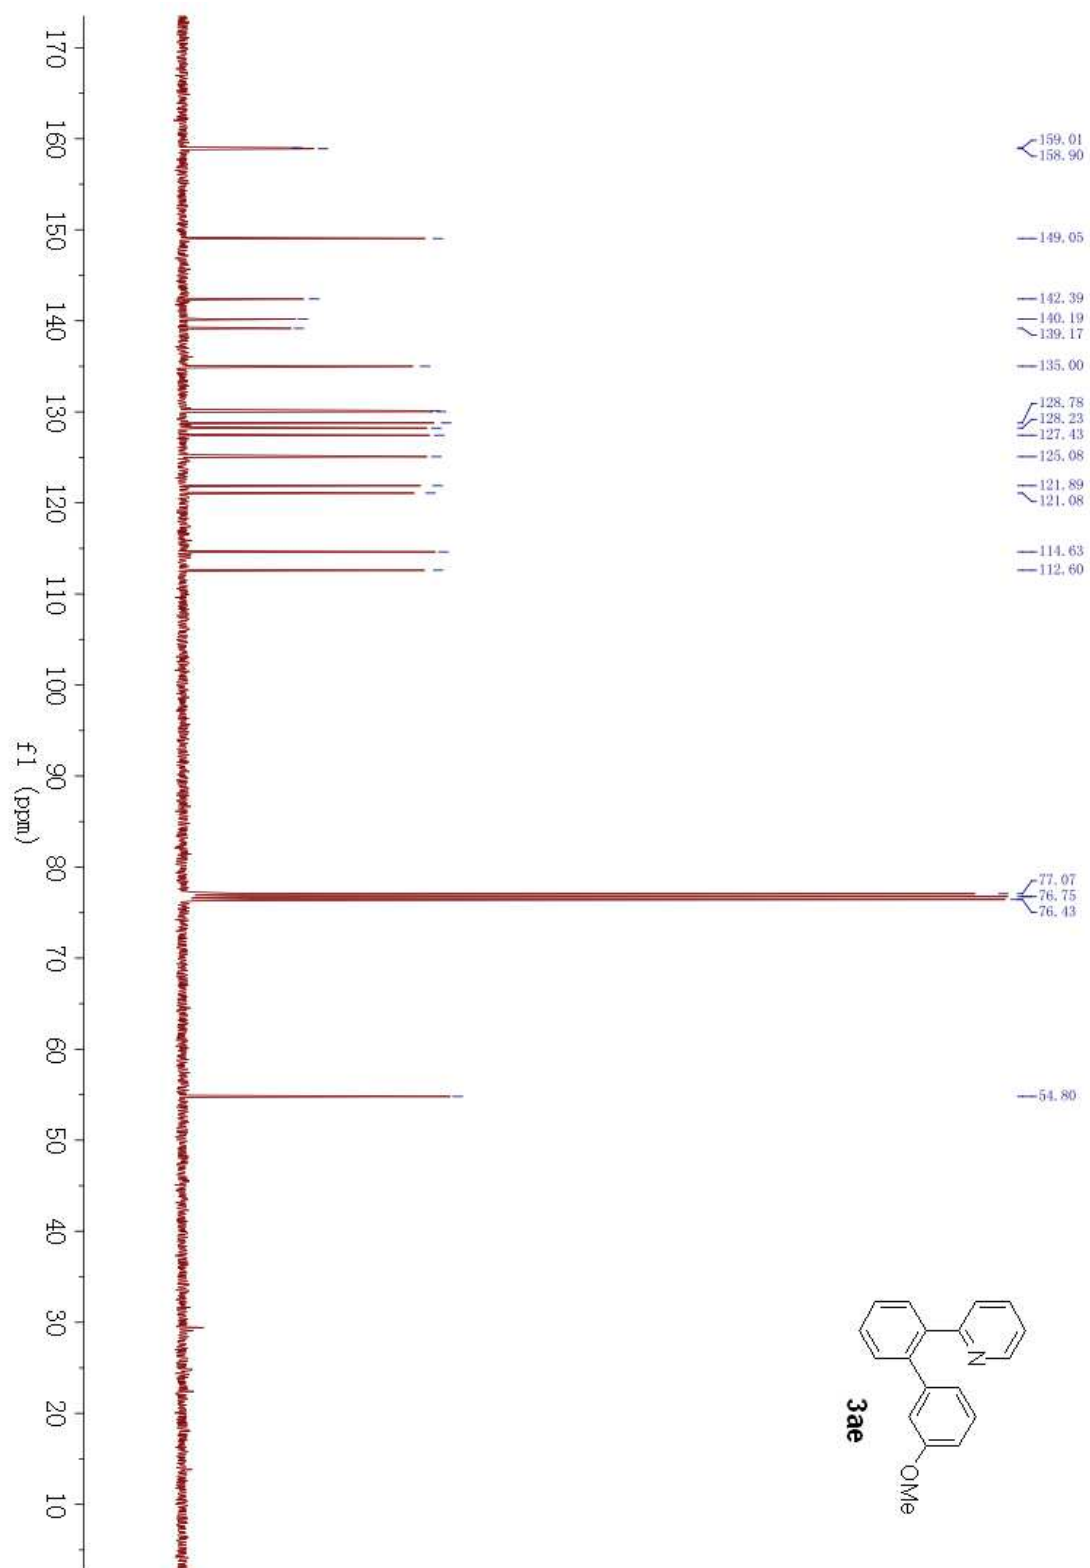

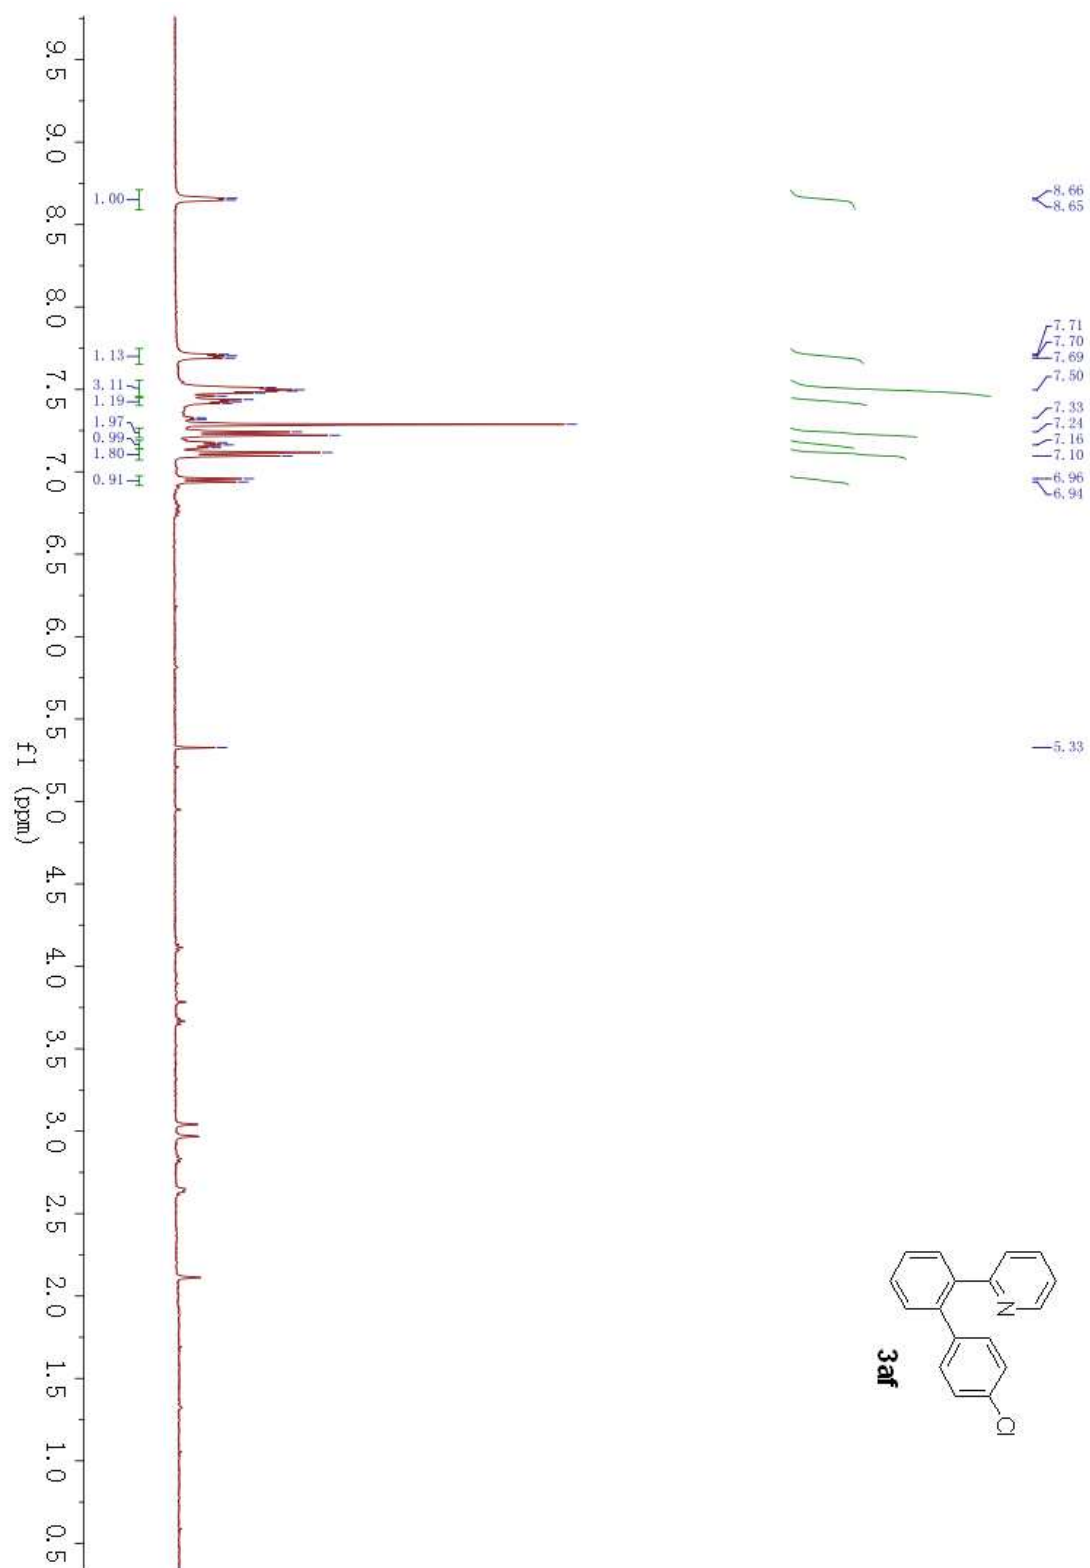

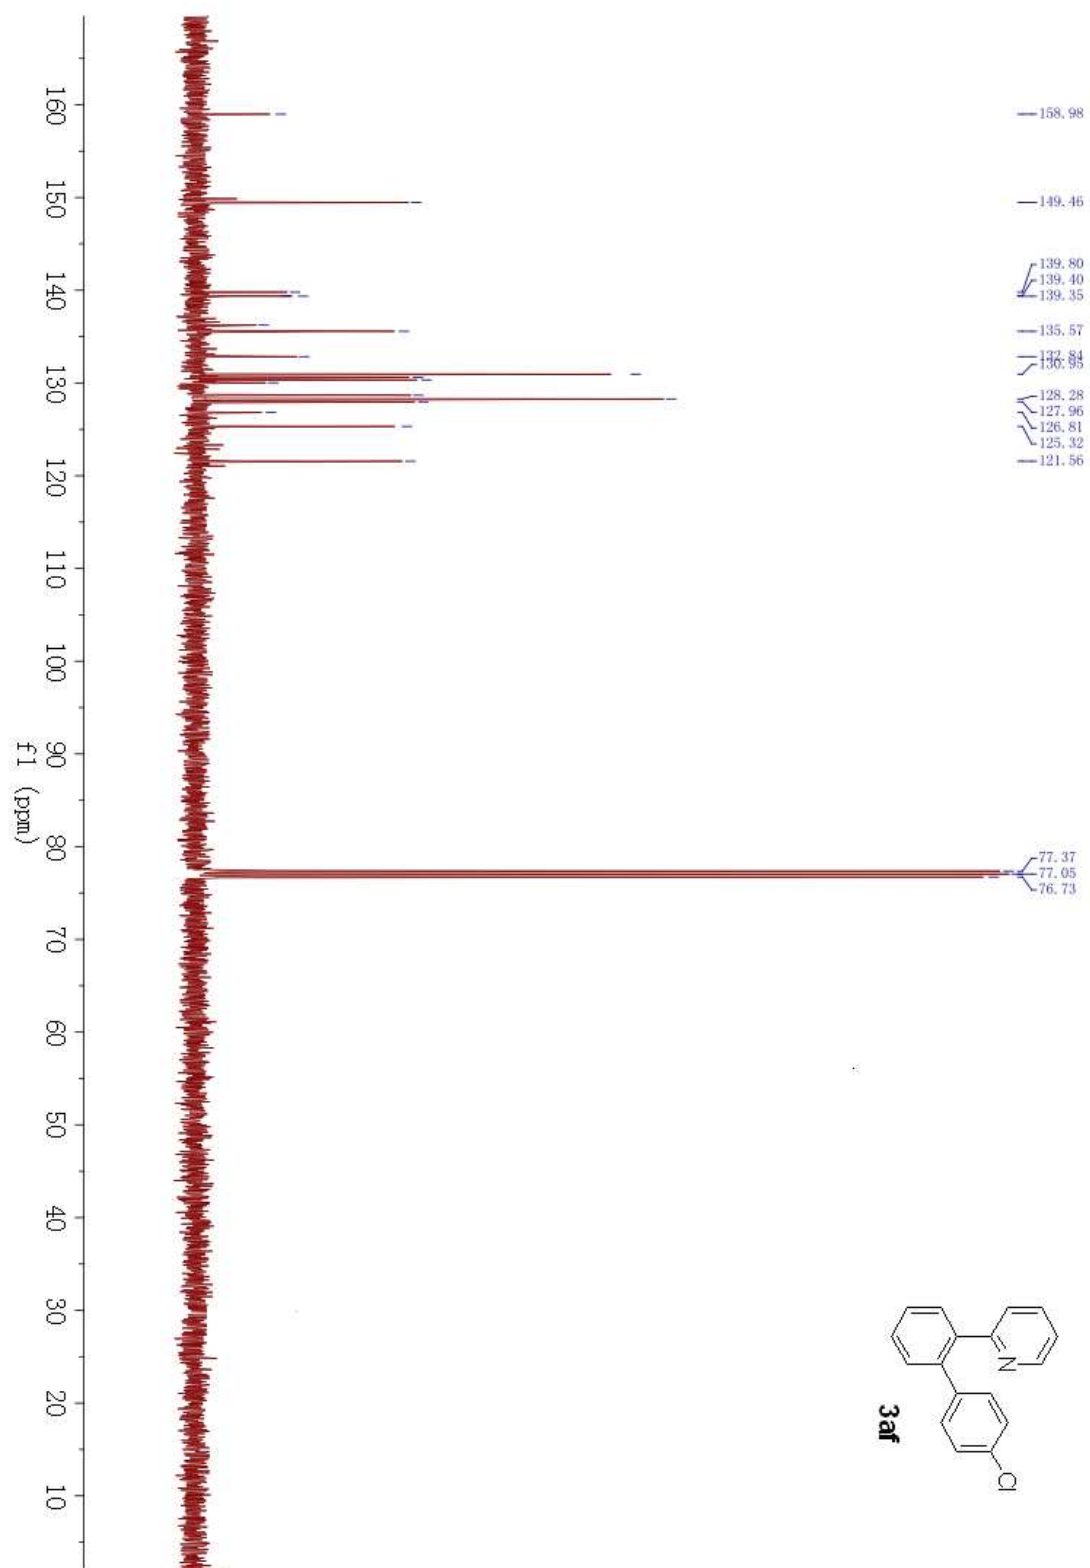

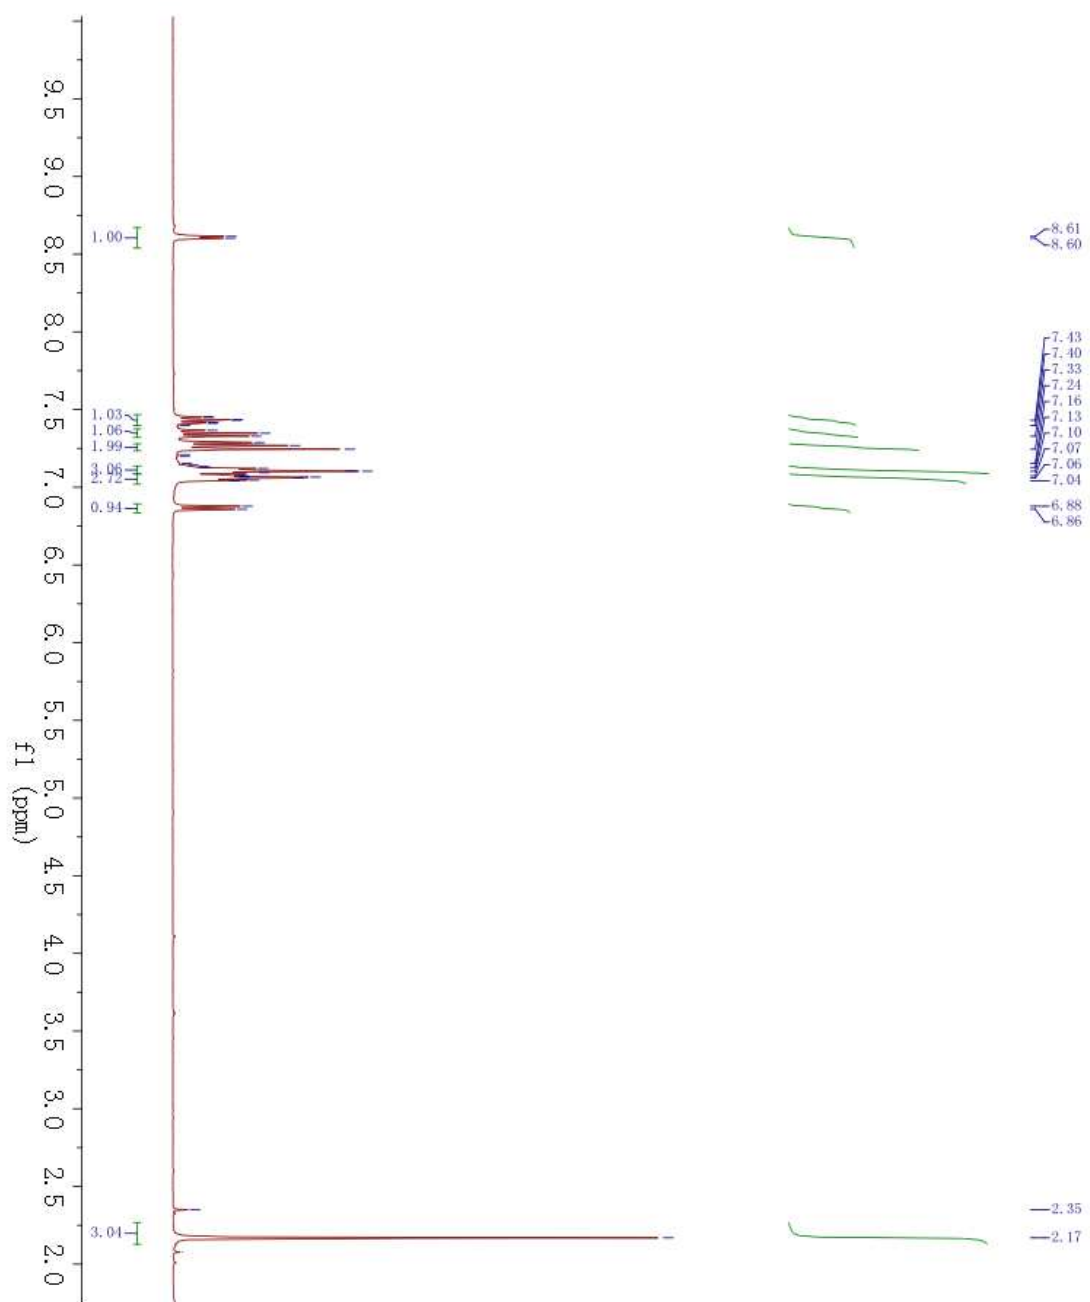

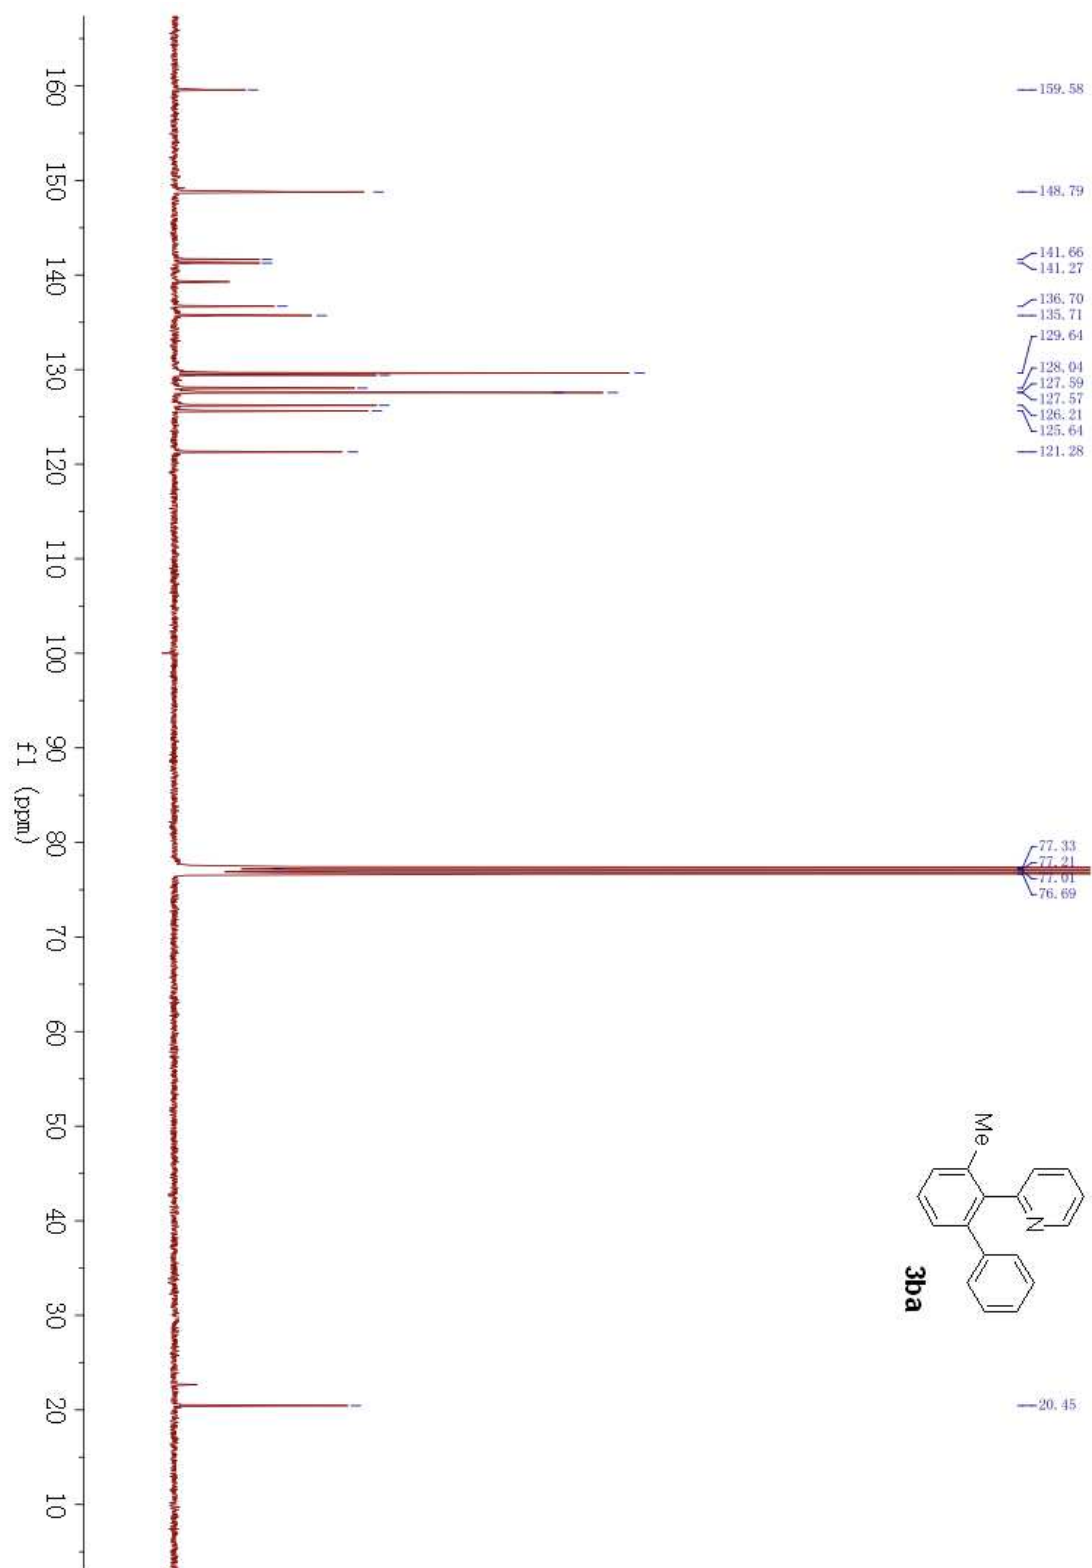

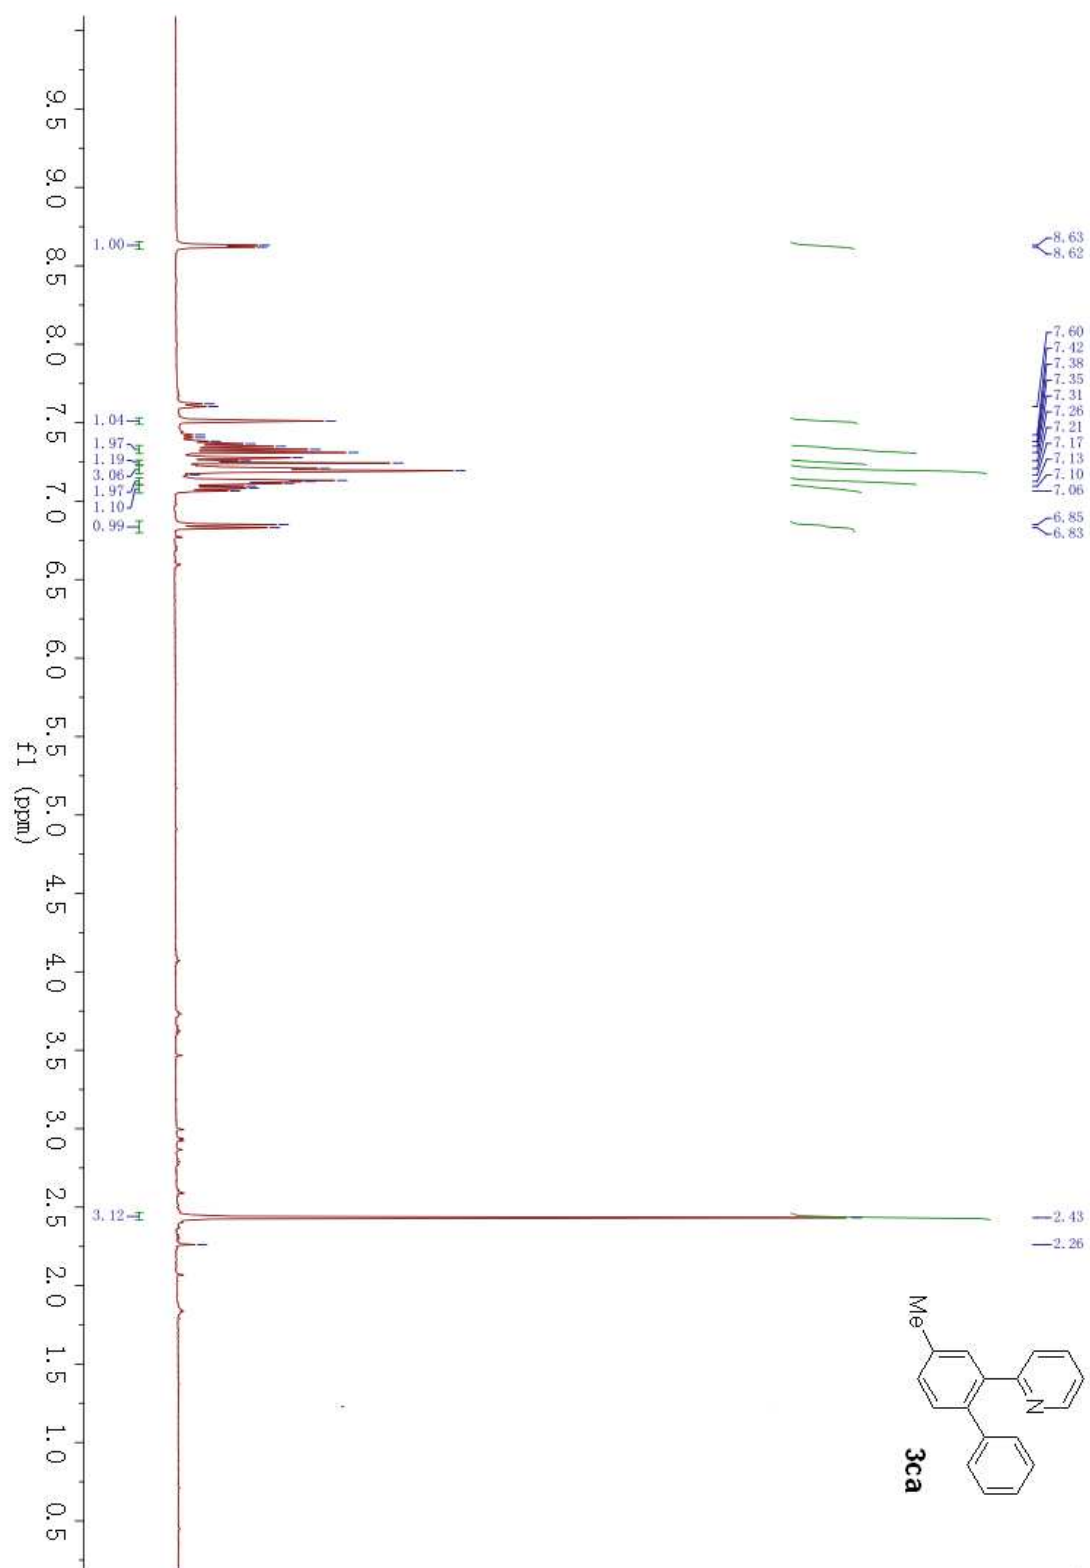



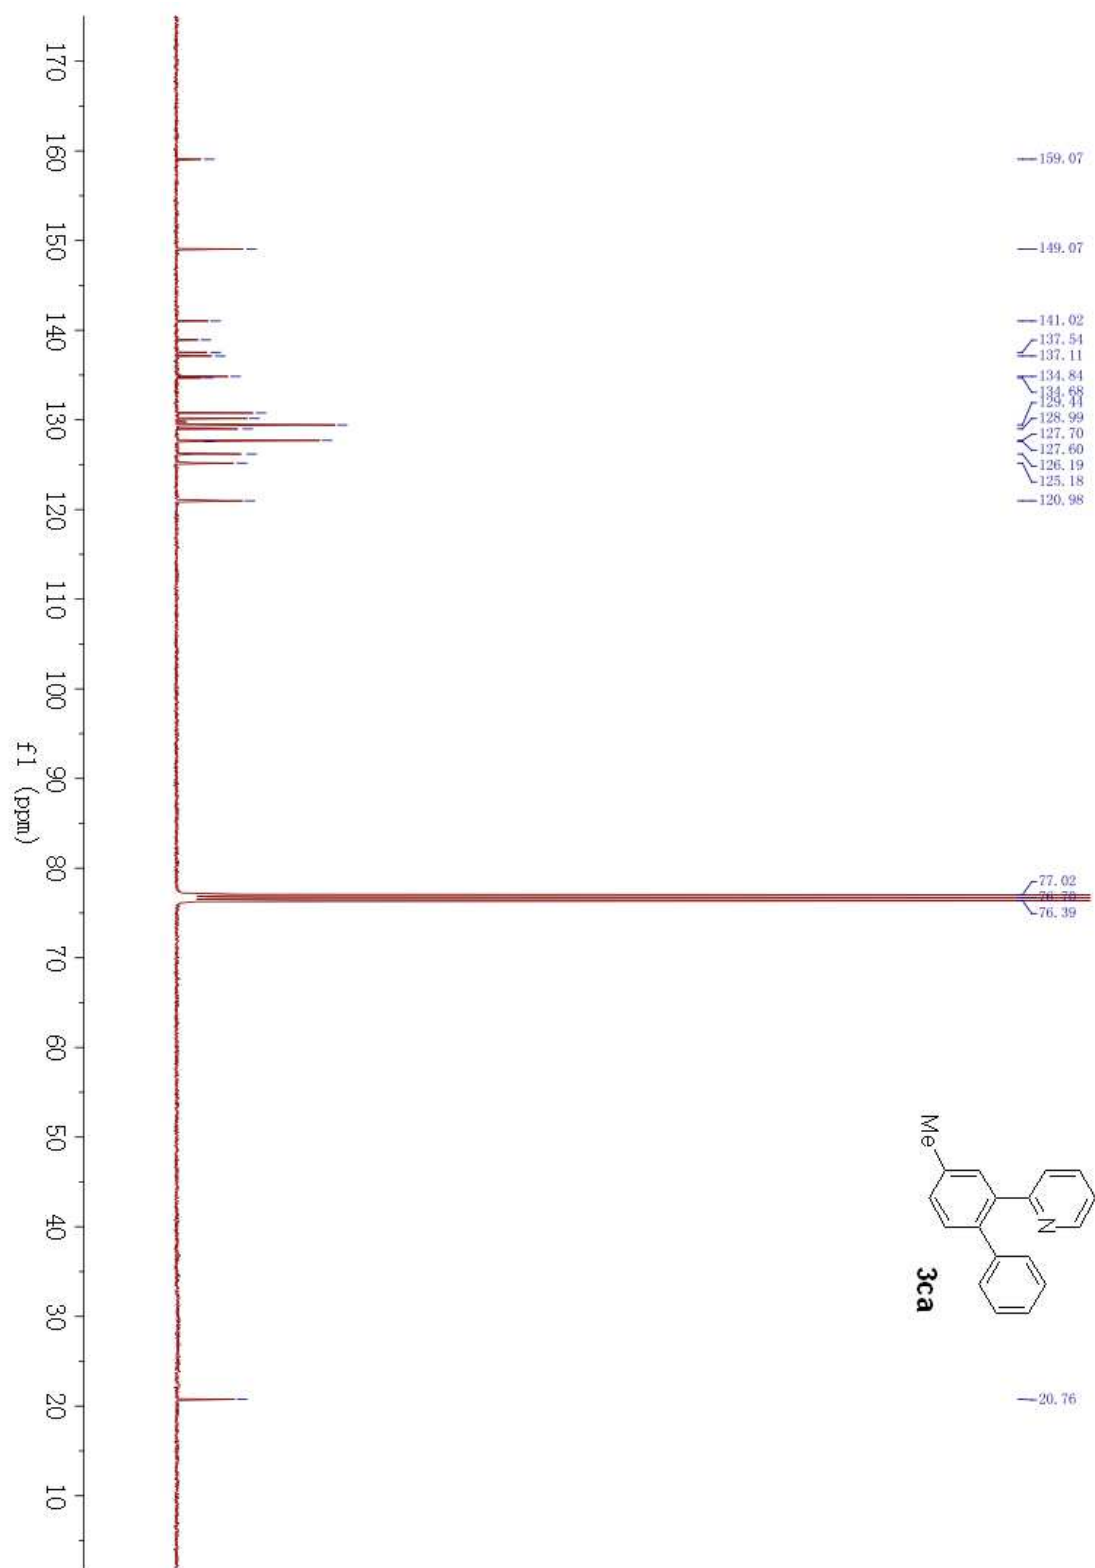

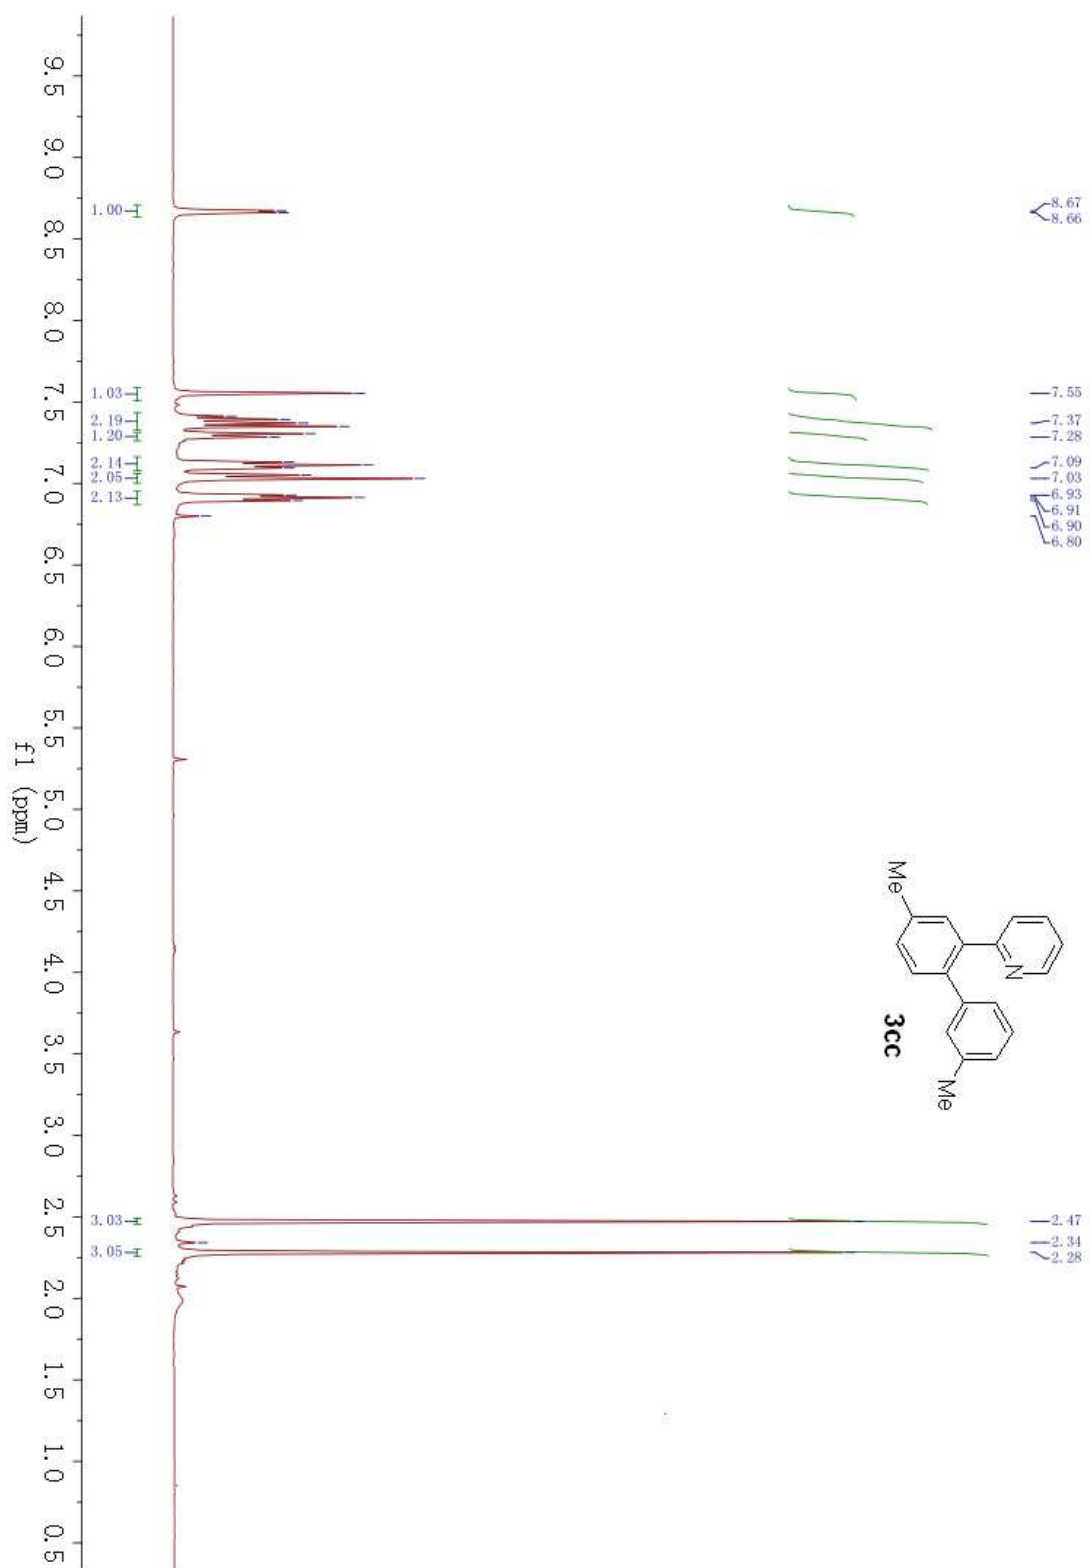

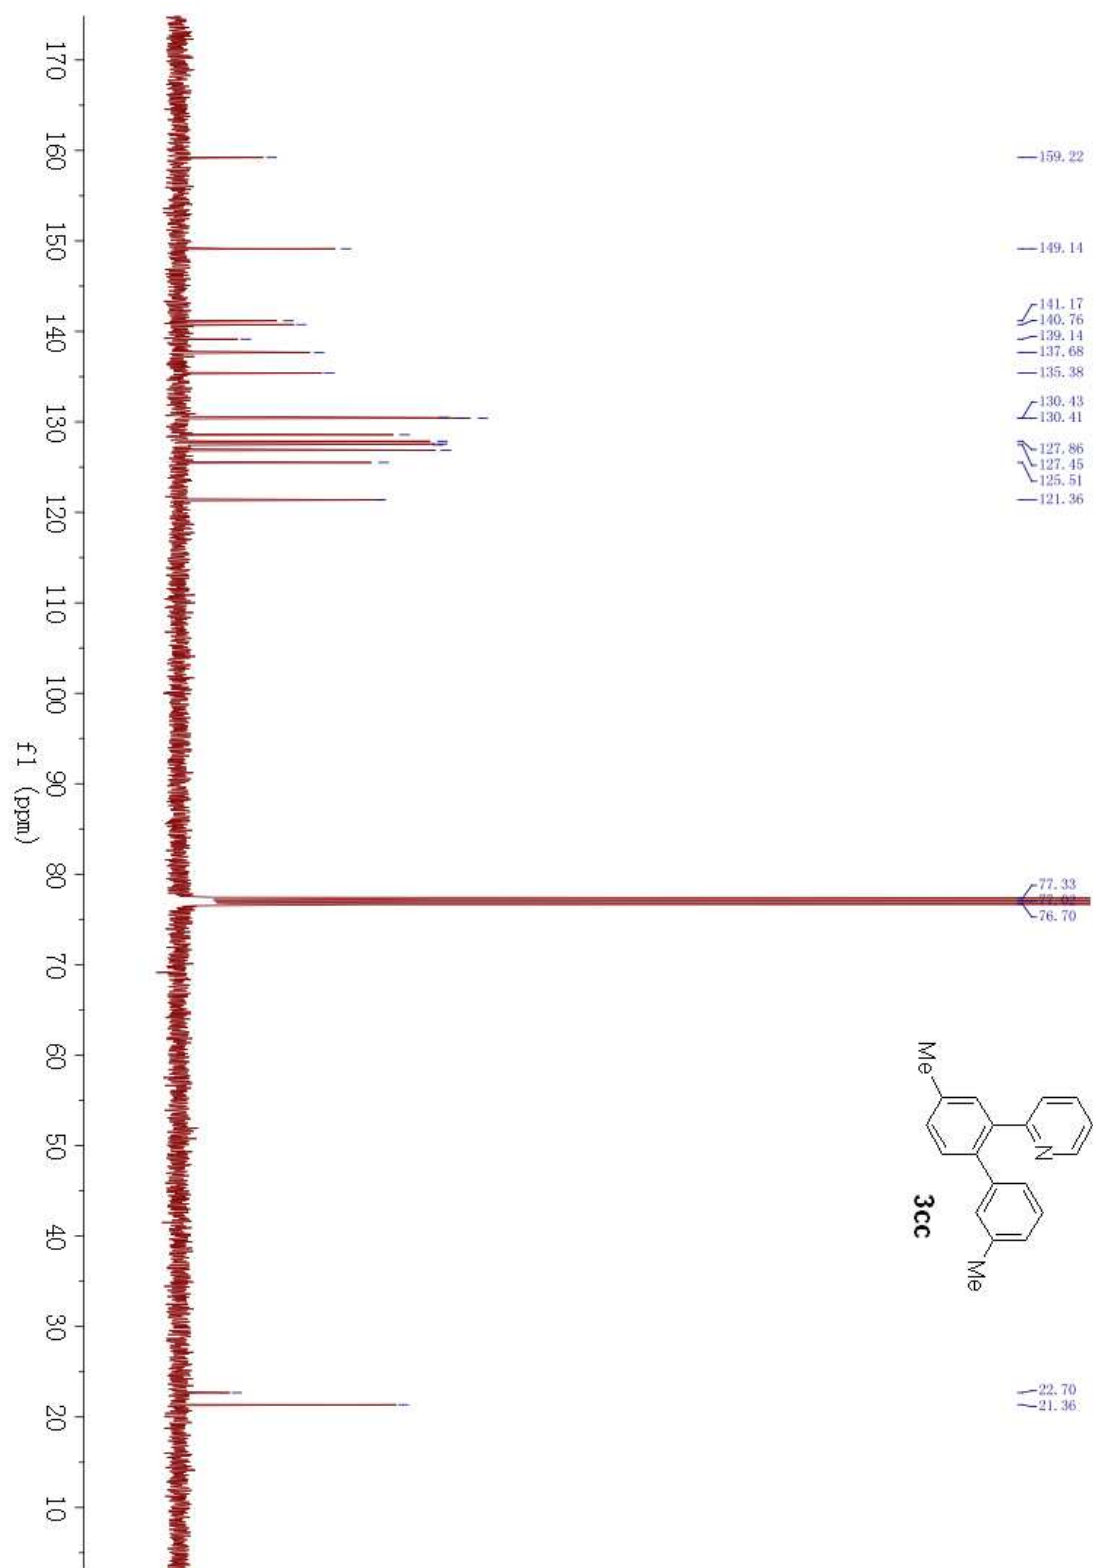

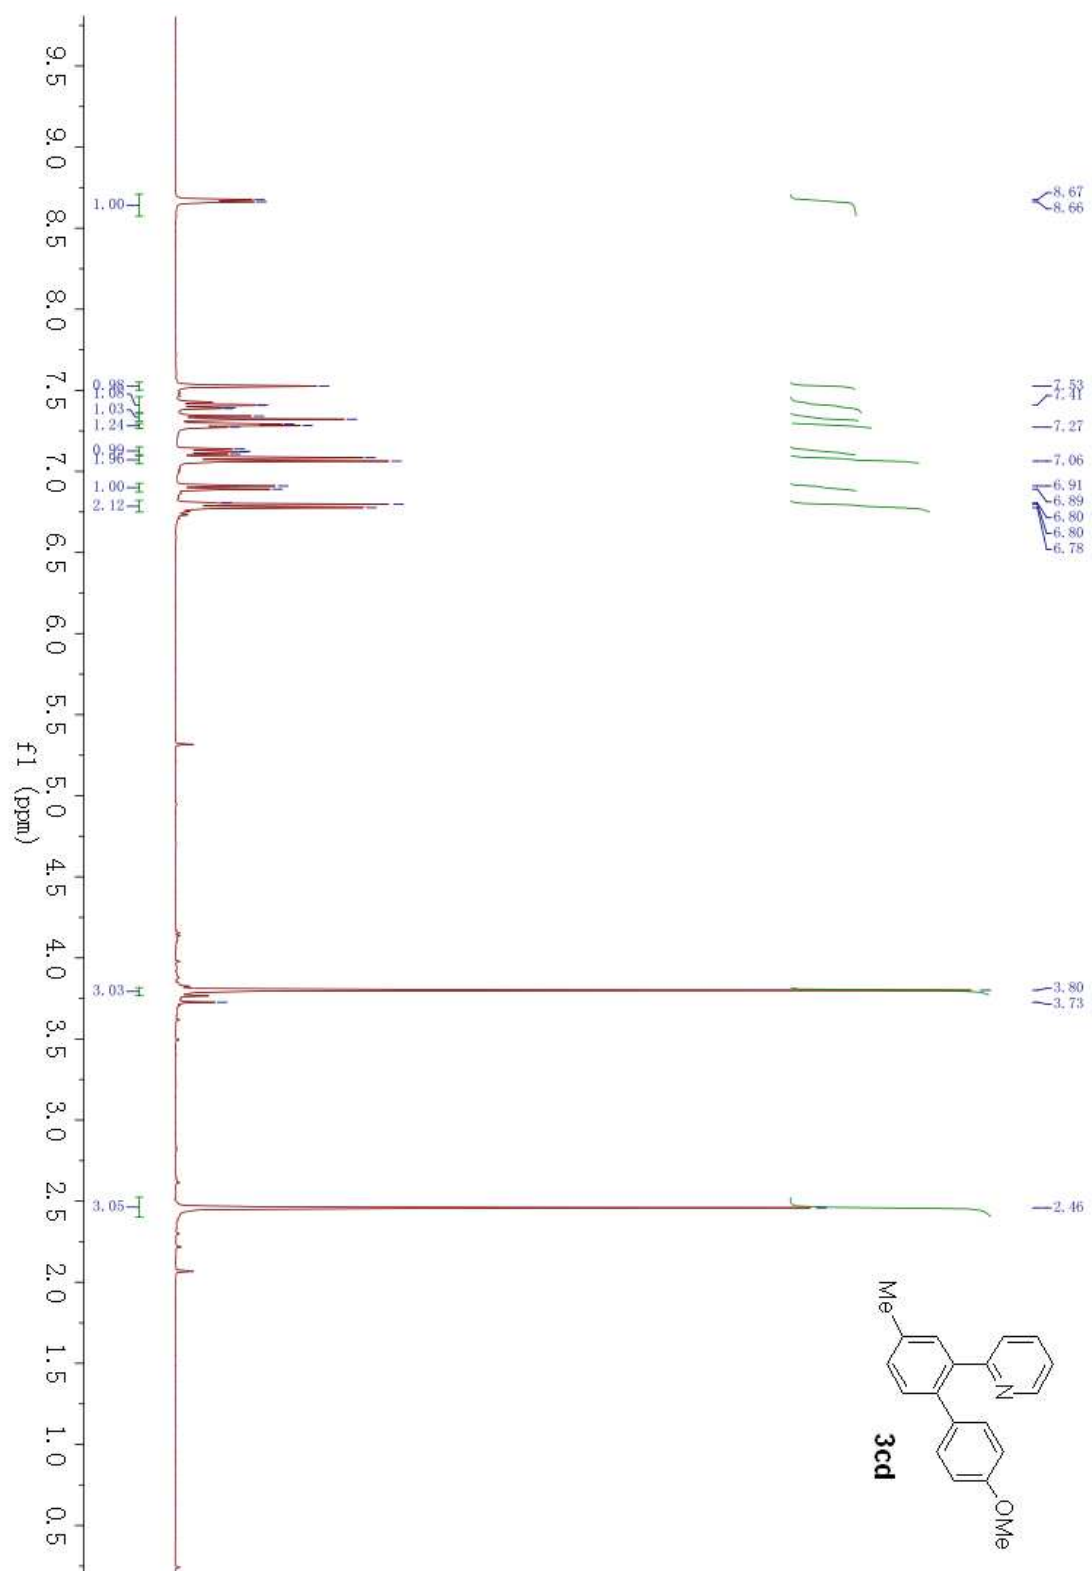

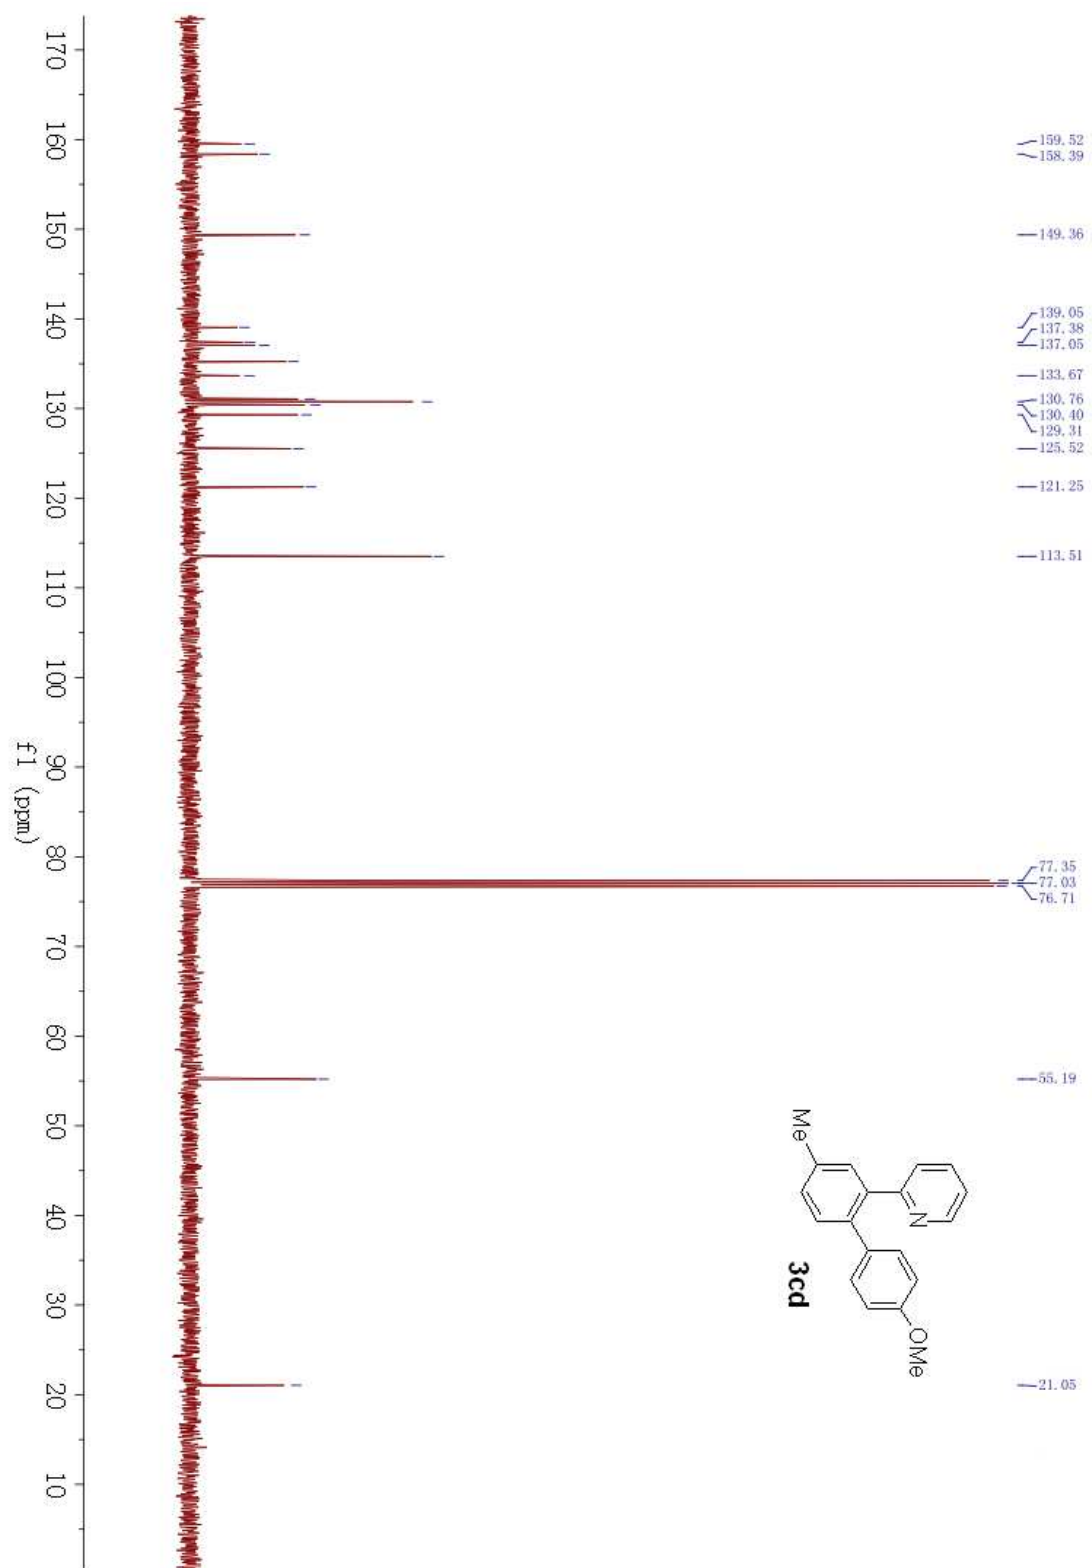

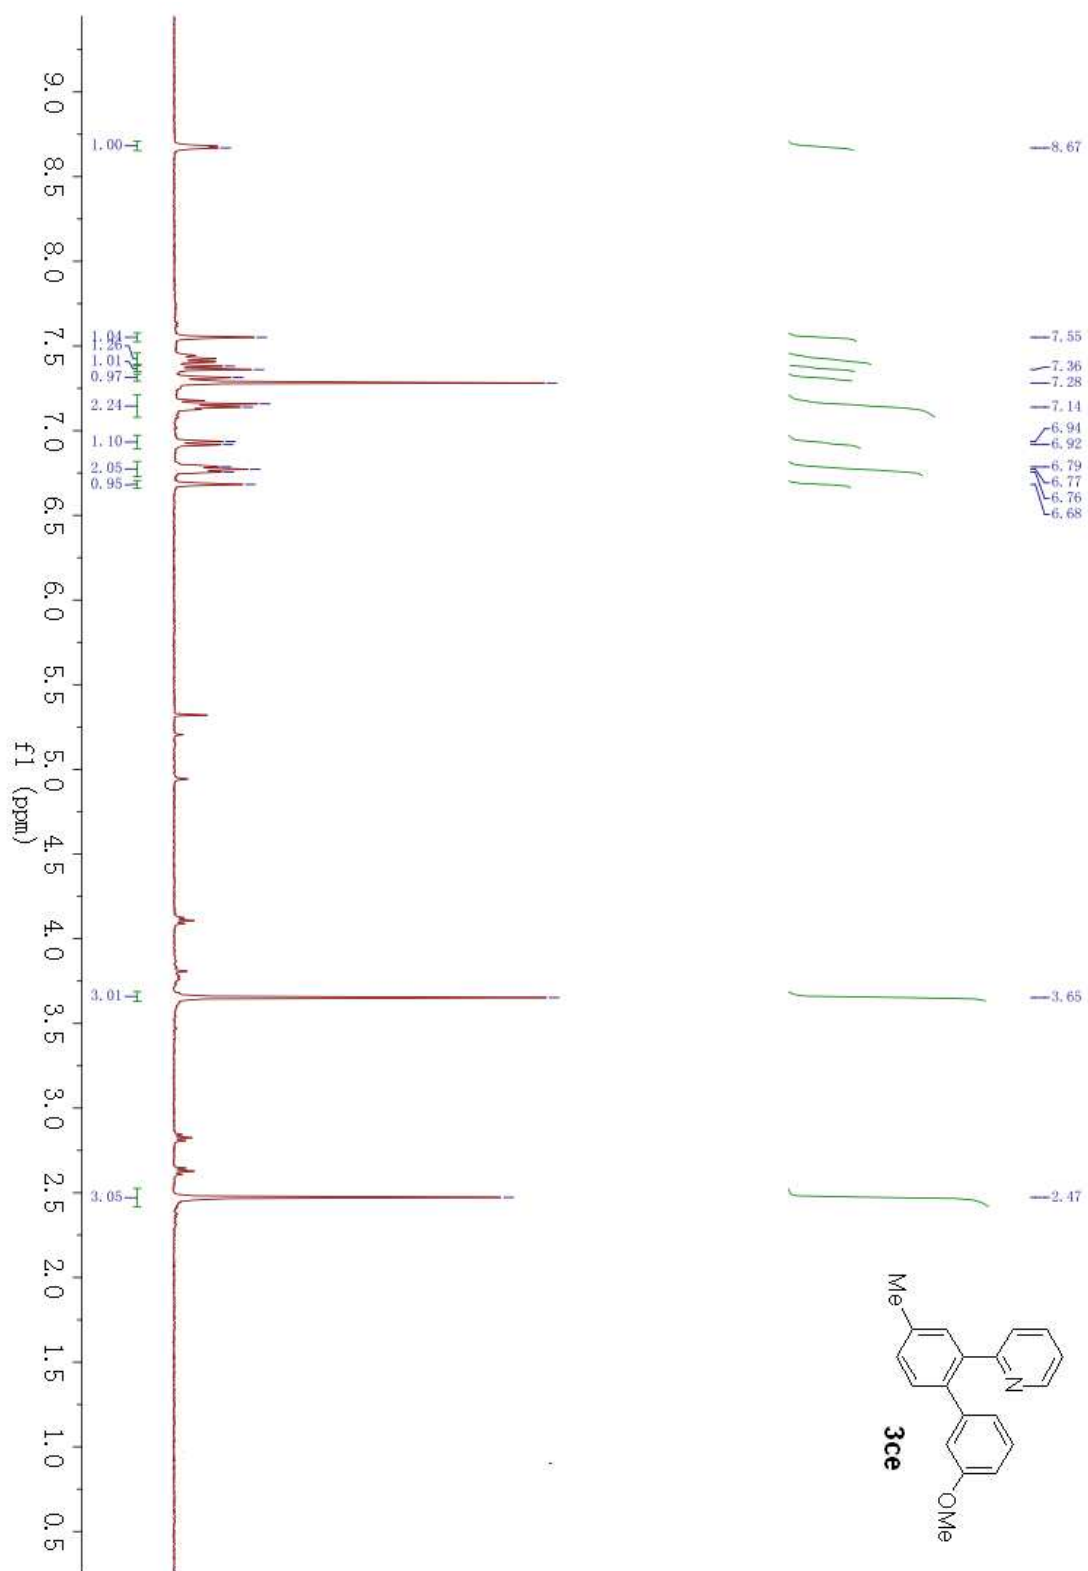

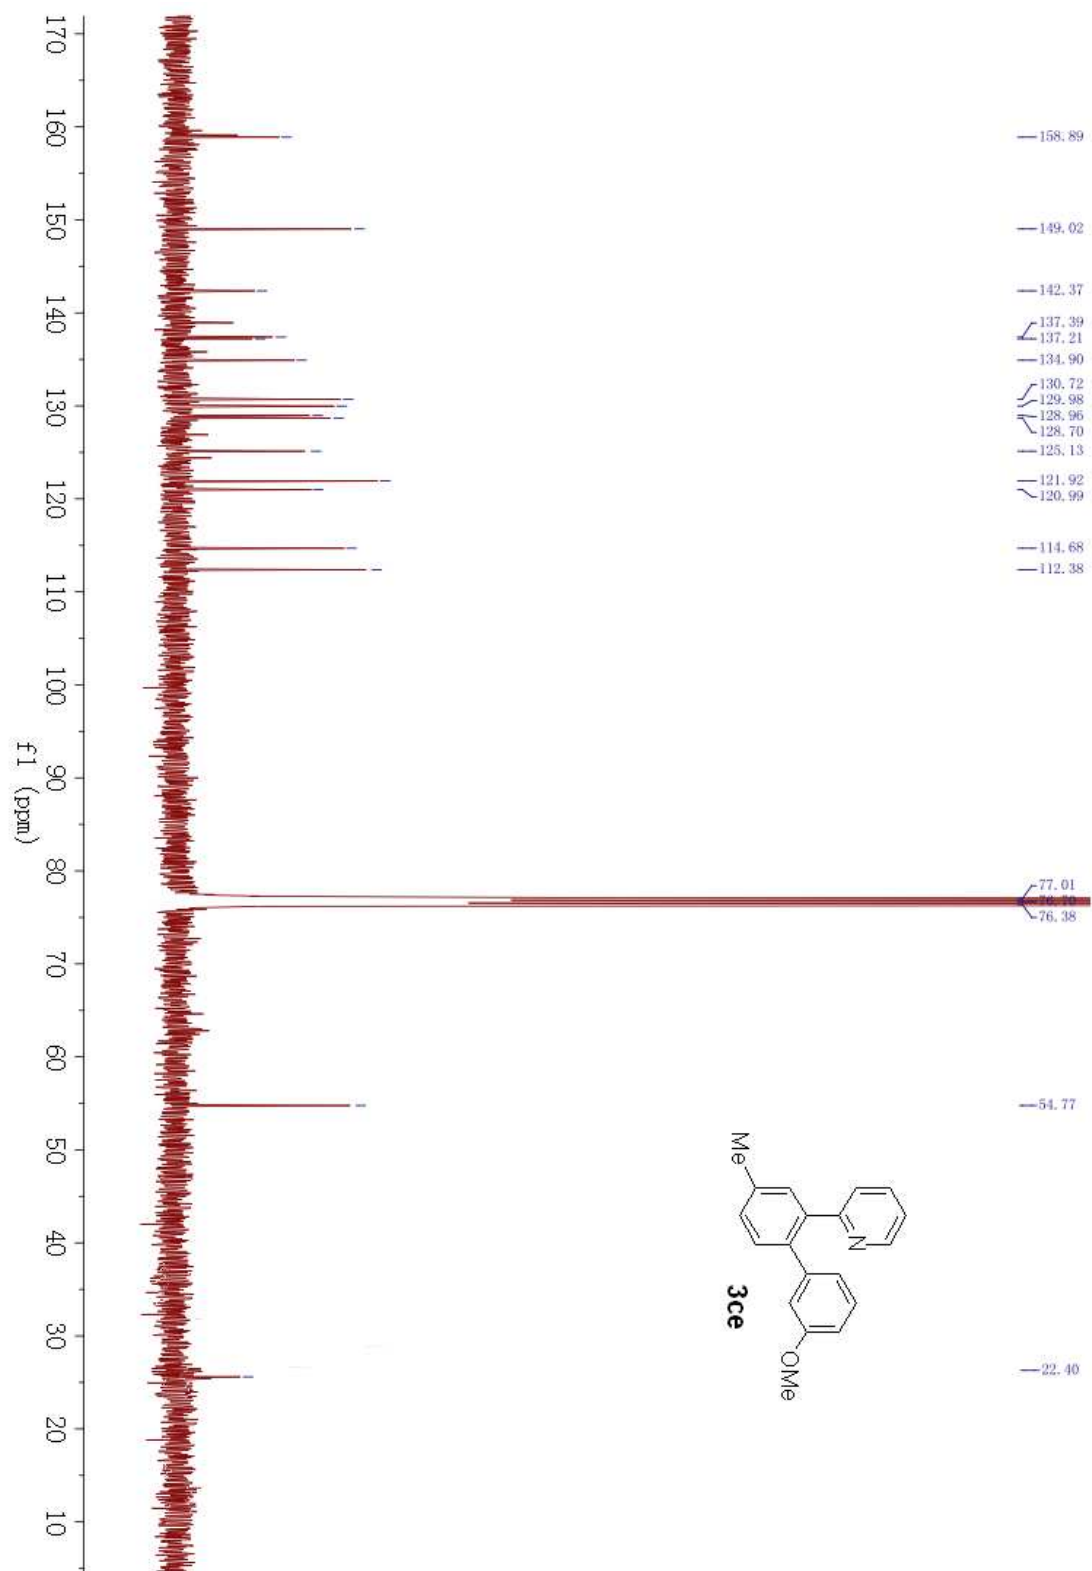

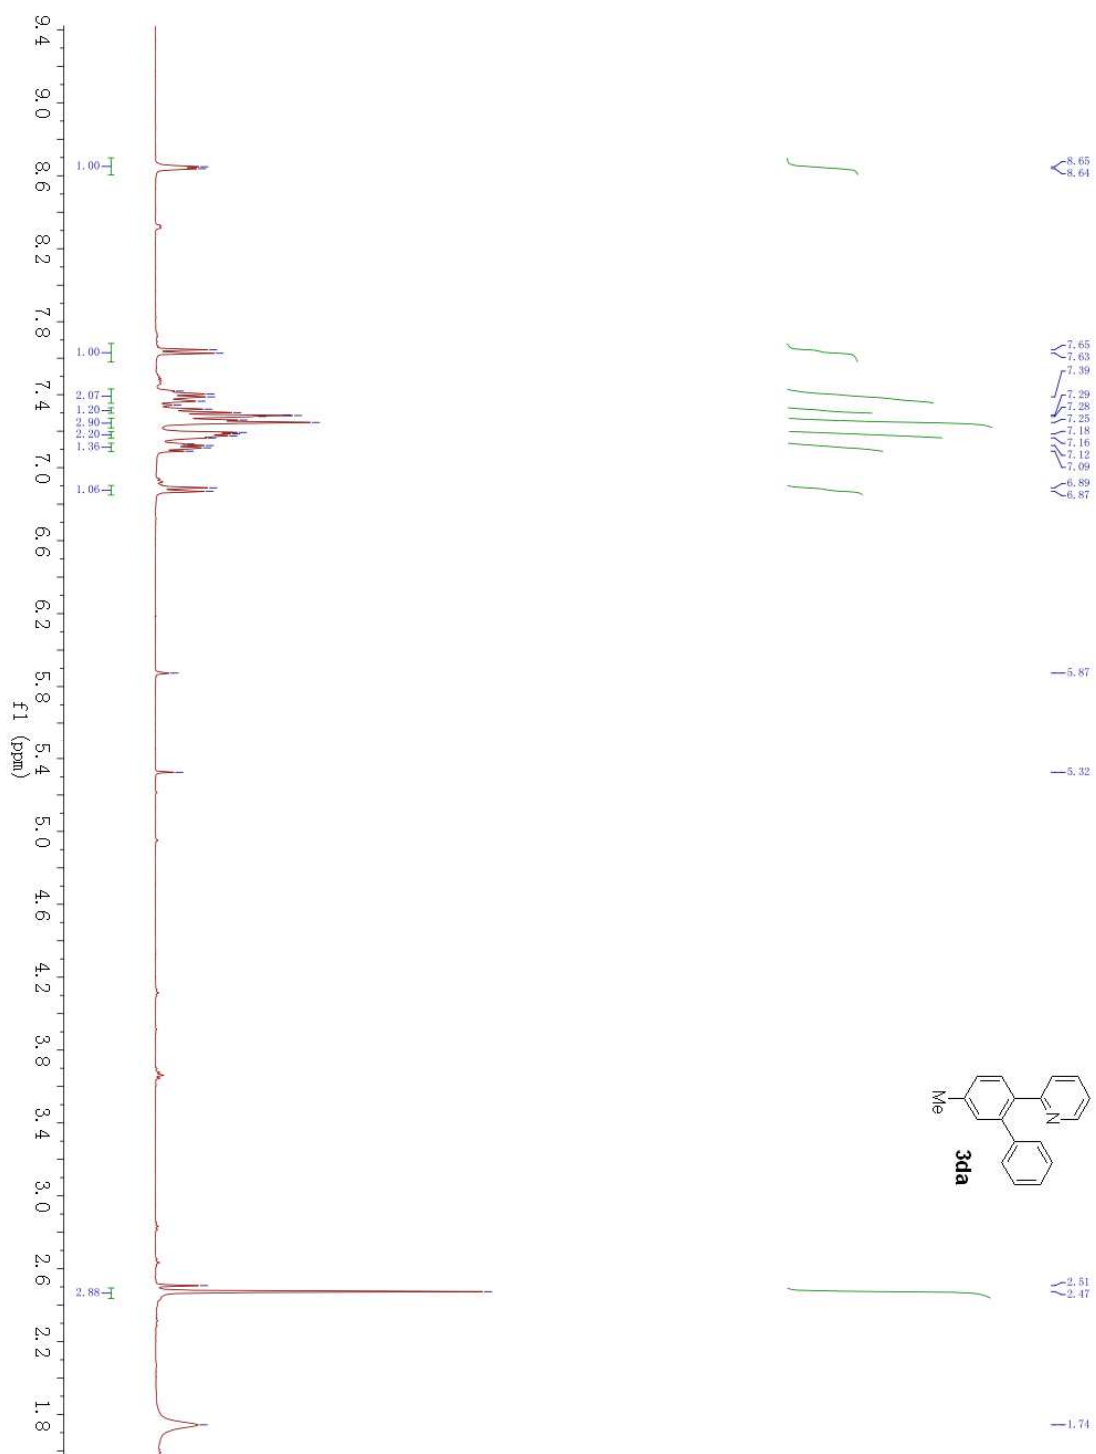



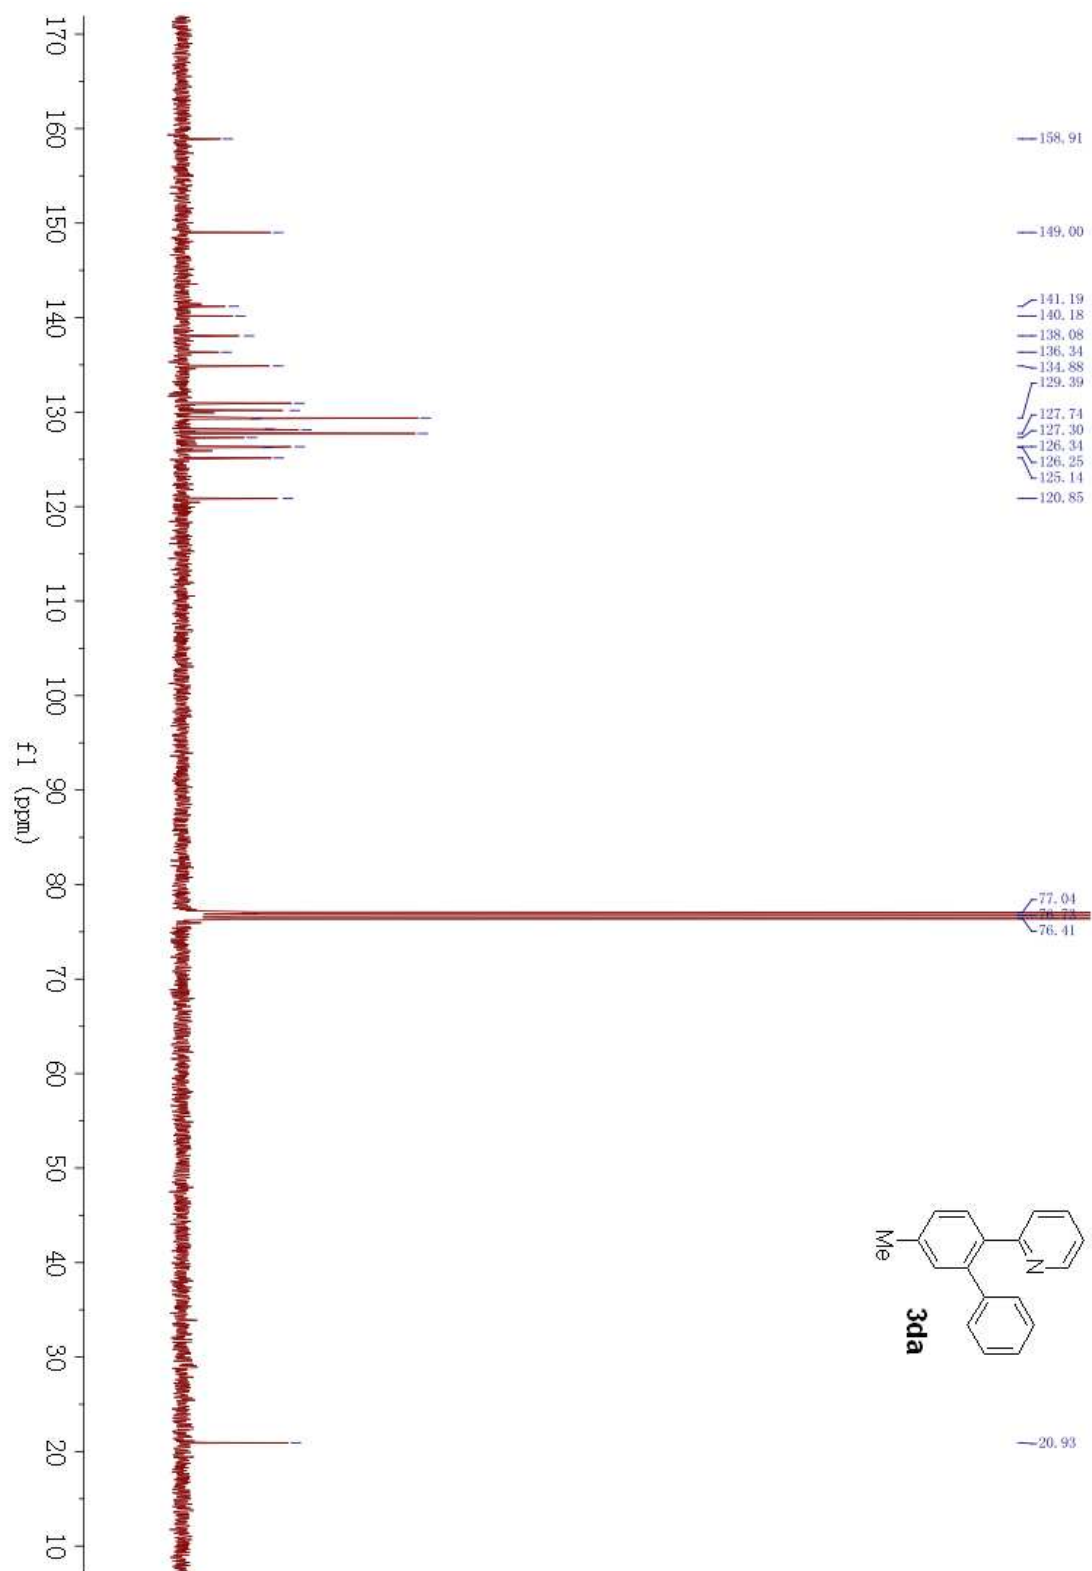

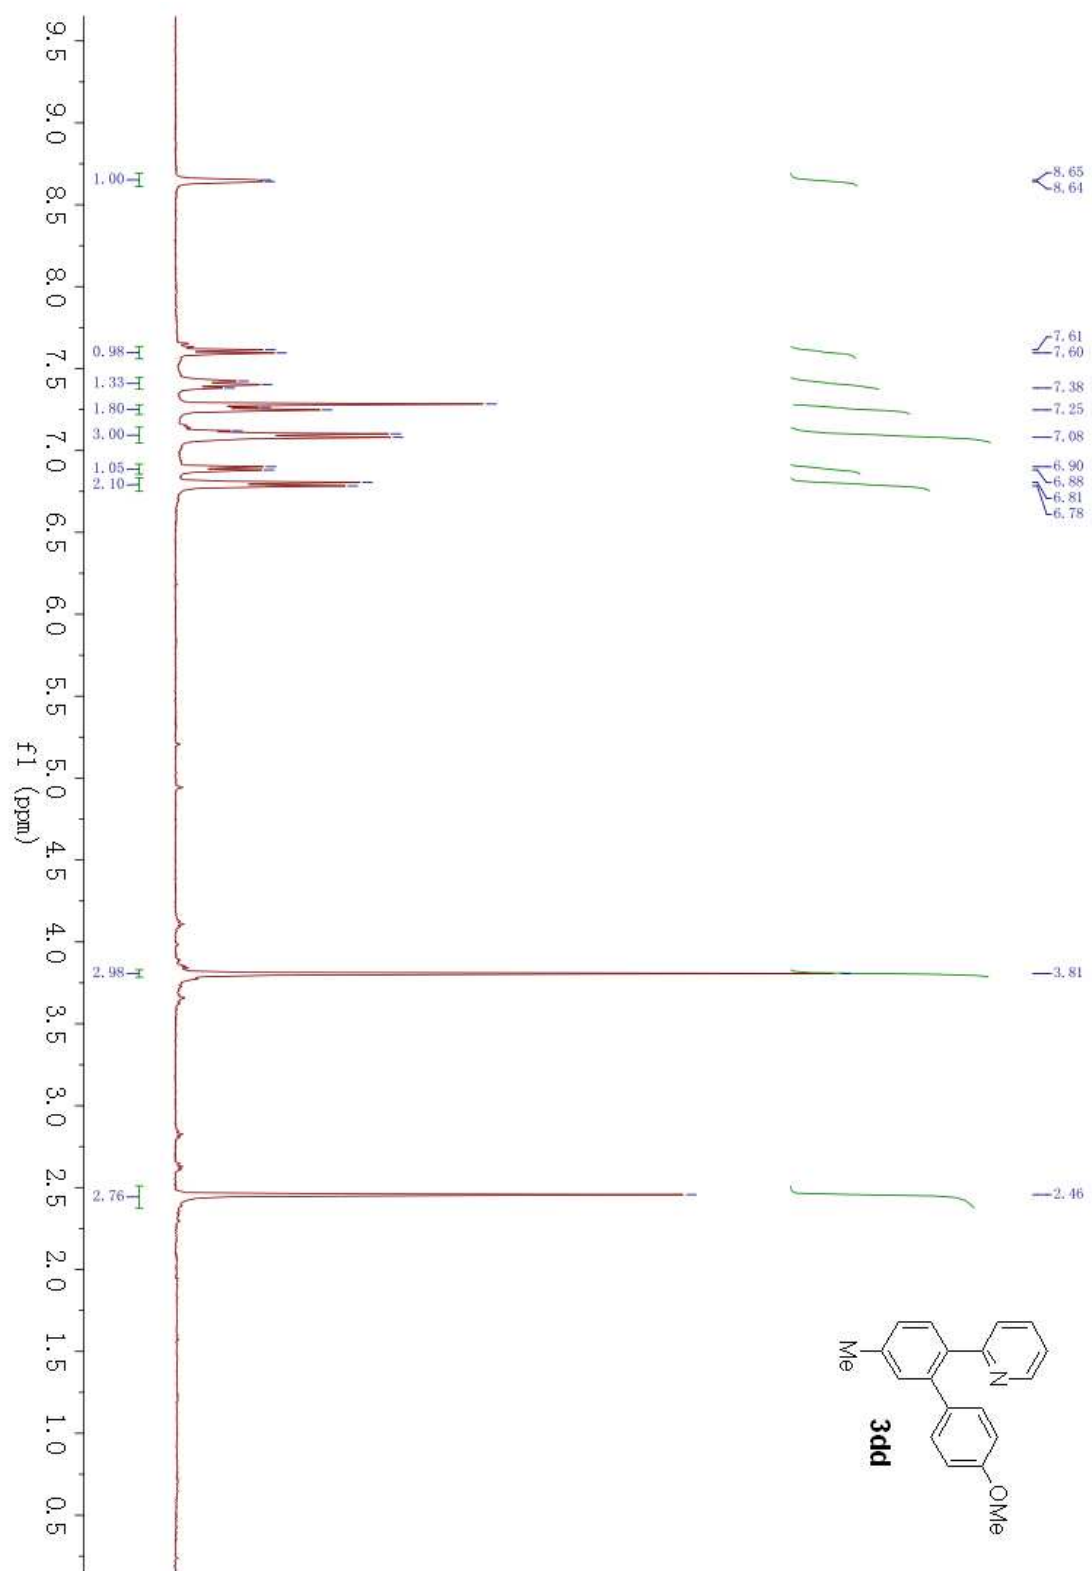

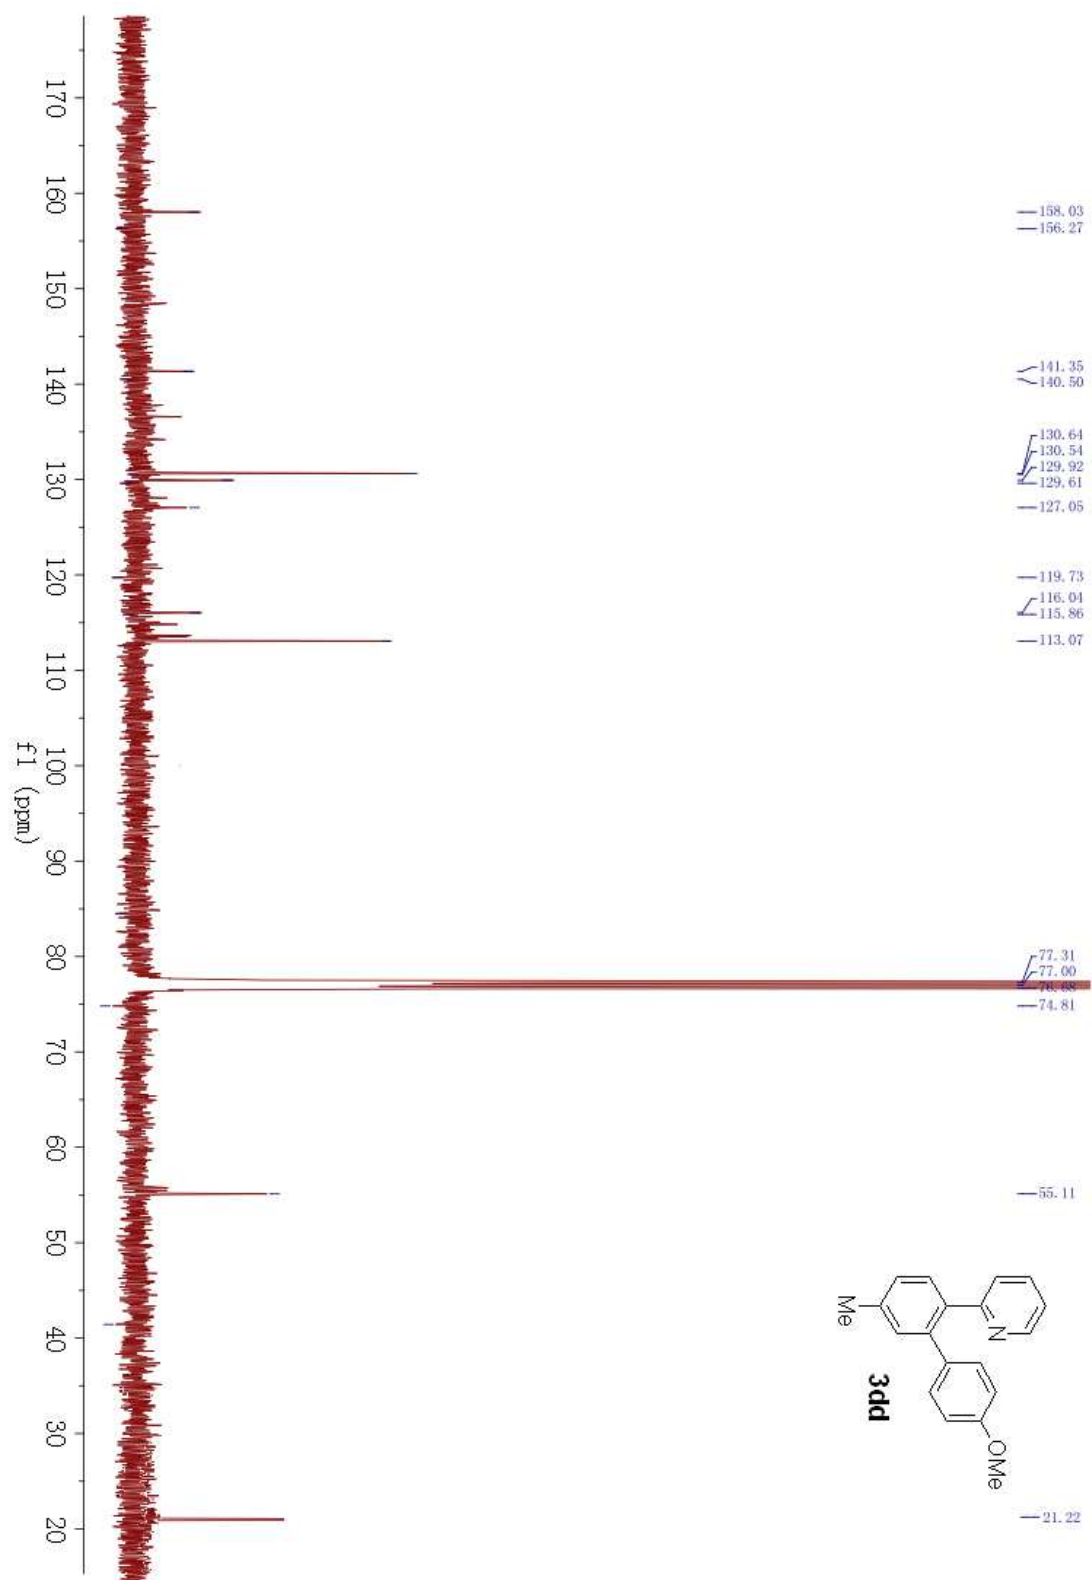

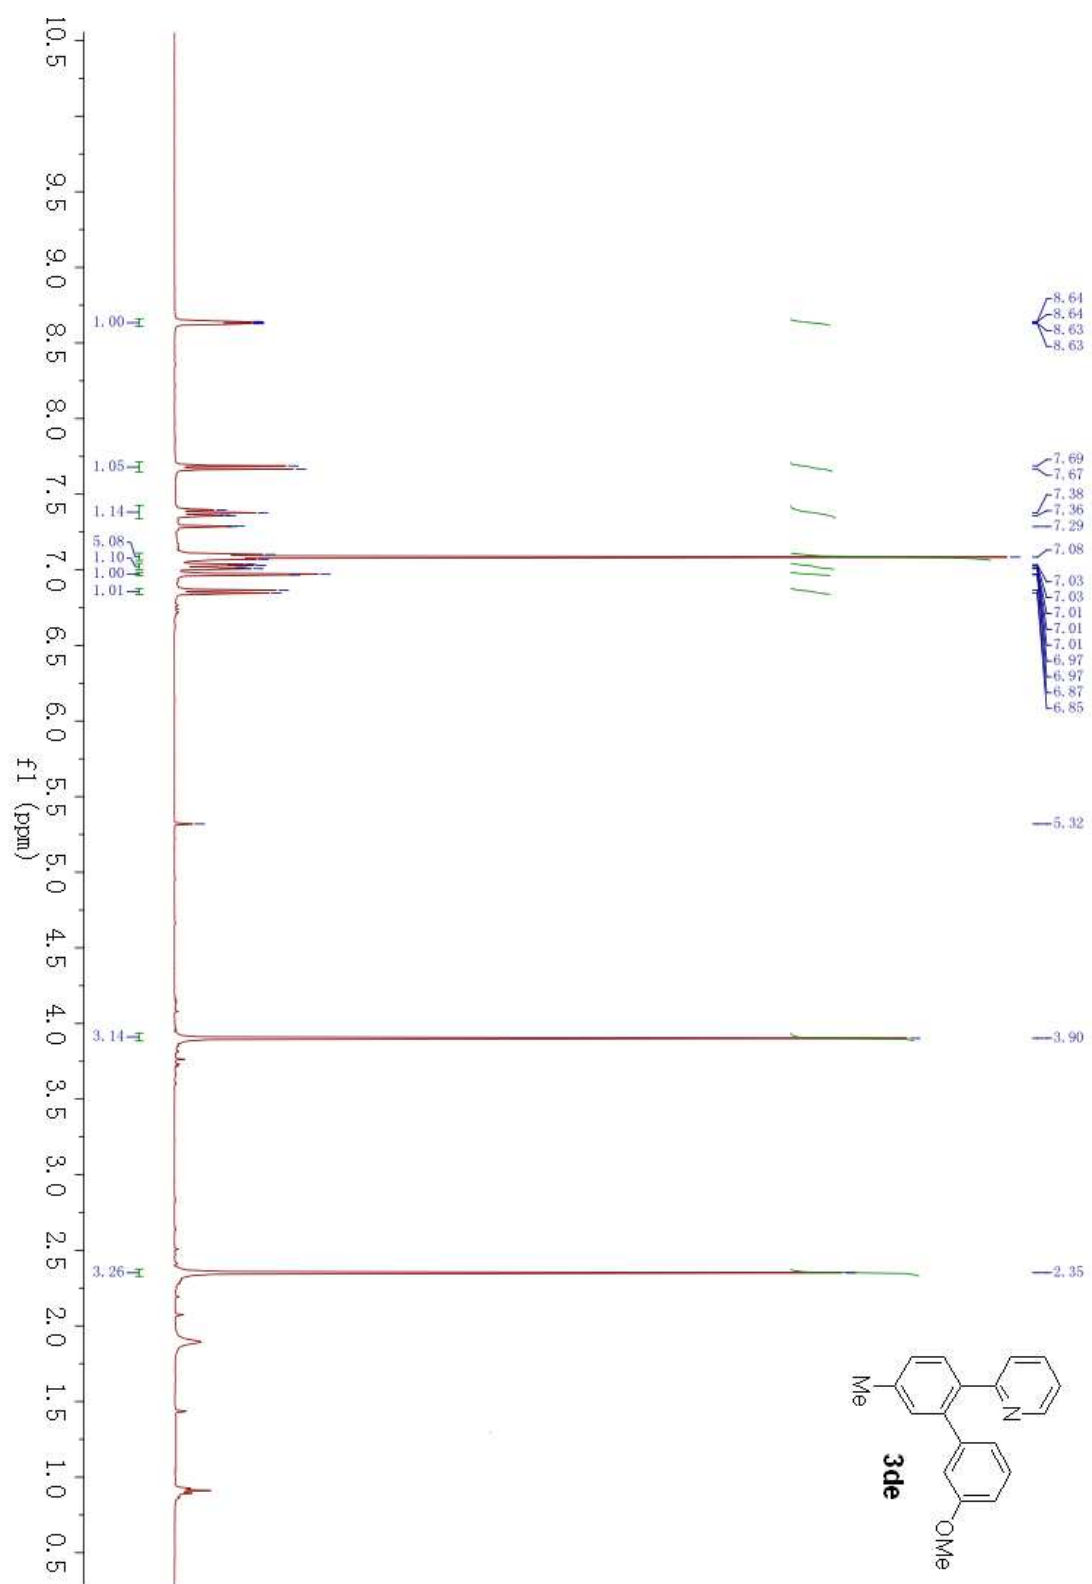

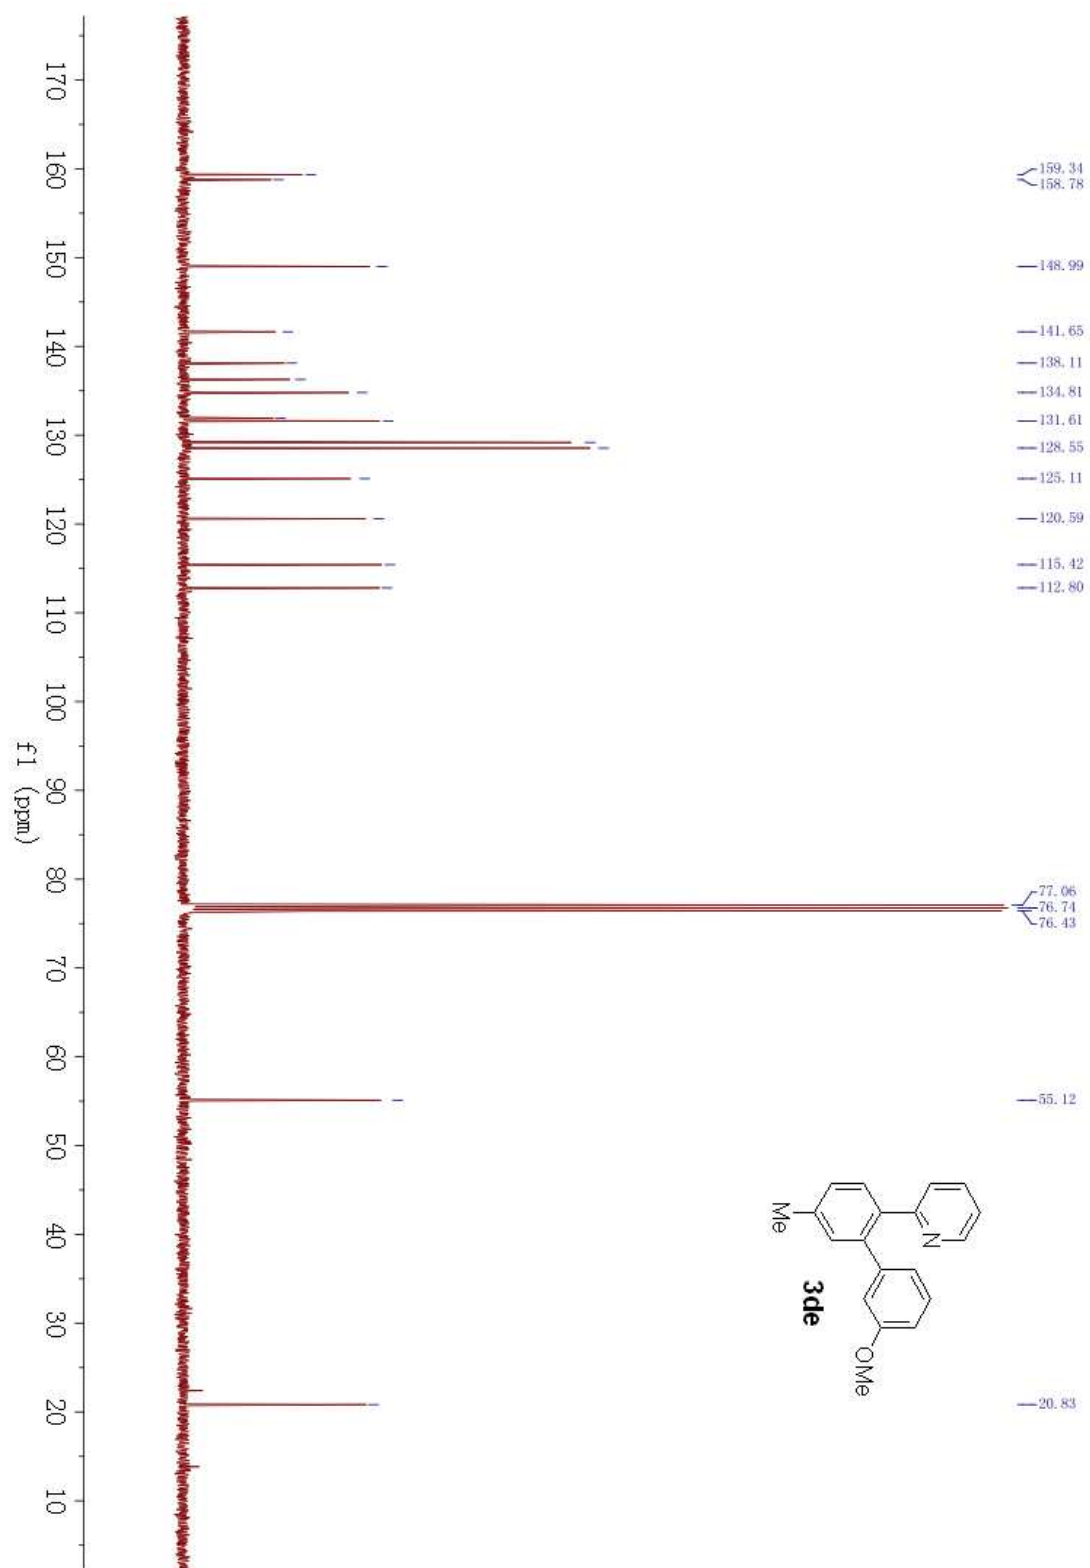

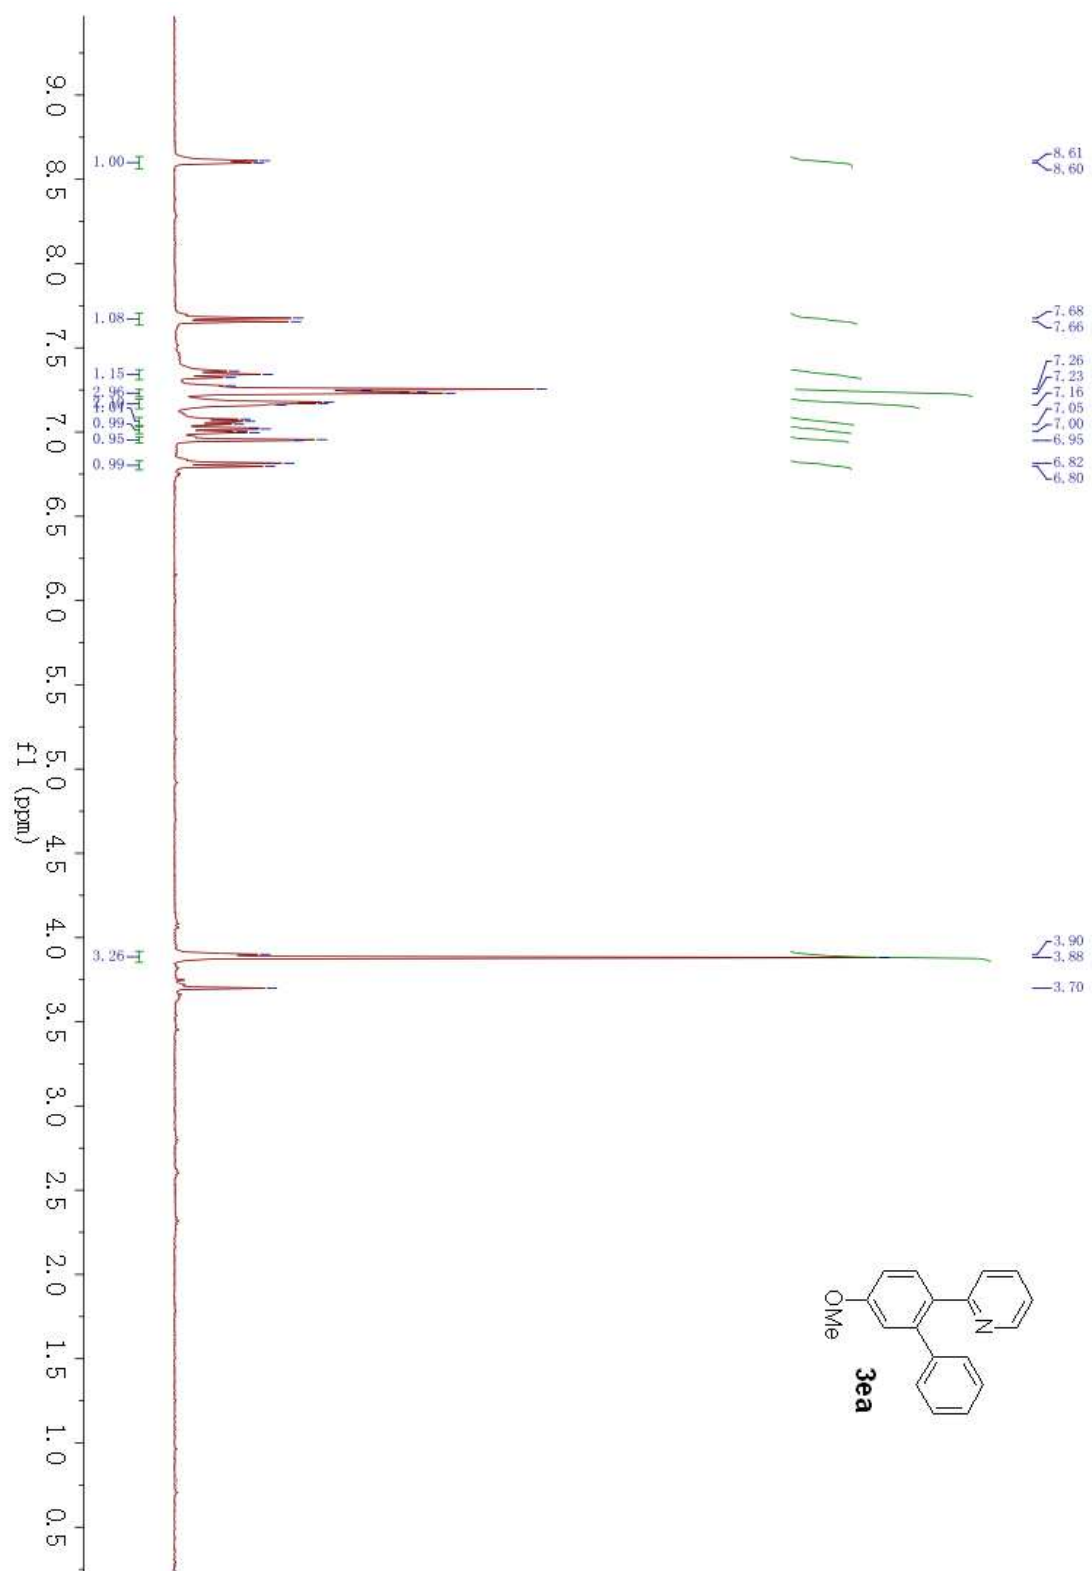

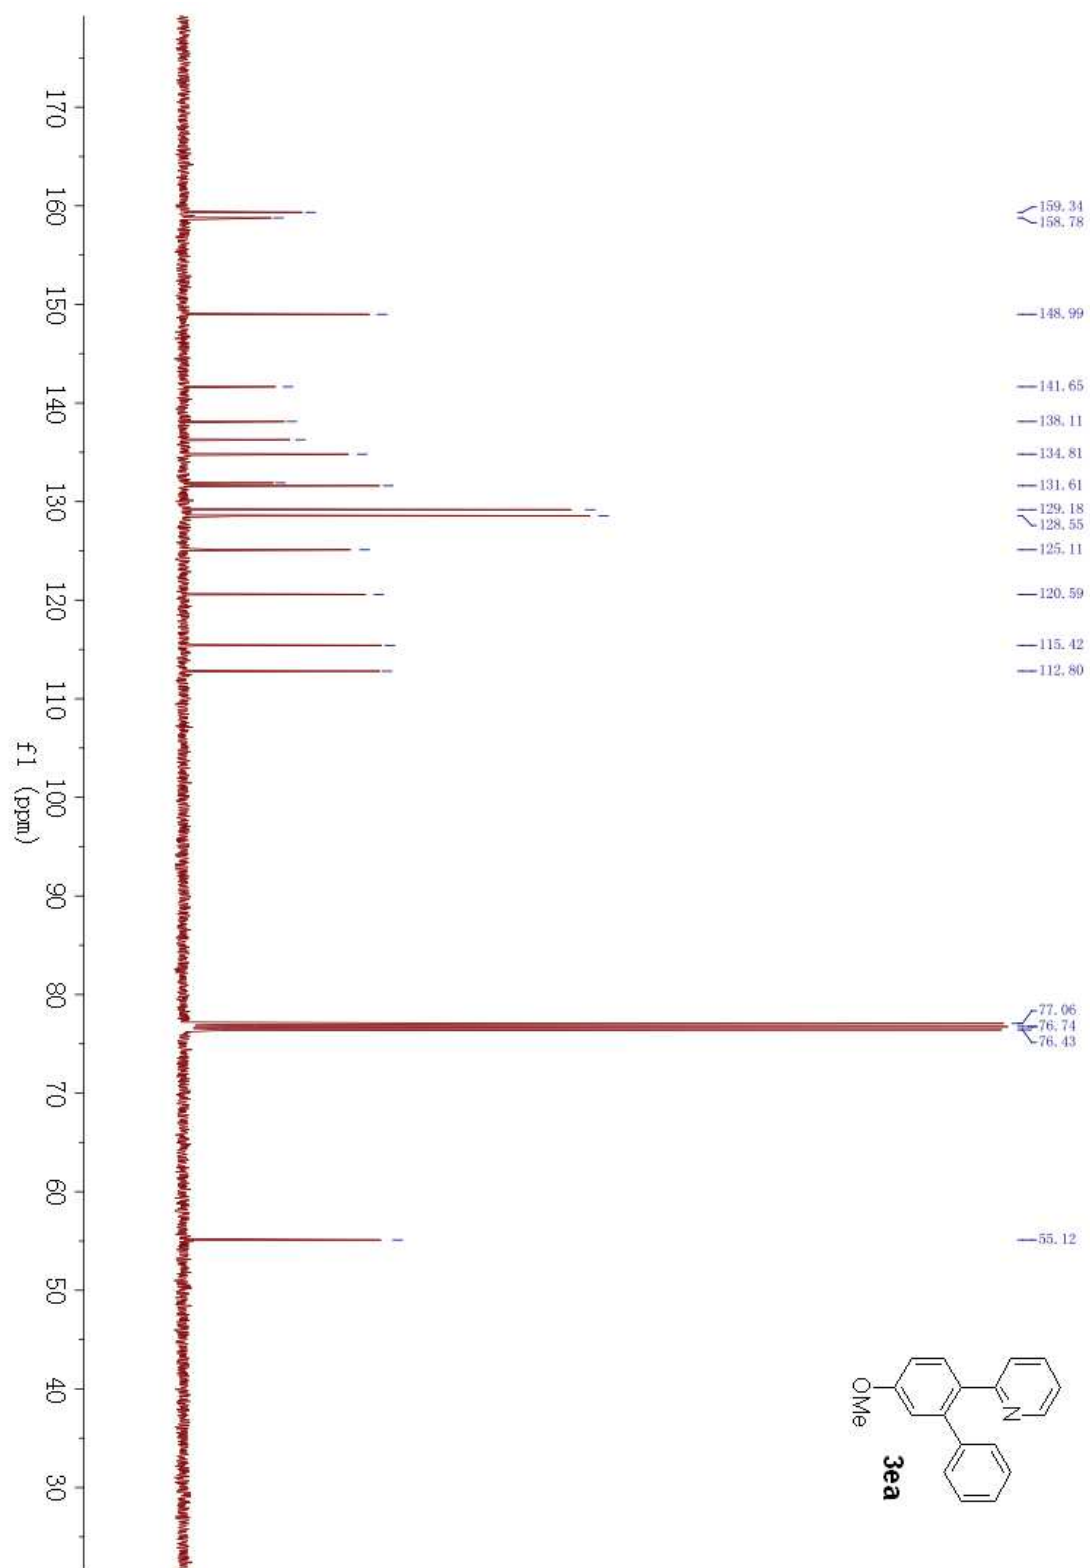

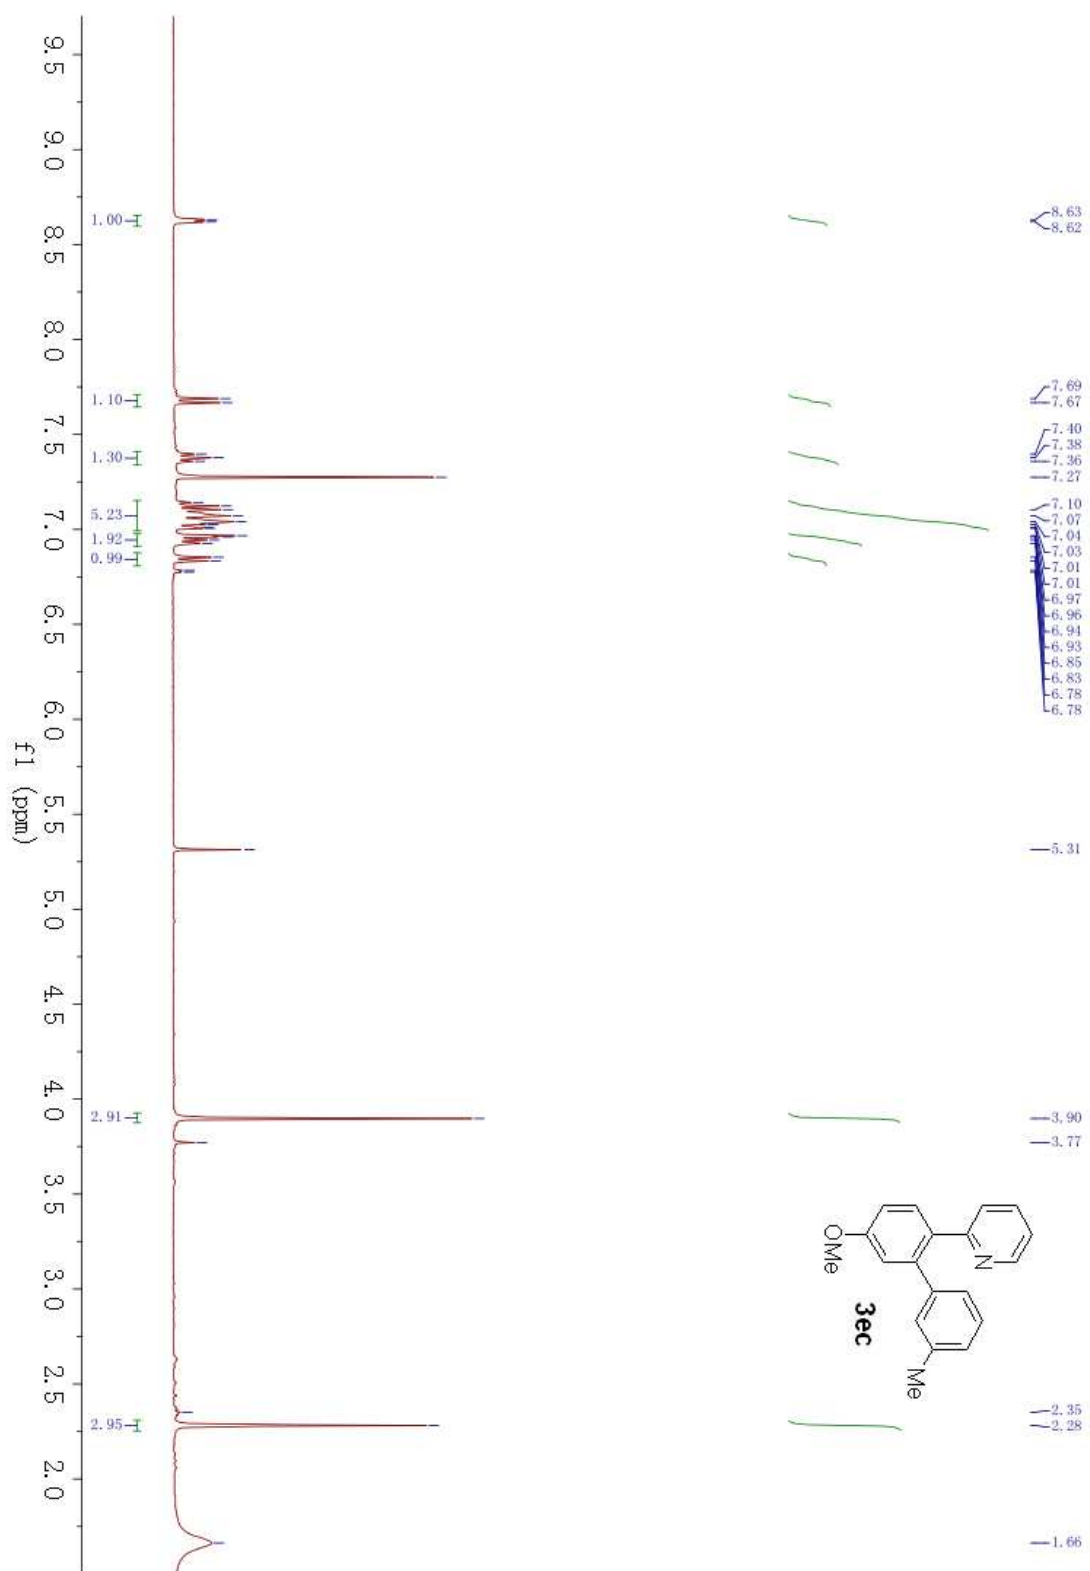



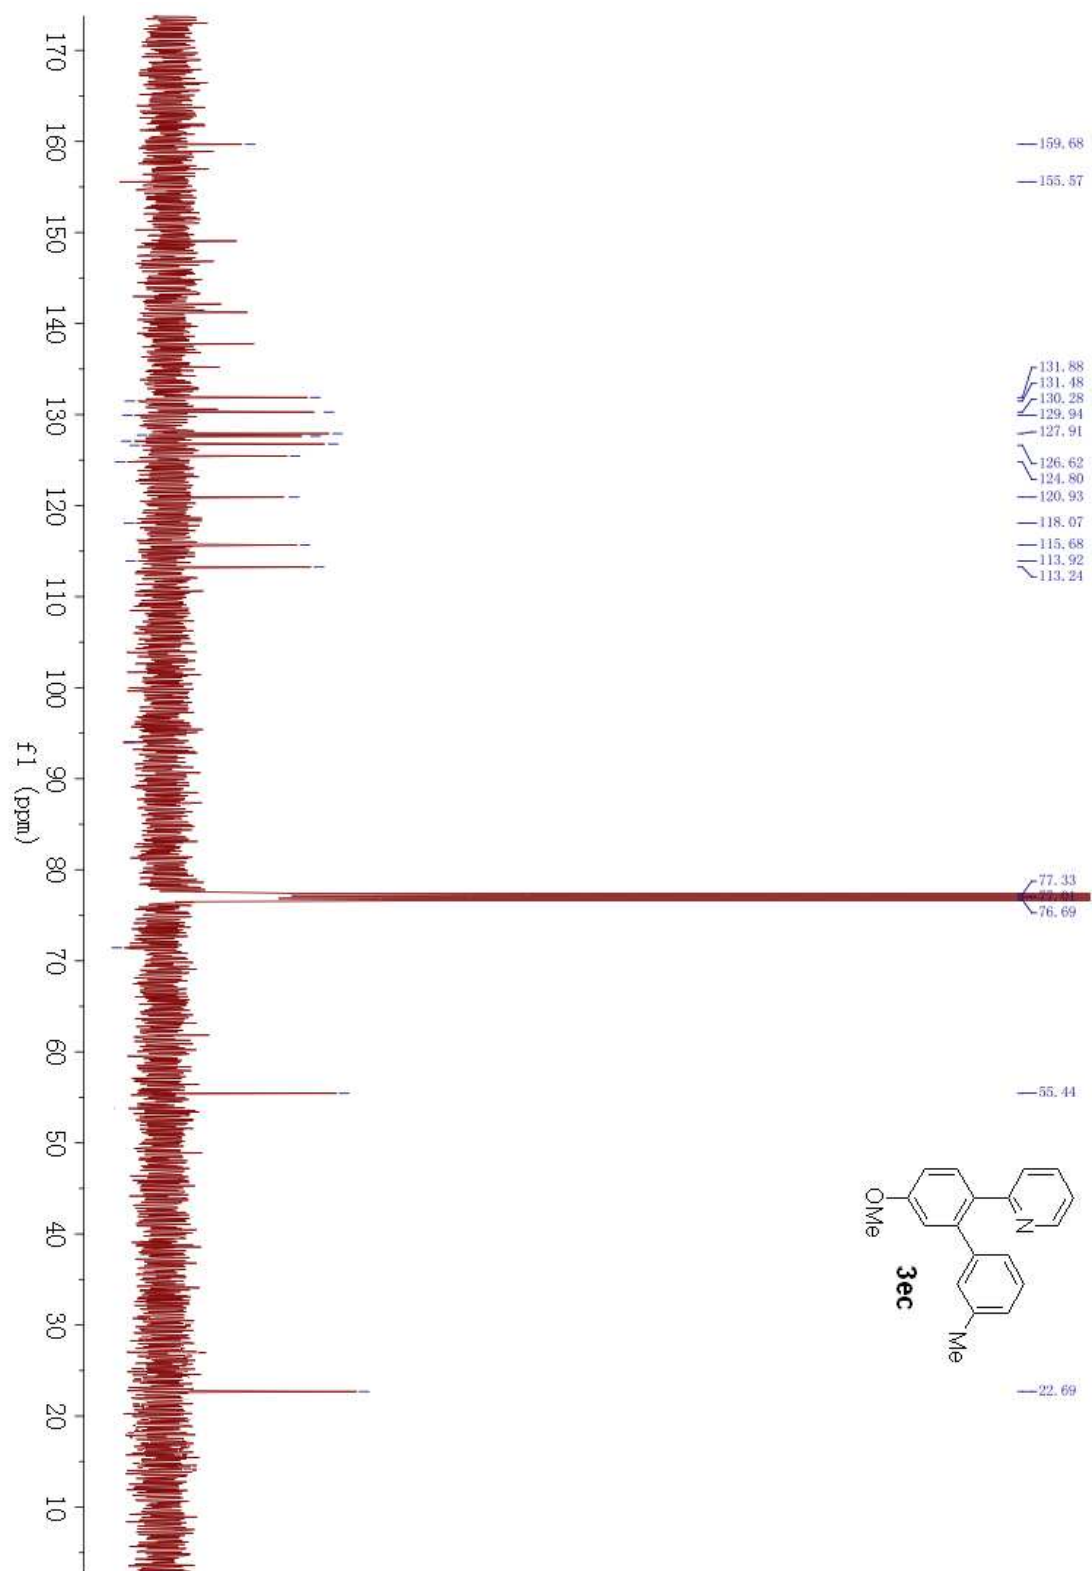

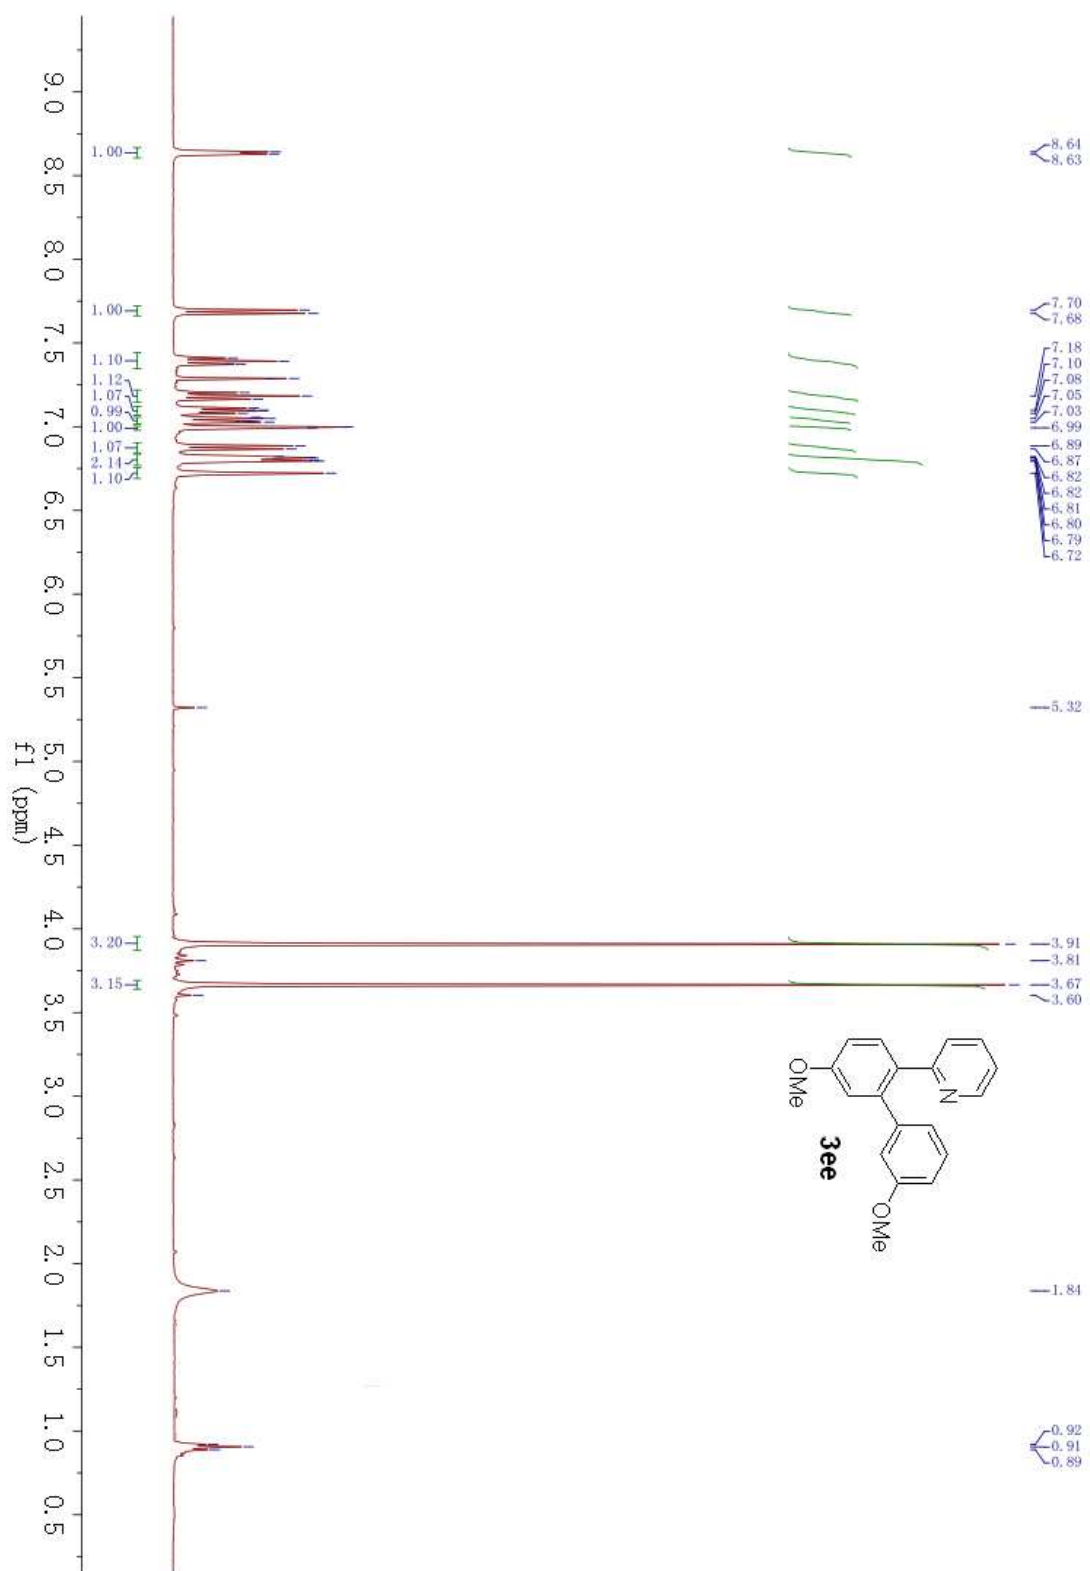

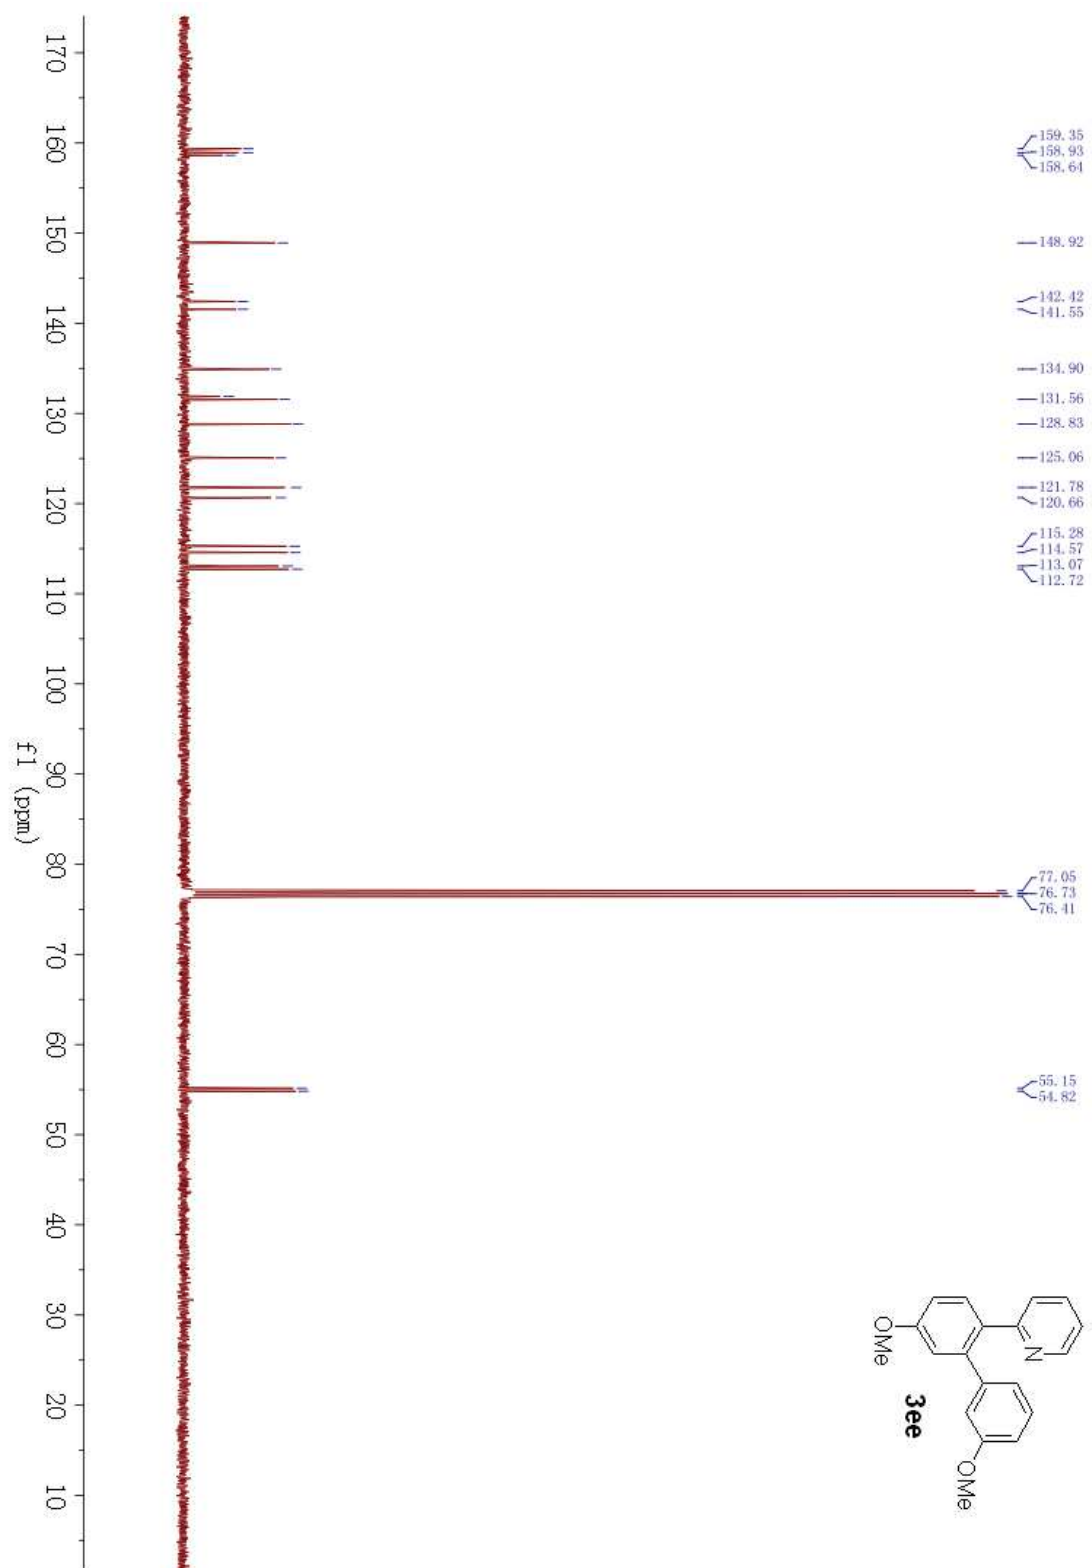

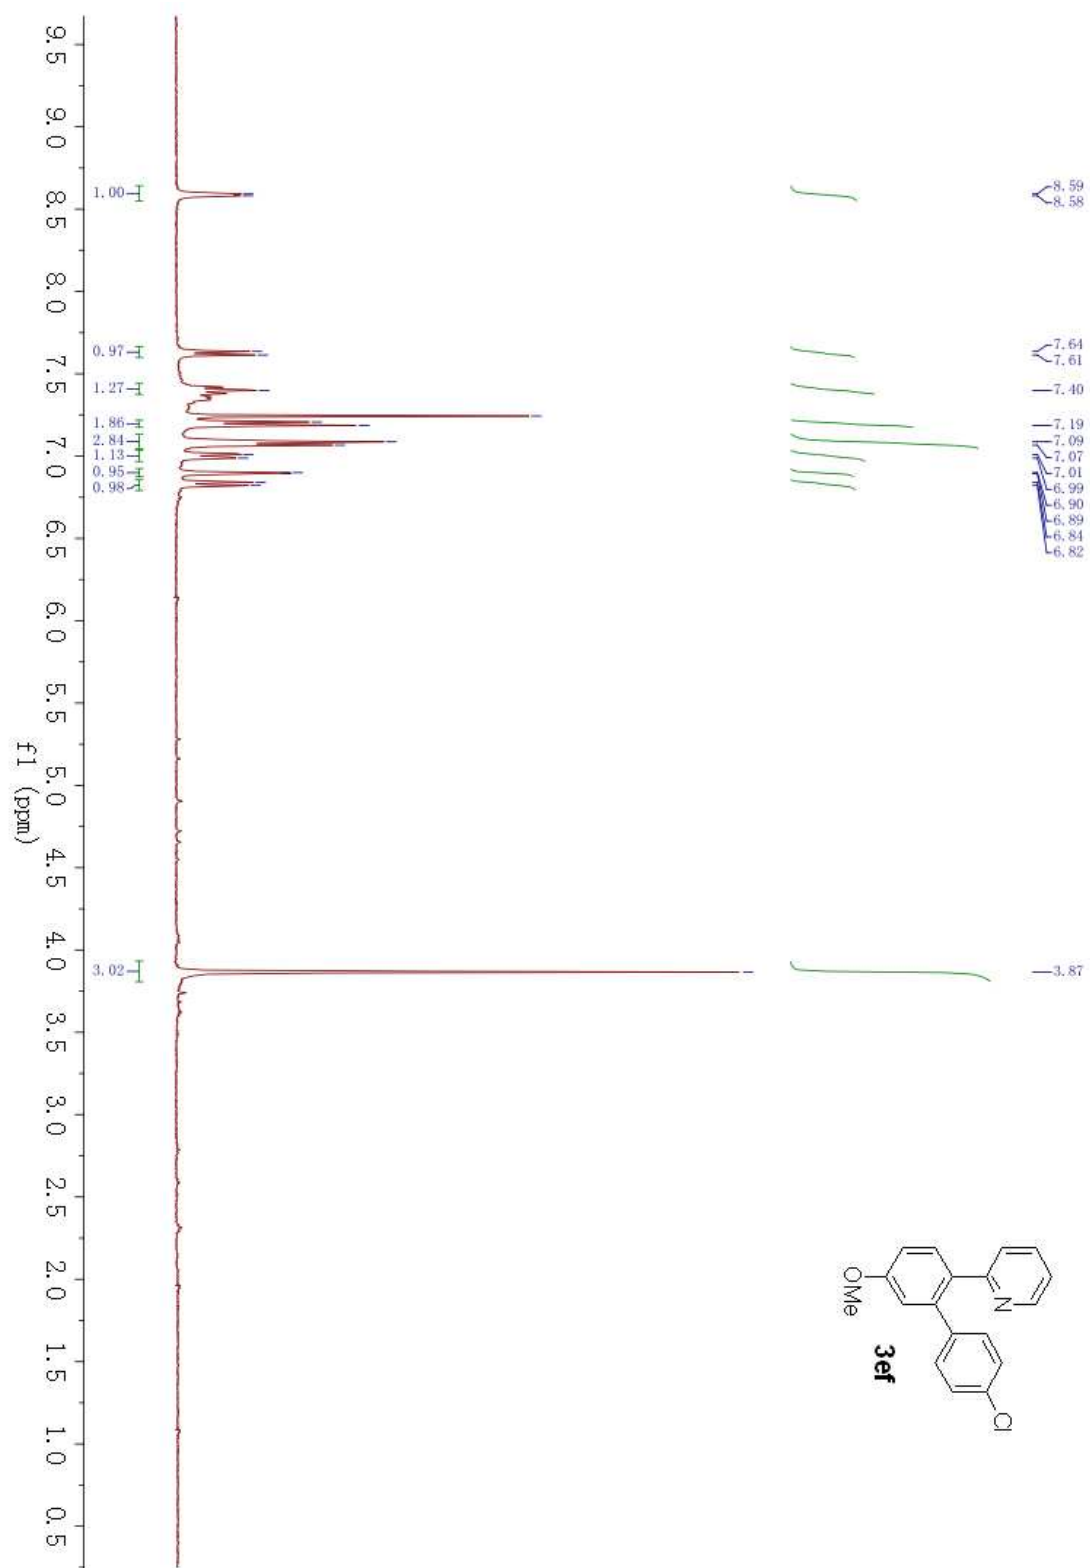

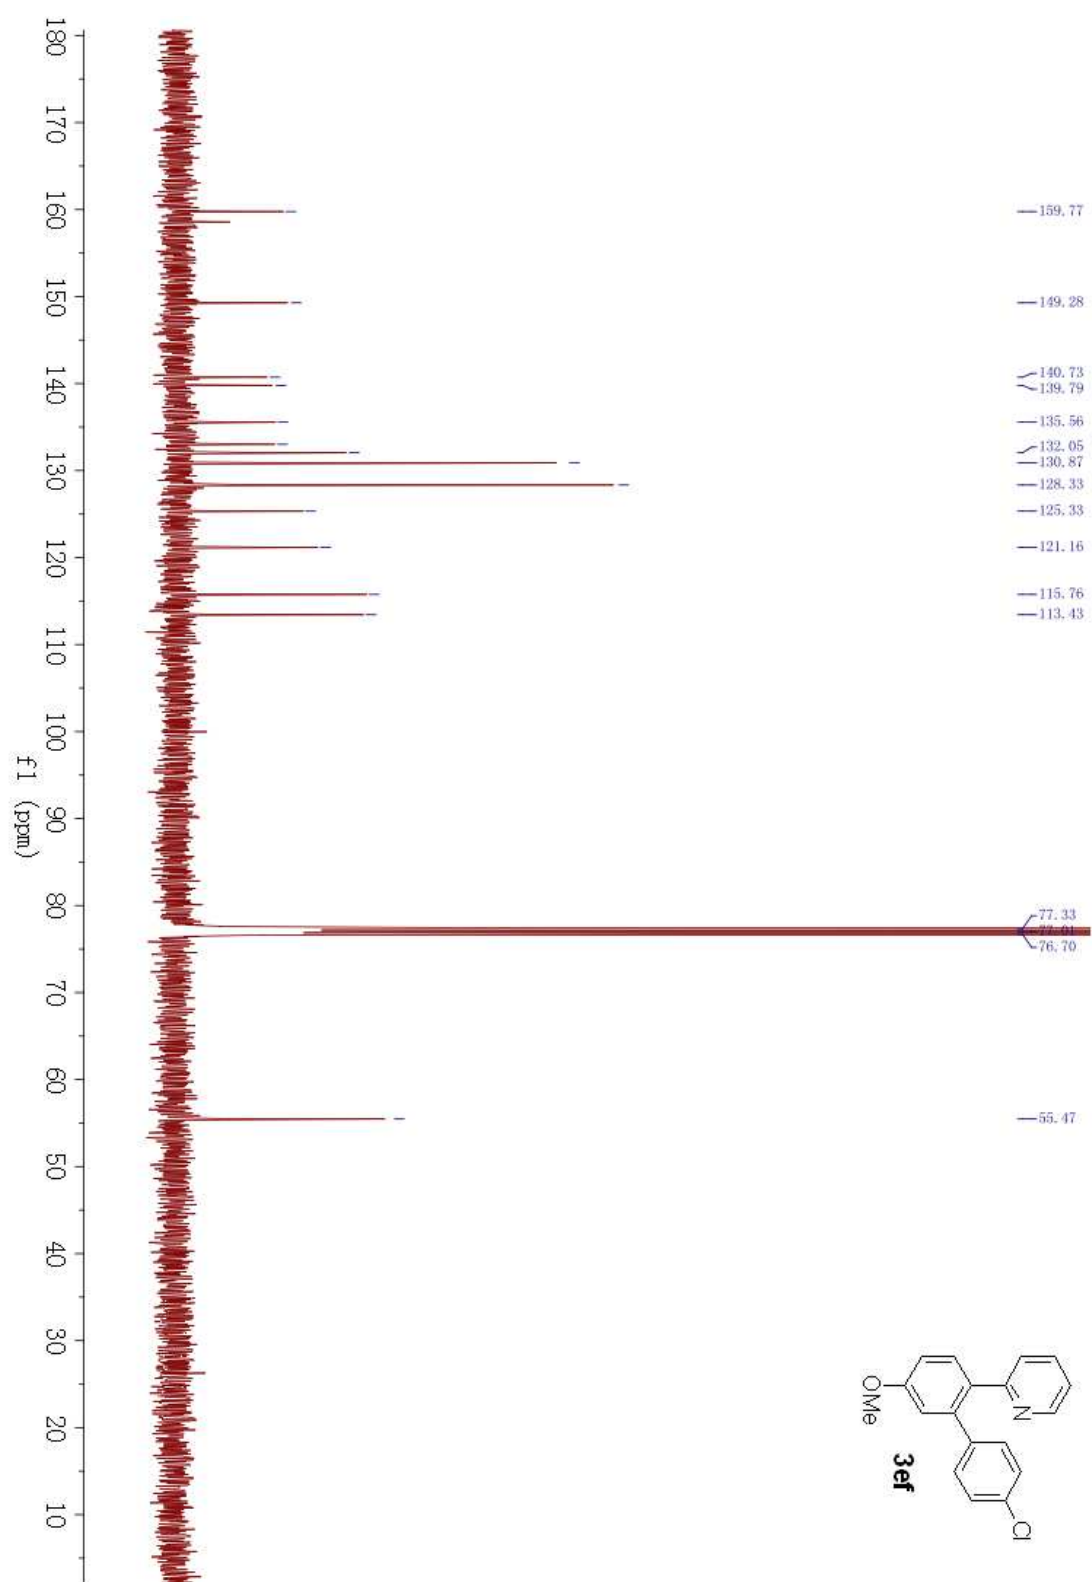

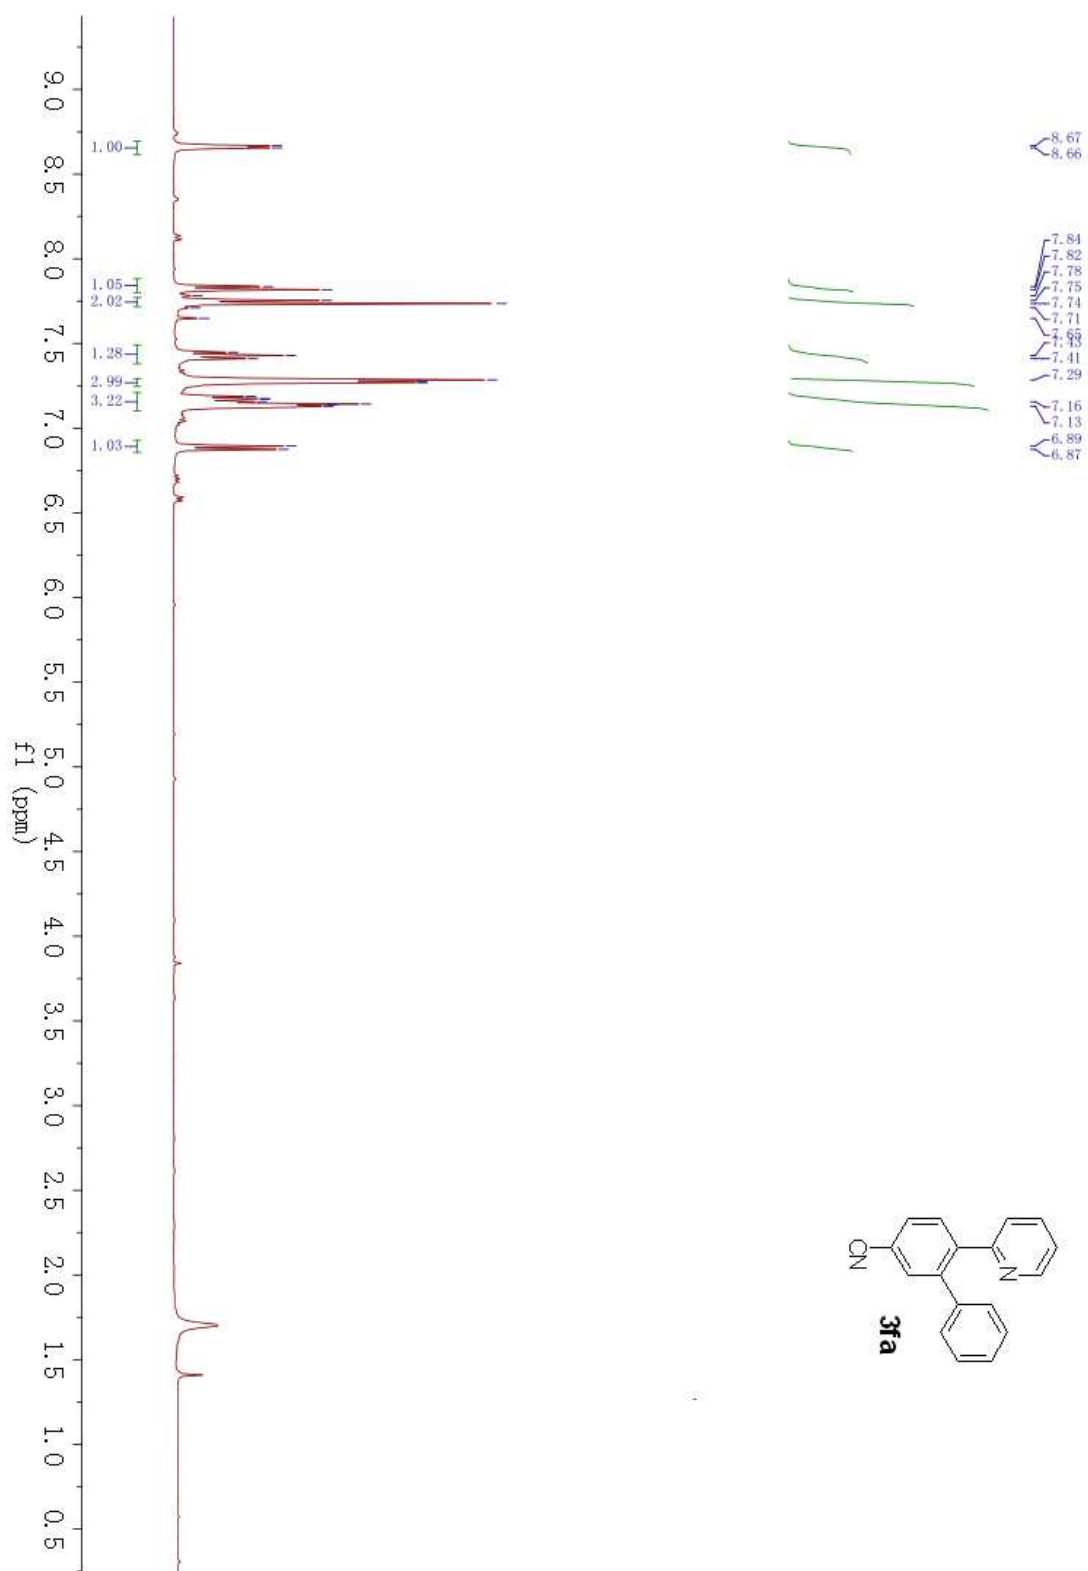

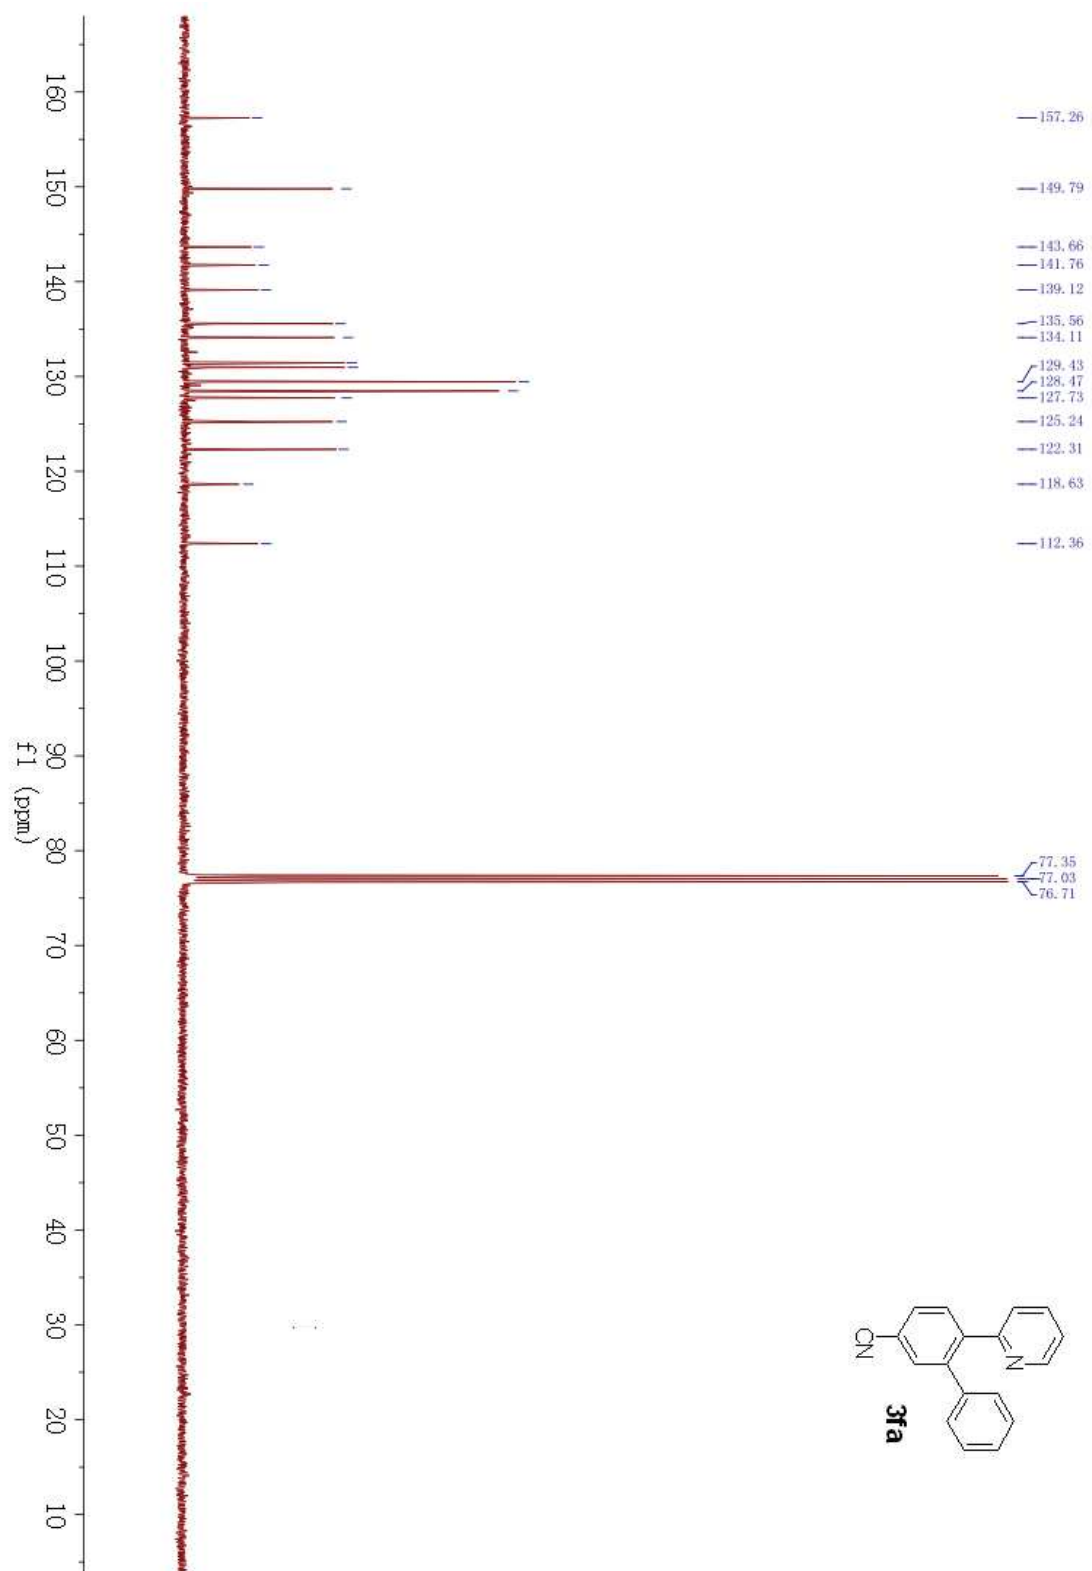

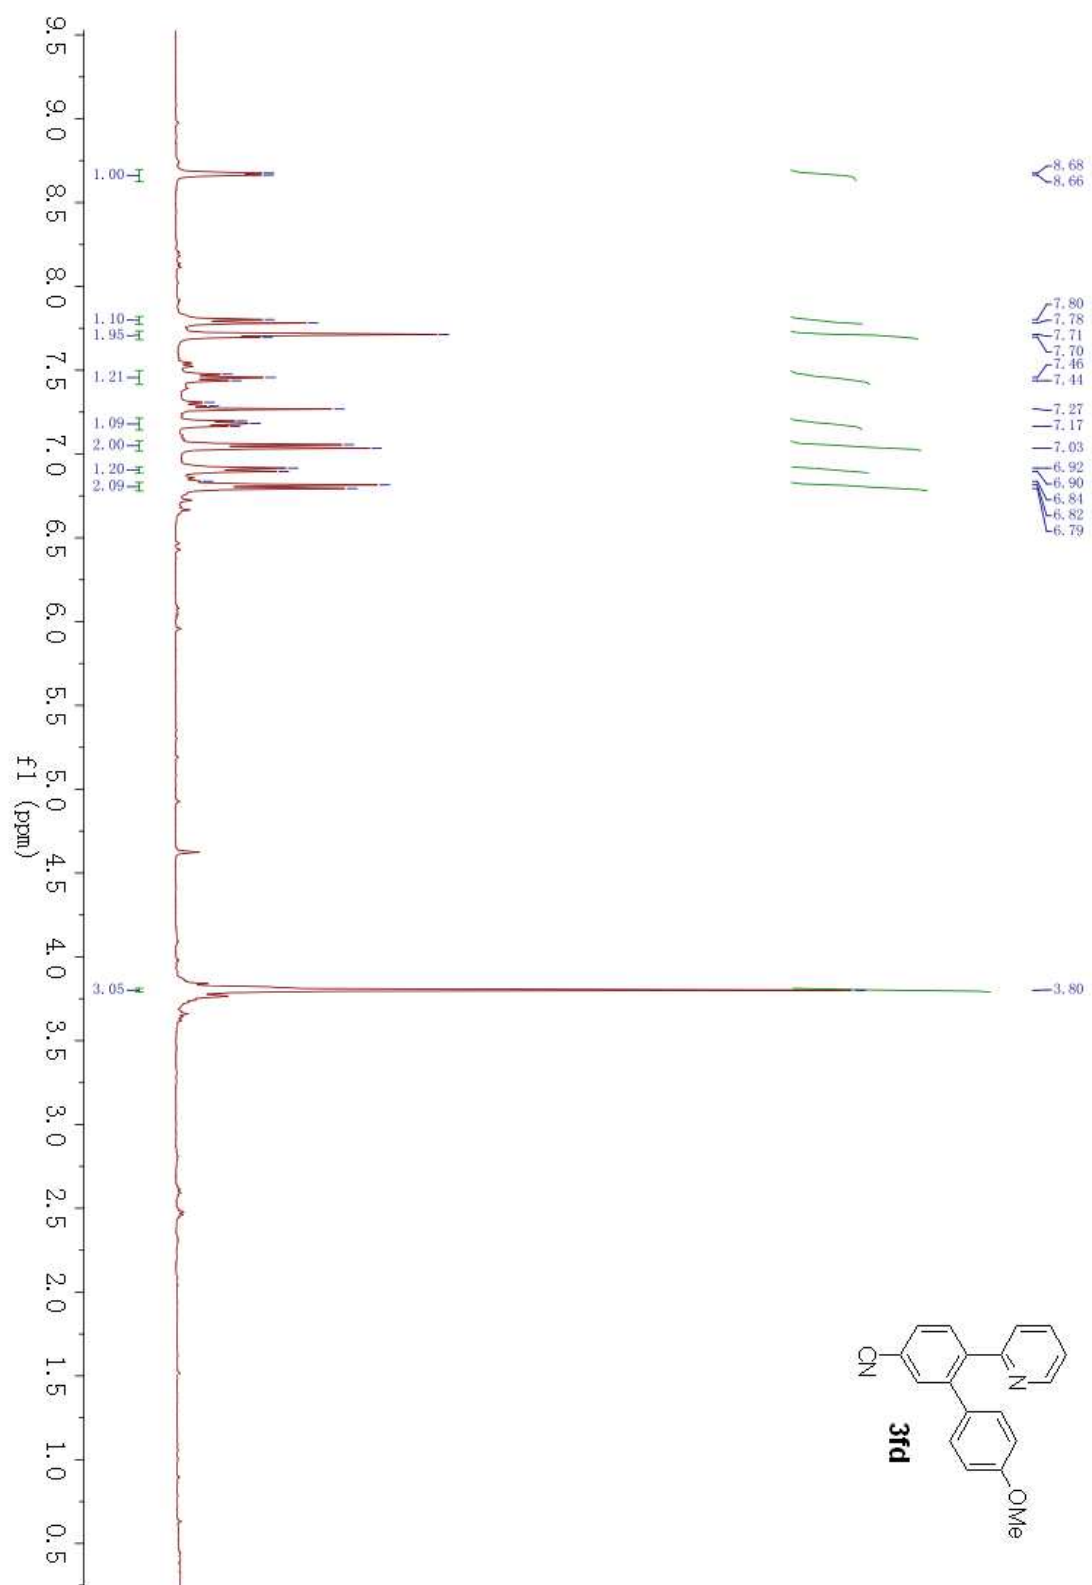



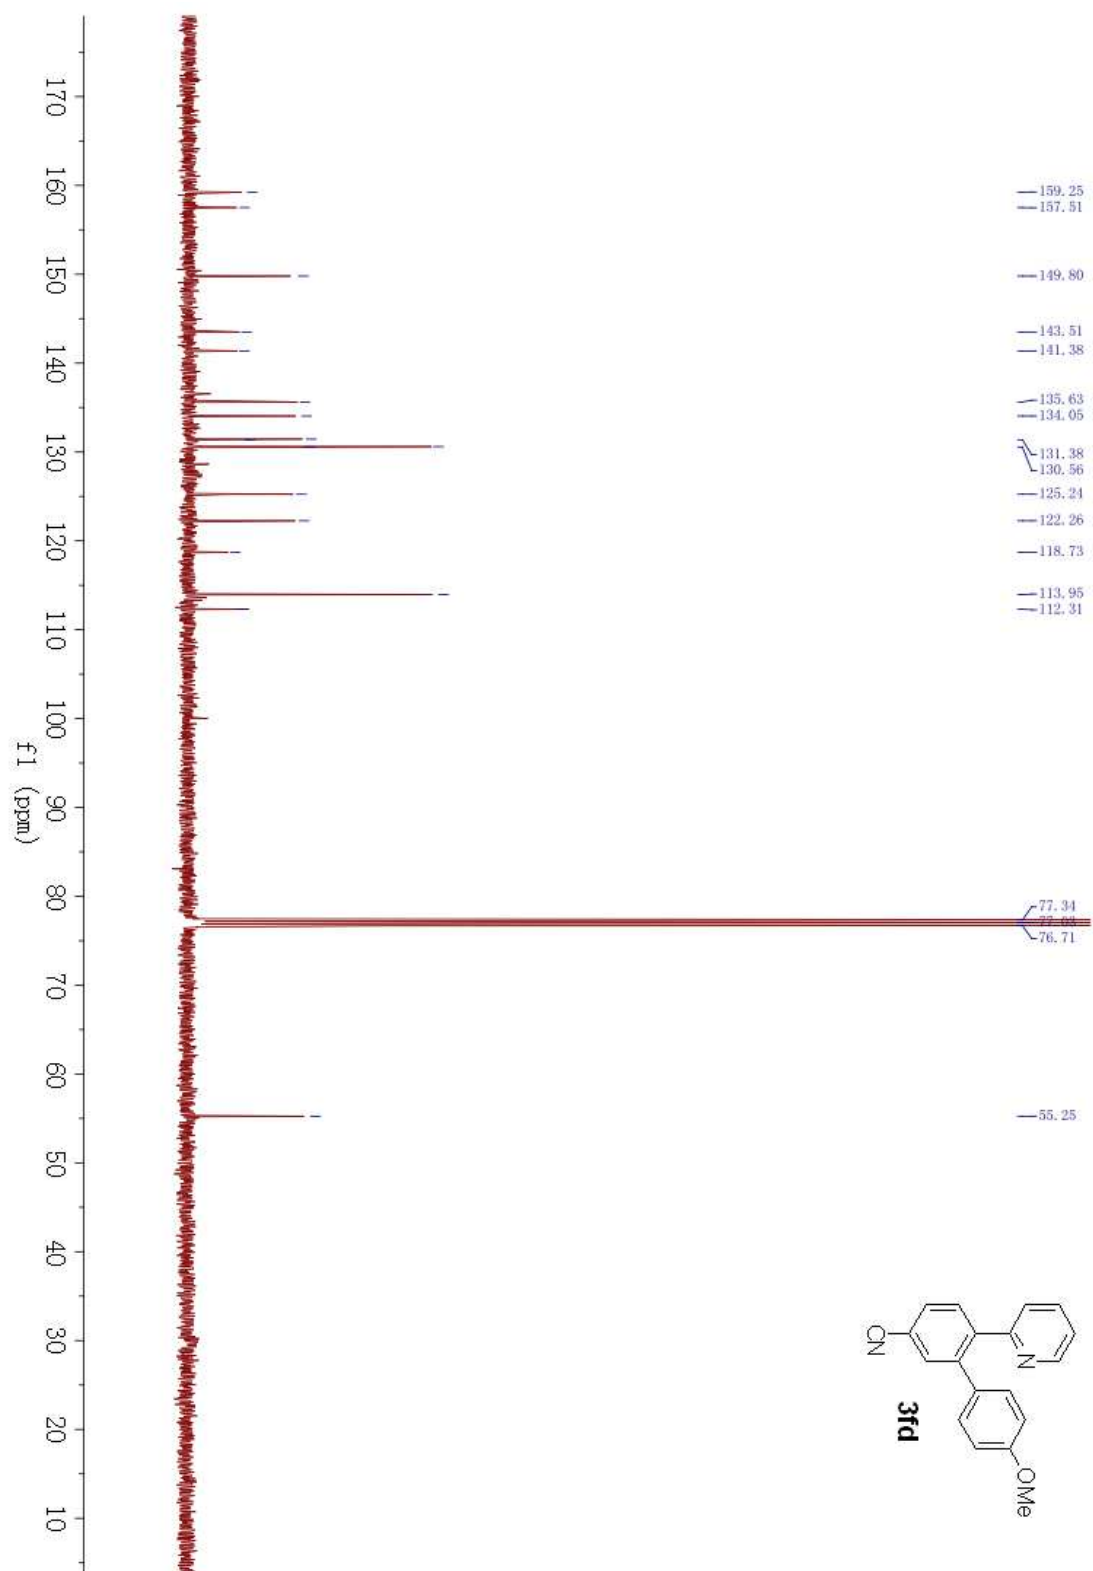

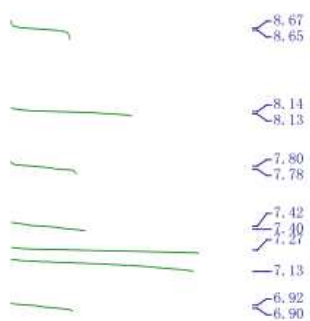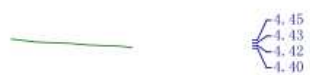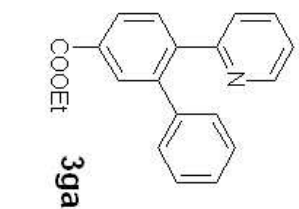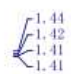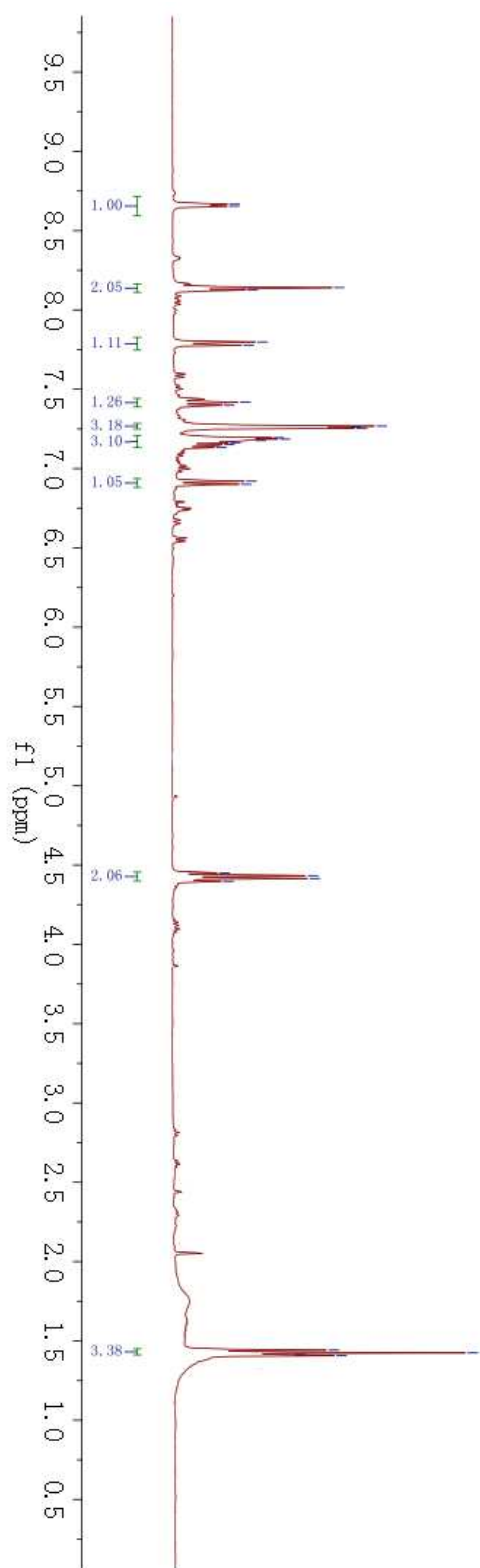

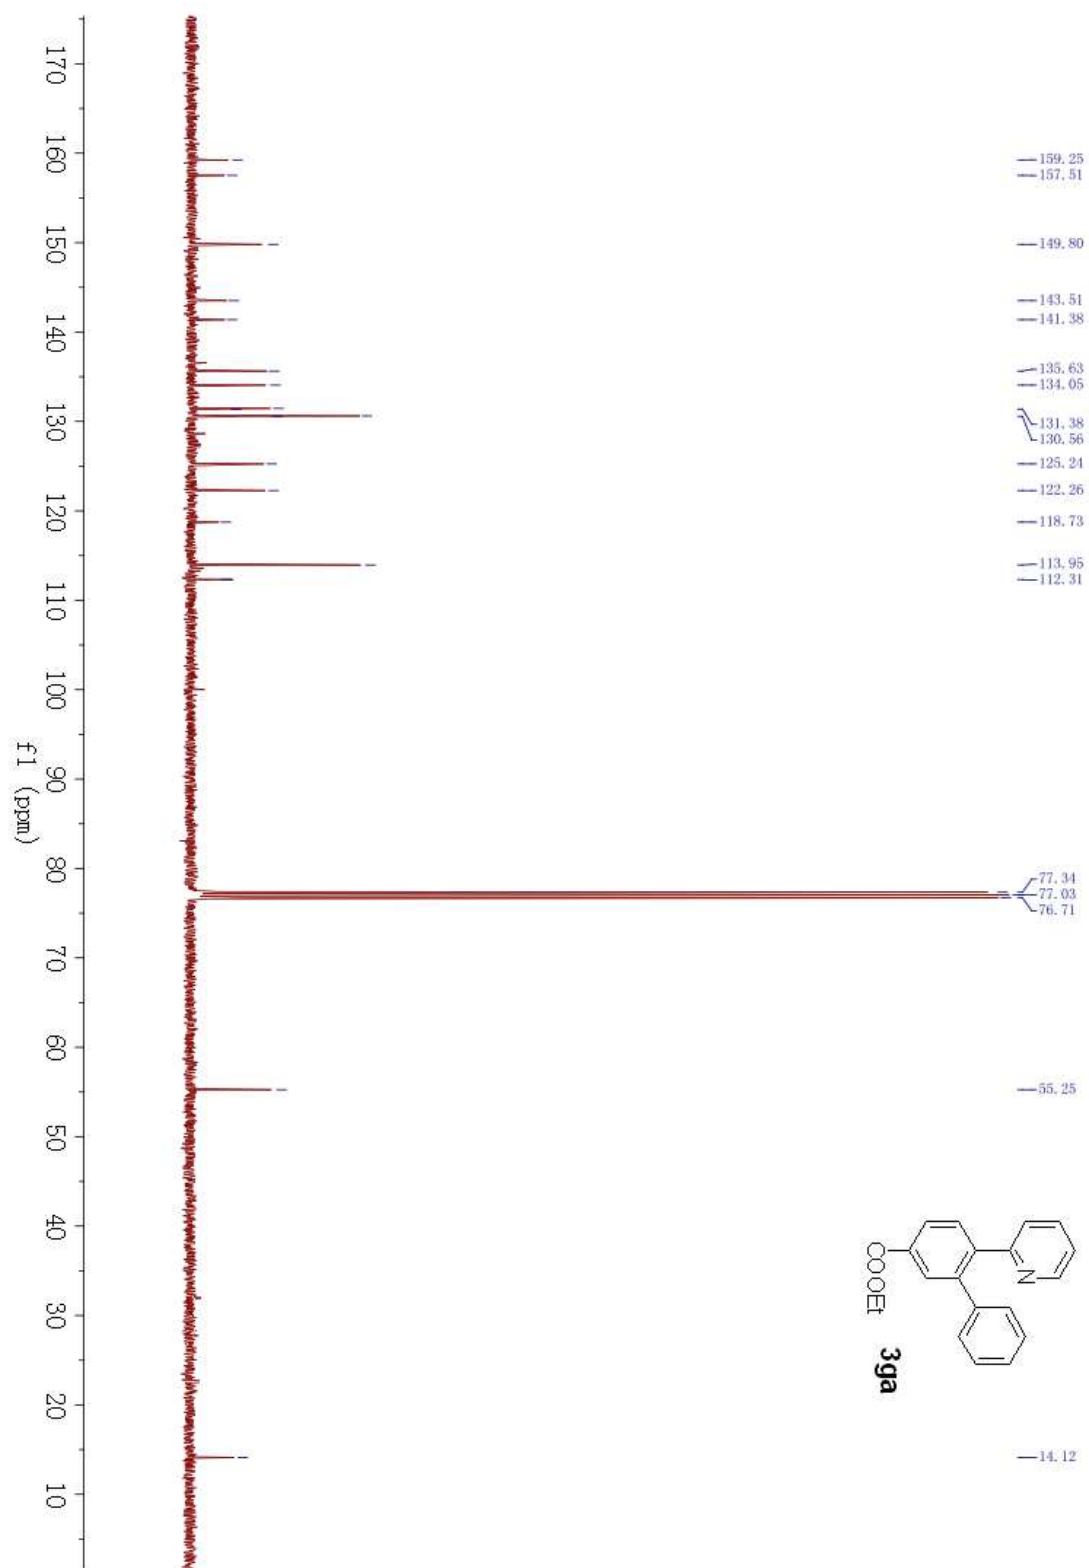

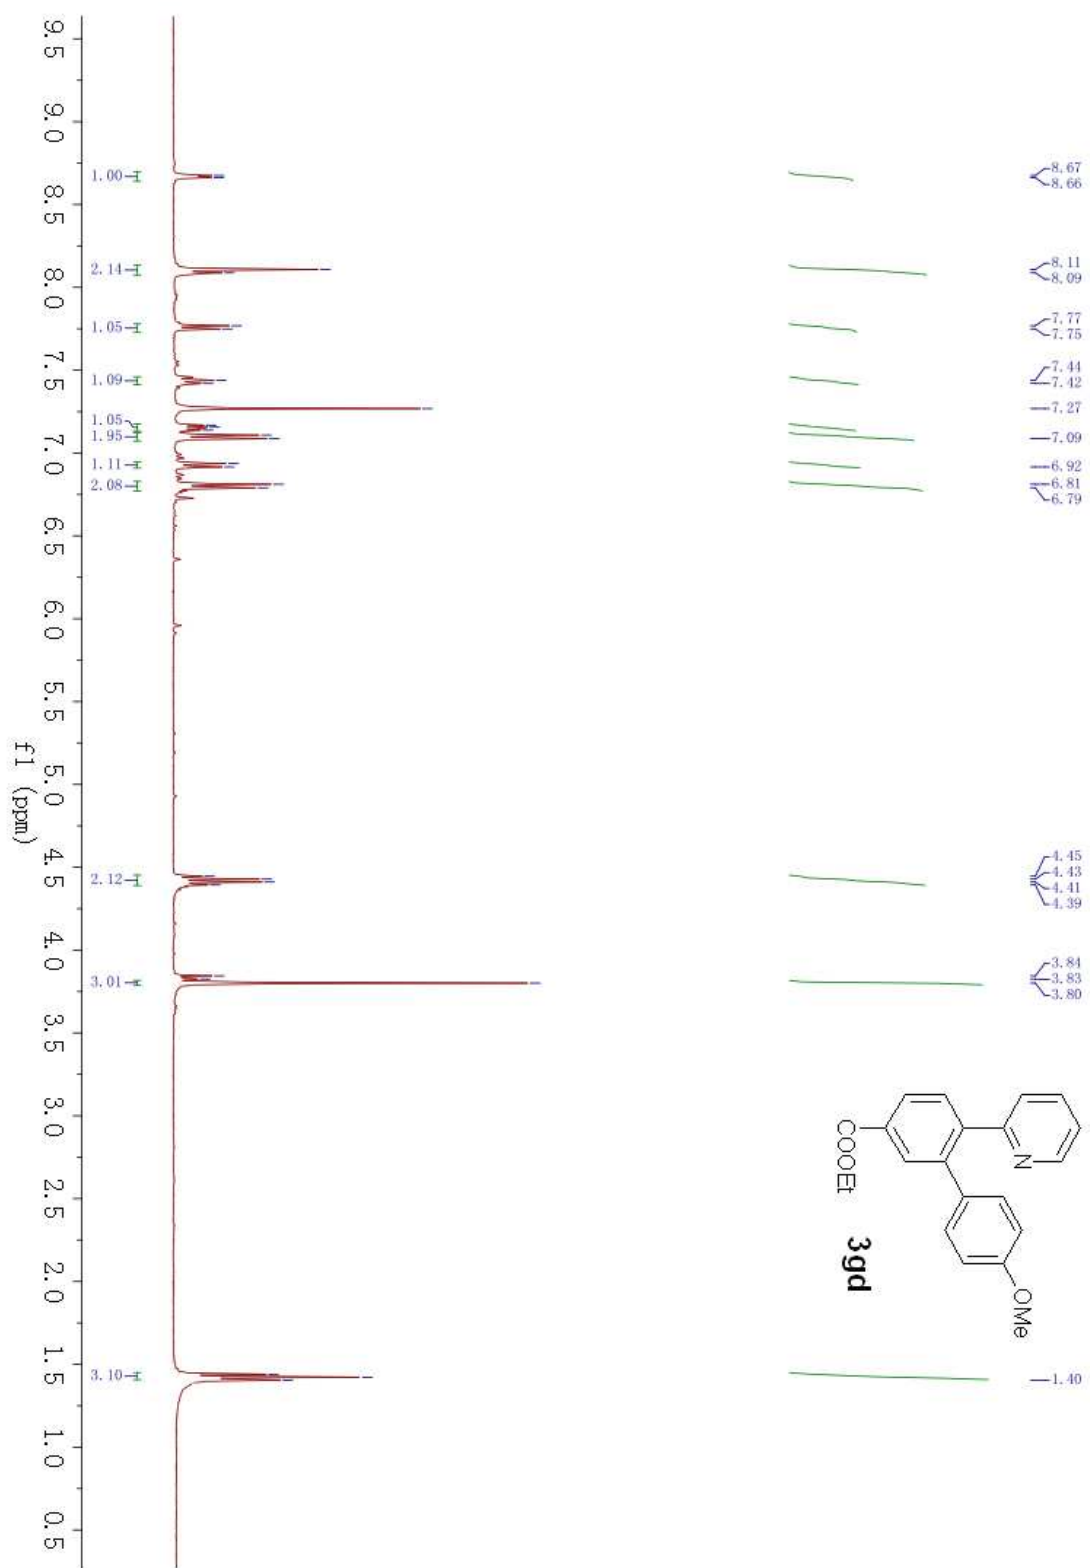

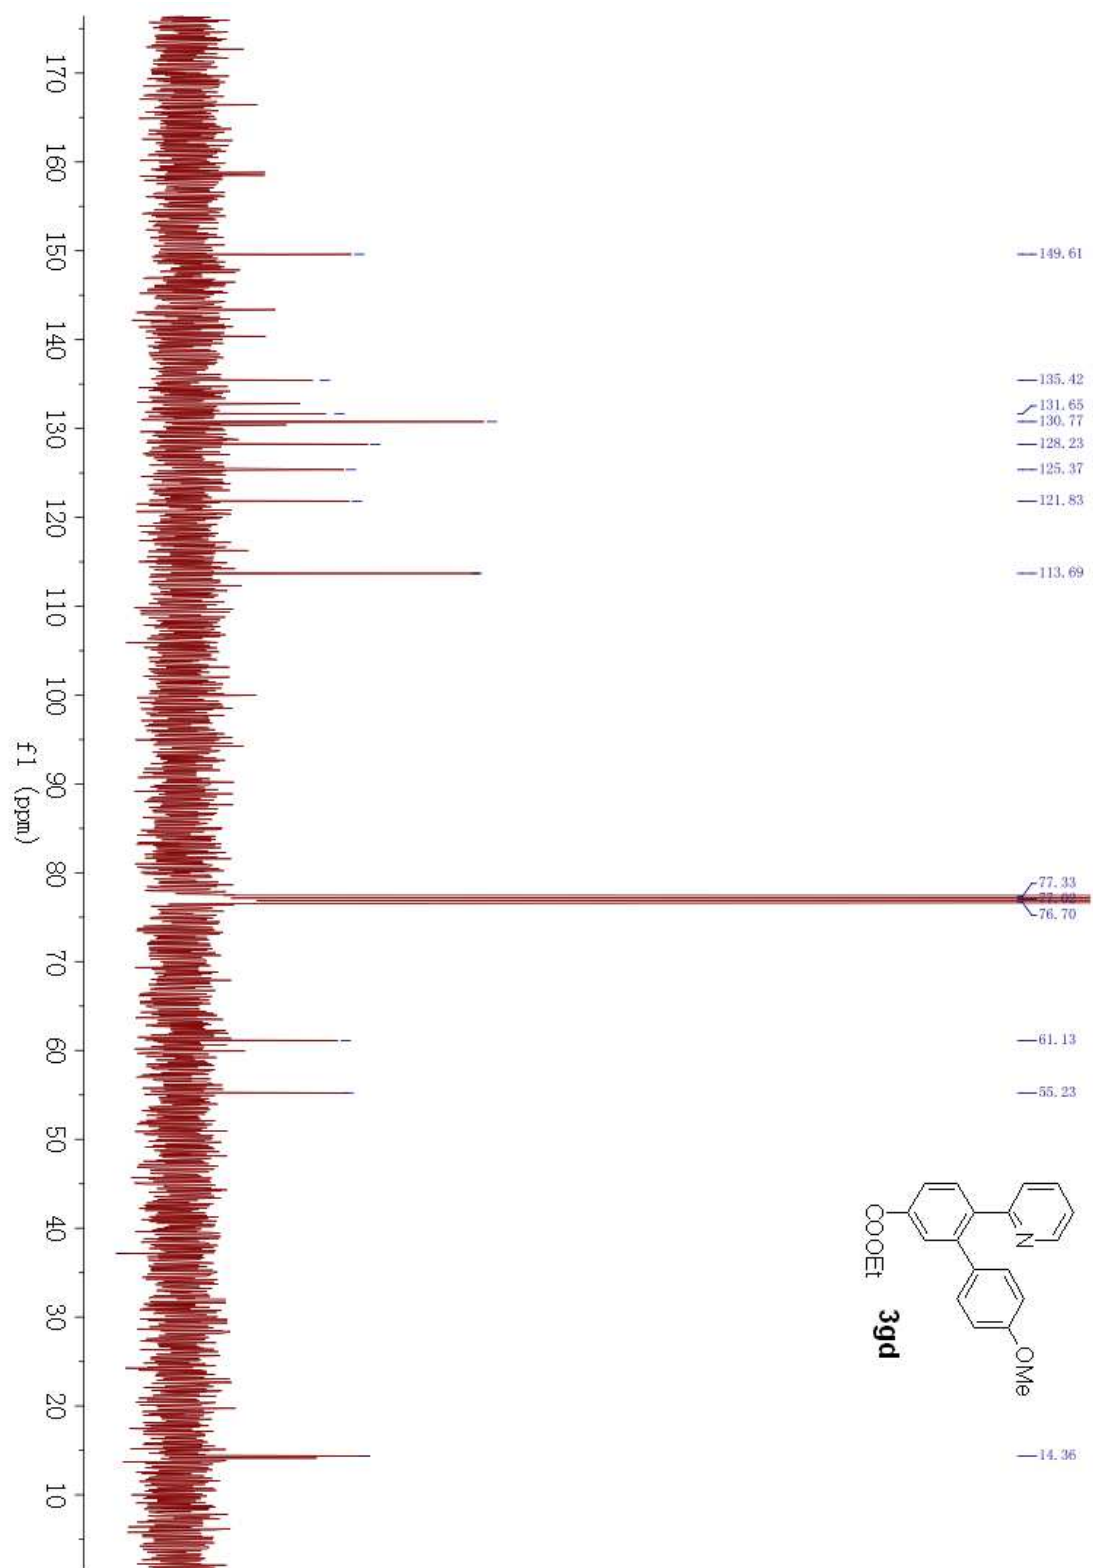

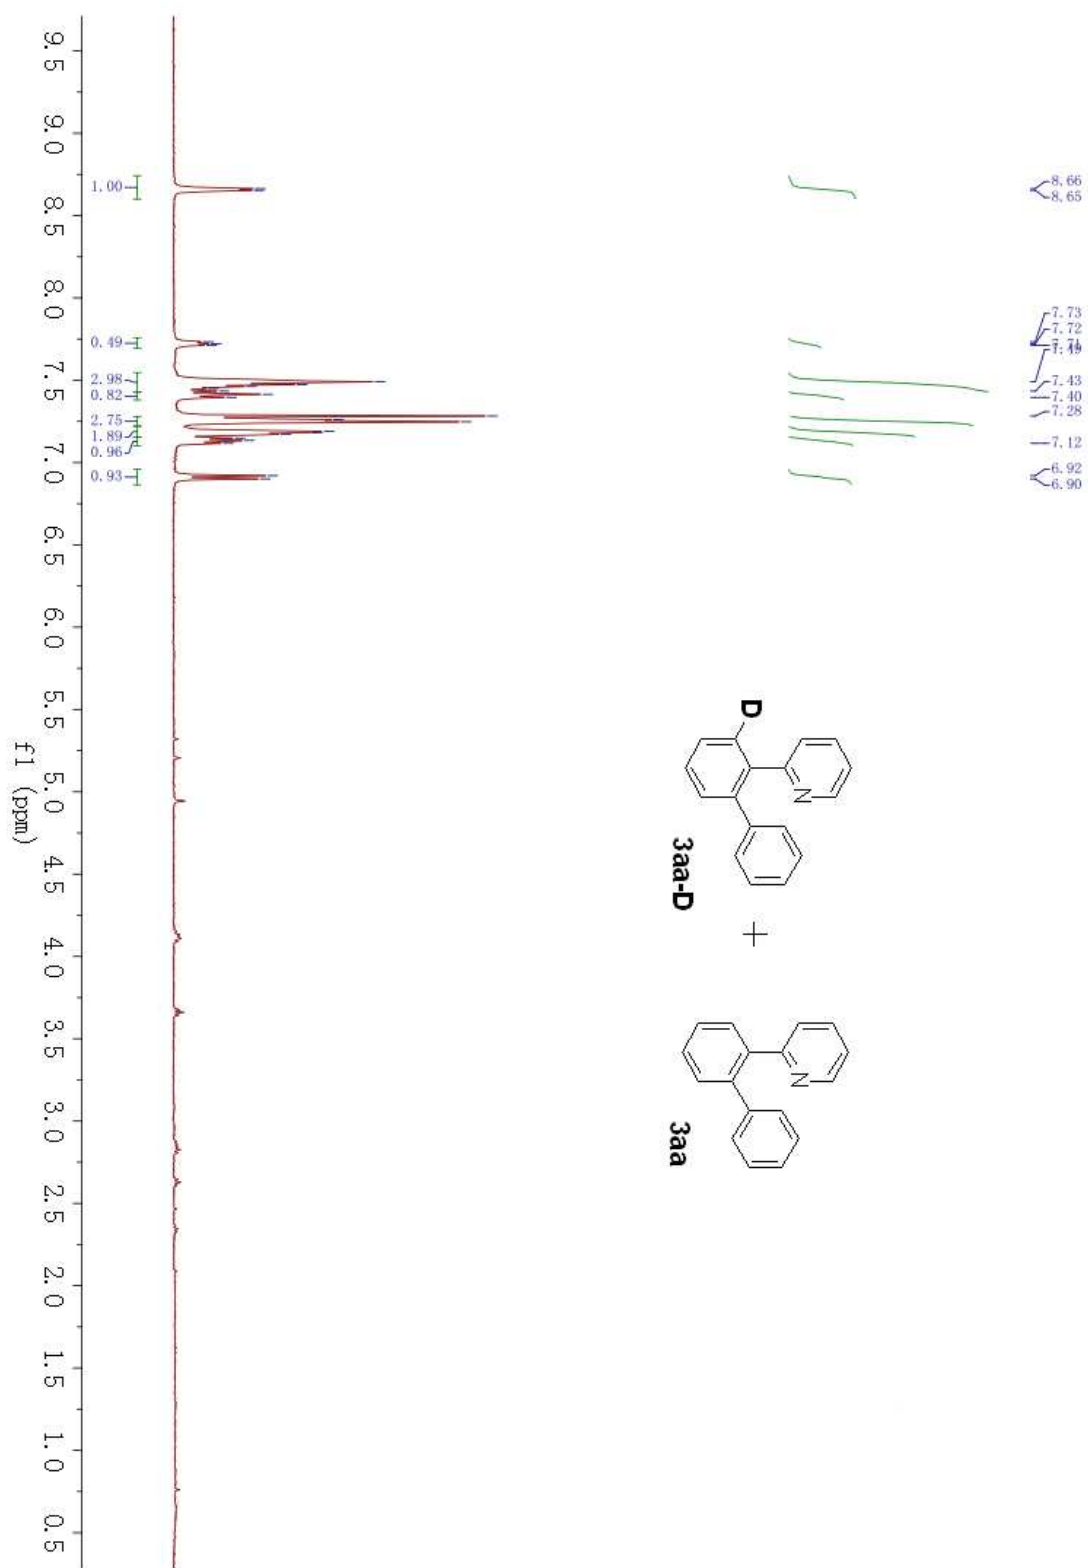

Supplement: Supplementary file 1 [file 4244869]
